# Supplementary material for: Genome-wide association study identifies multiple risk loci for renal cell carcinoma
Source: PubMed Central journal article supplement (PMC5472706; doi:10.1038/ncomms15724), 2017-06-09
Supplement: ncomms15724-s1.pdf [file ncomms15724-s1.pdf]

## Supplementary Figures

Supplementary Figure 1. Quantile-quantile plots for the stage 1 meta-analysis.

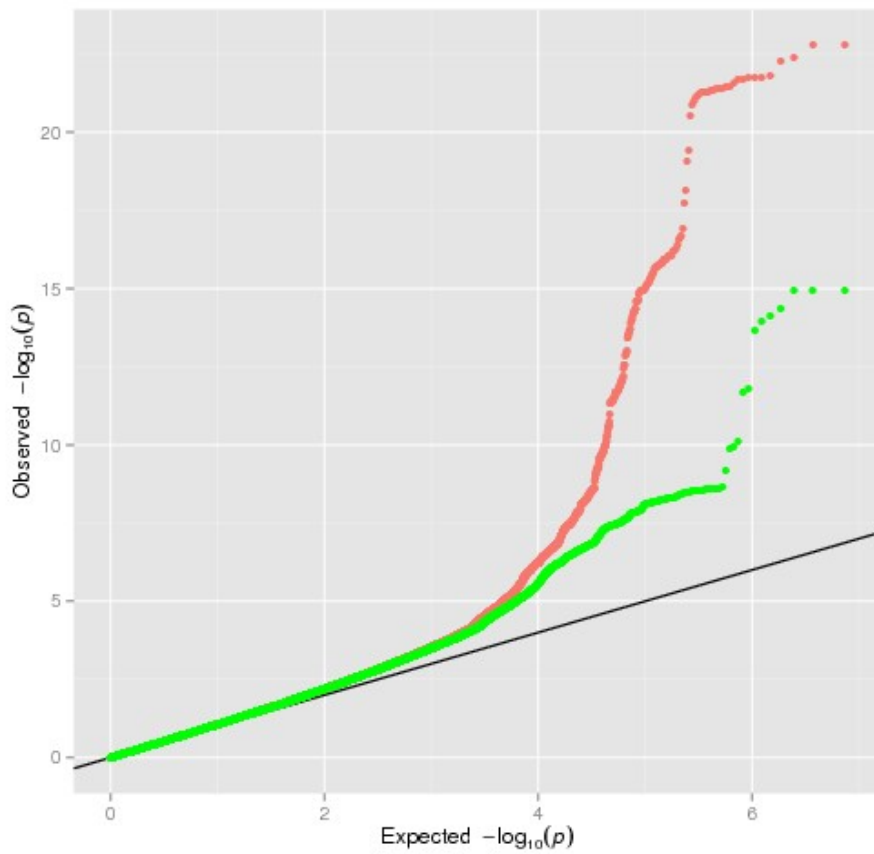

QQ plot after filtering out SNPs with  $MAF < 0.01$ . Red line includes all SNPs; green line excludes SNPs  $\pm 500\text{kb}$  of previously identified locus.

**Supplementary Figure 2. Manhattan plot of GWAS association P-values.**

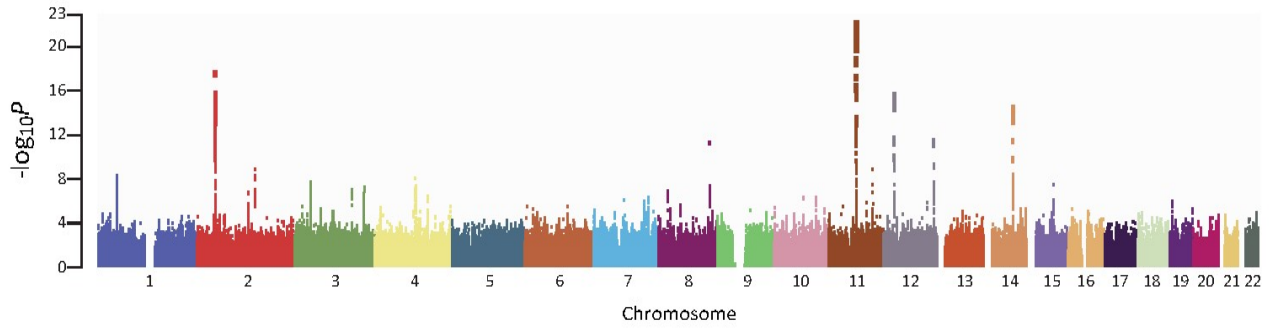

Supplementary Figure 3. Regional association LD plots

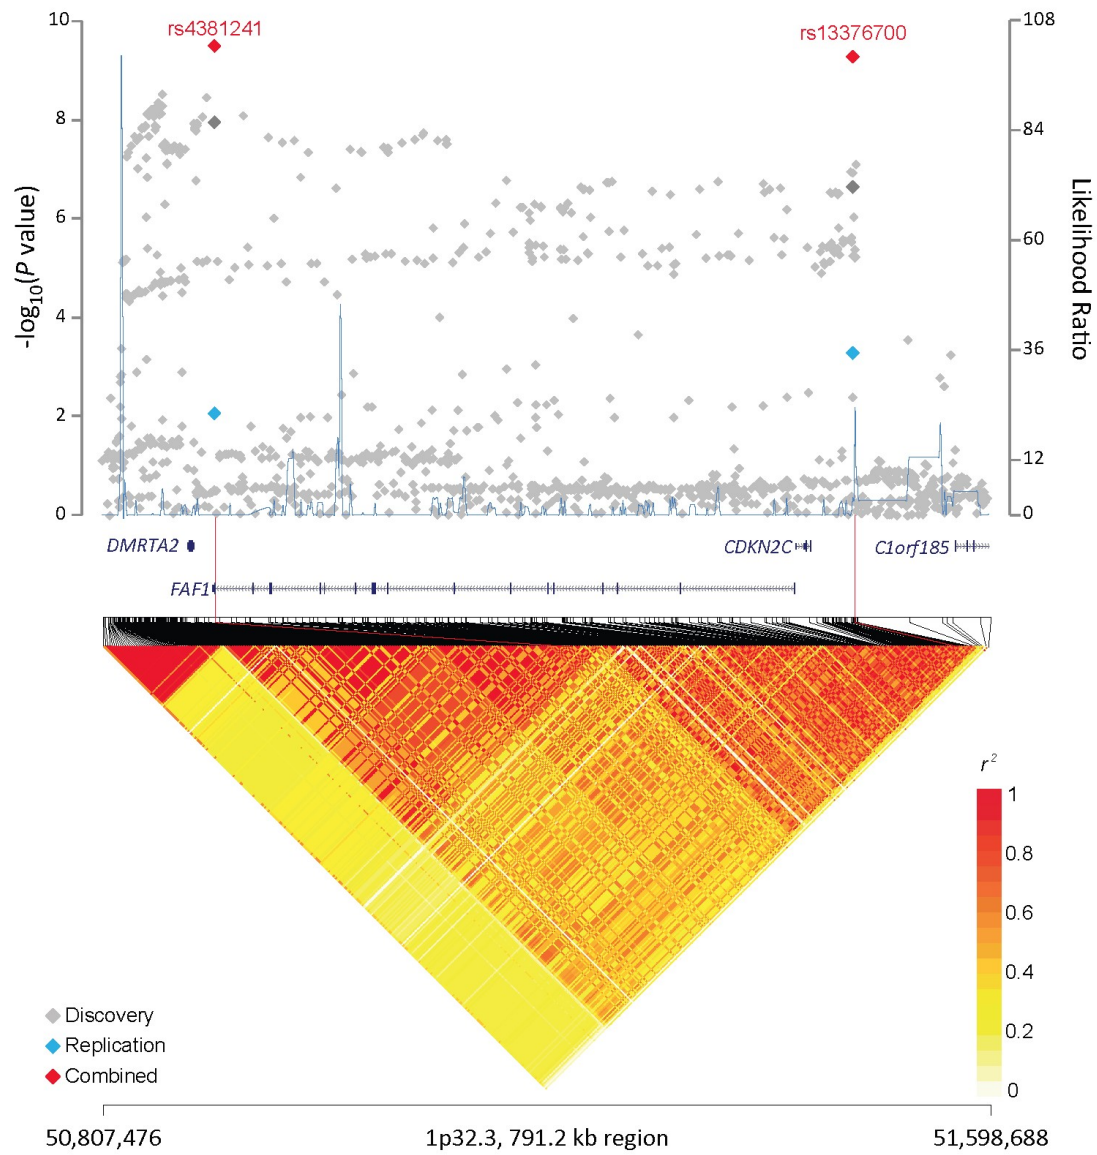

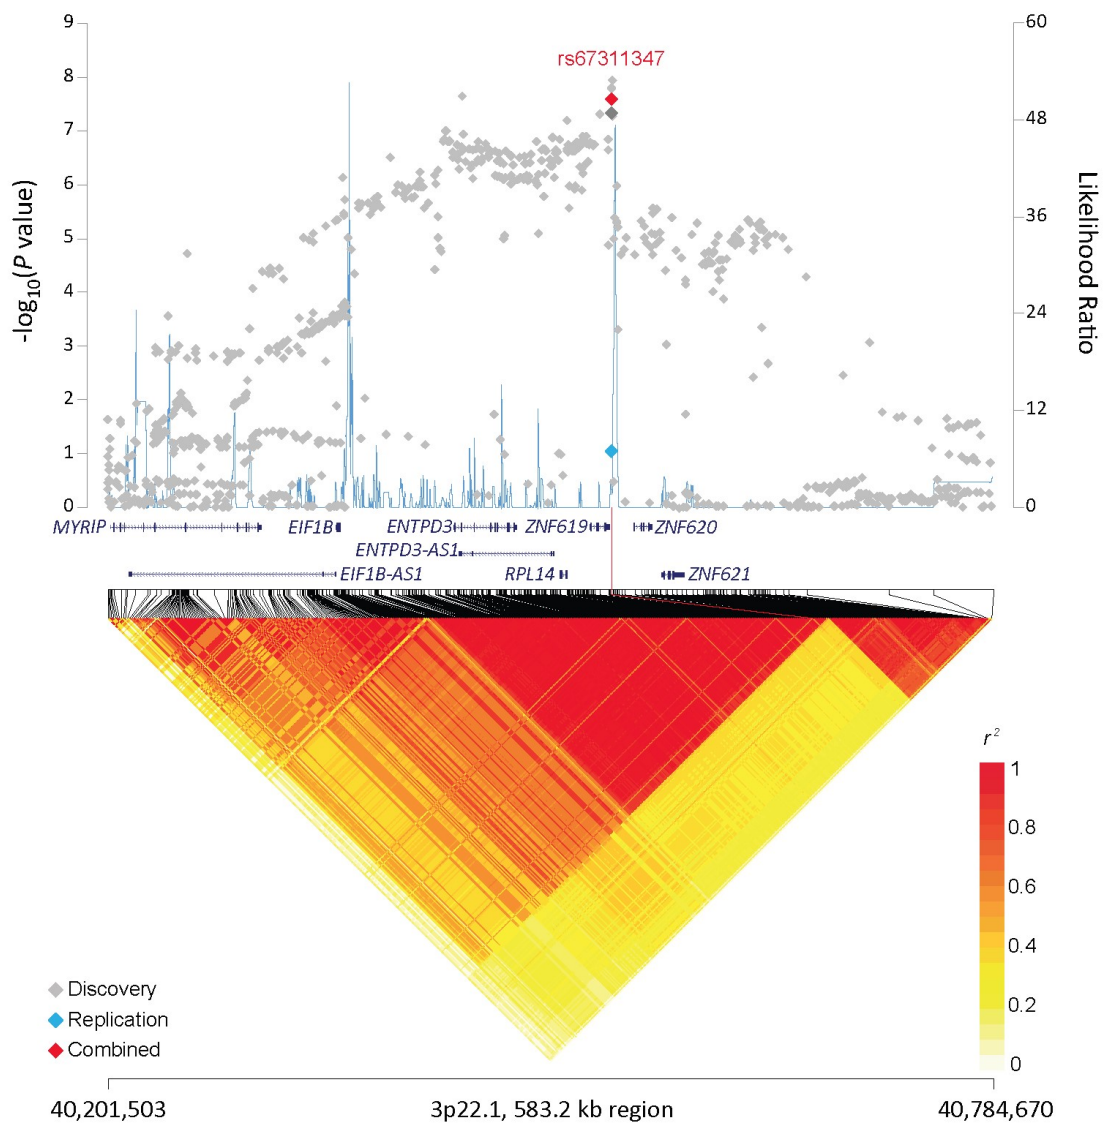

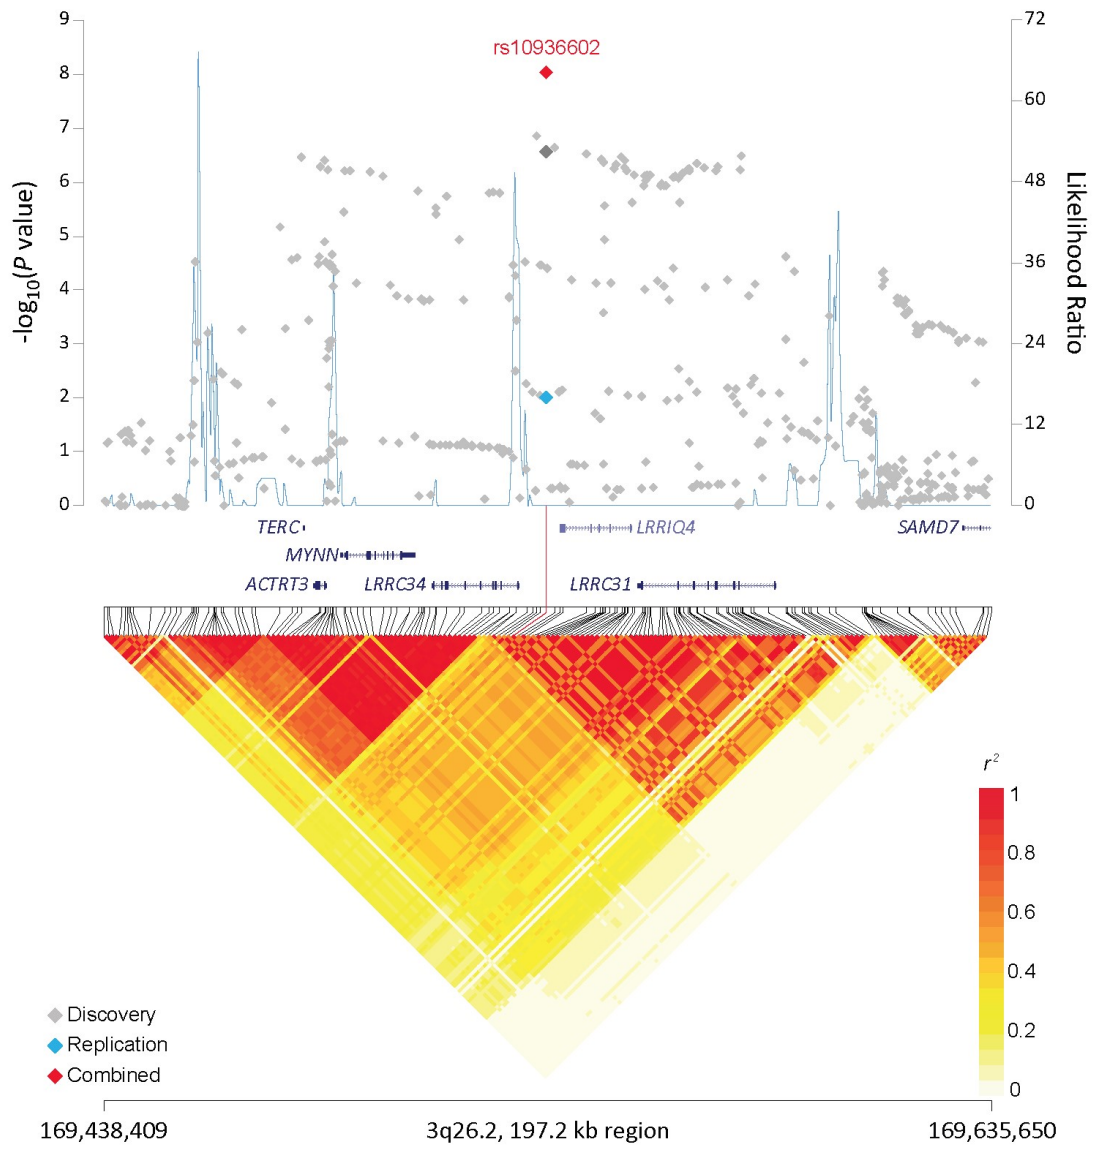

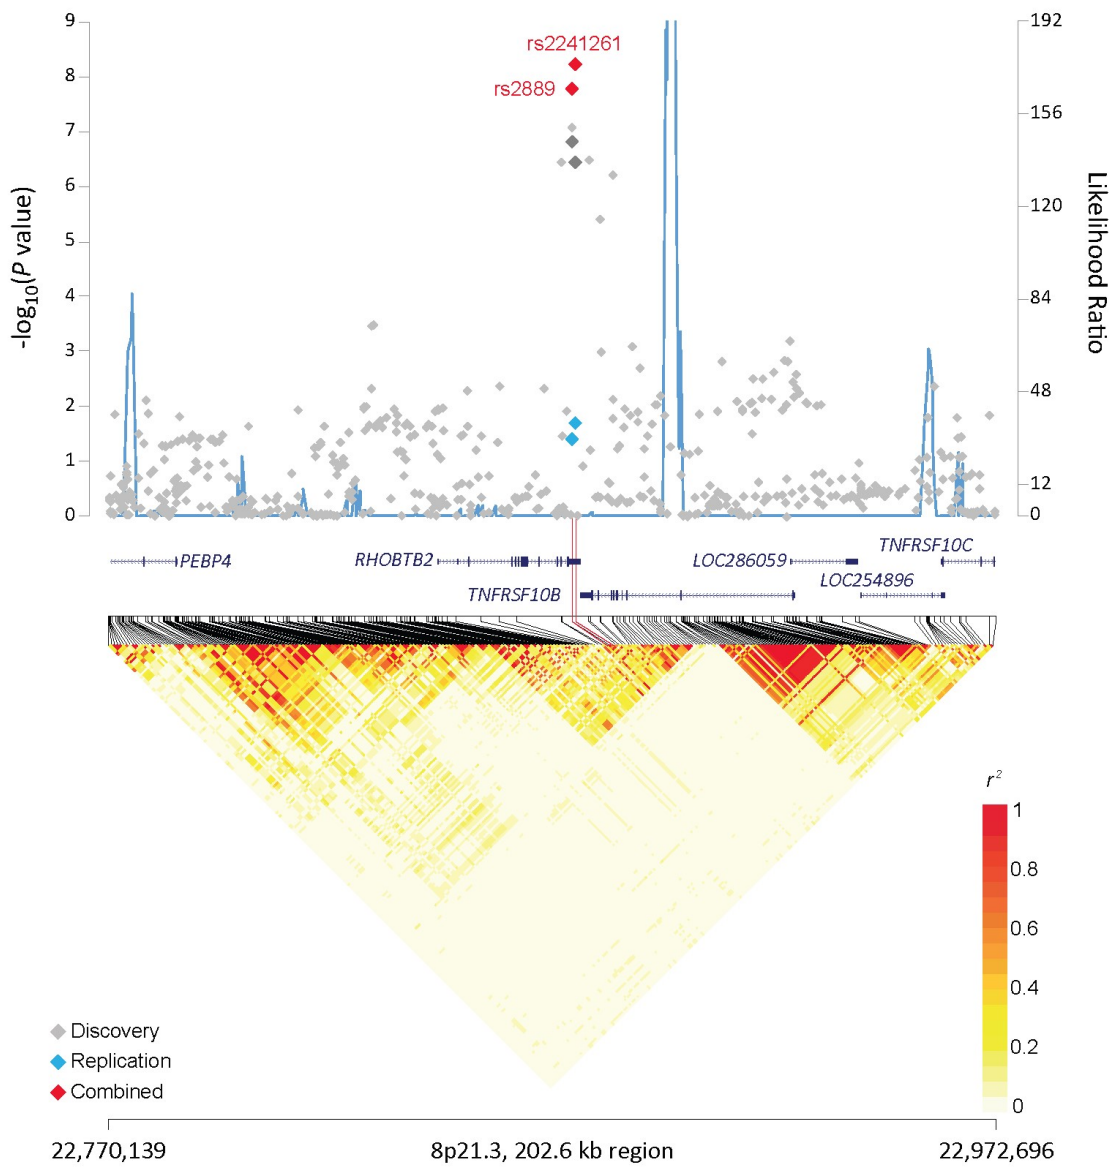

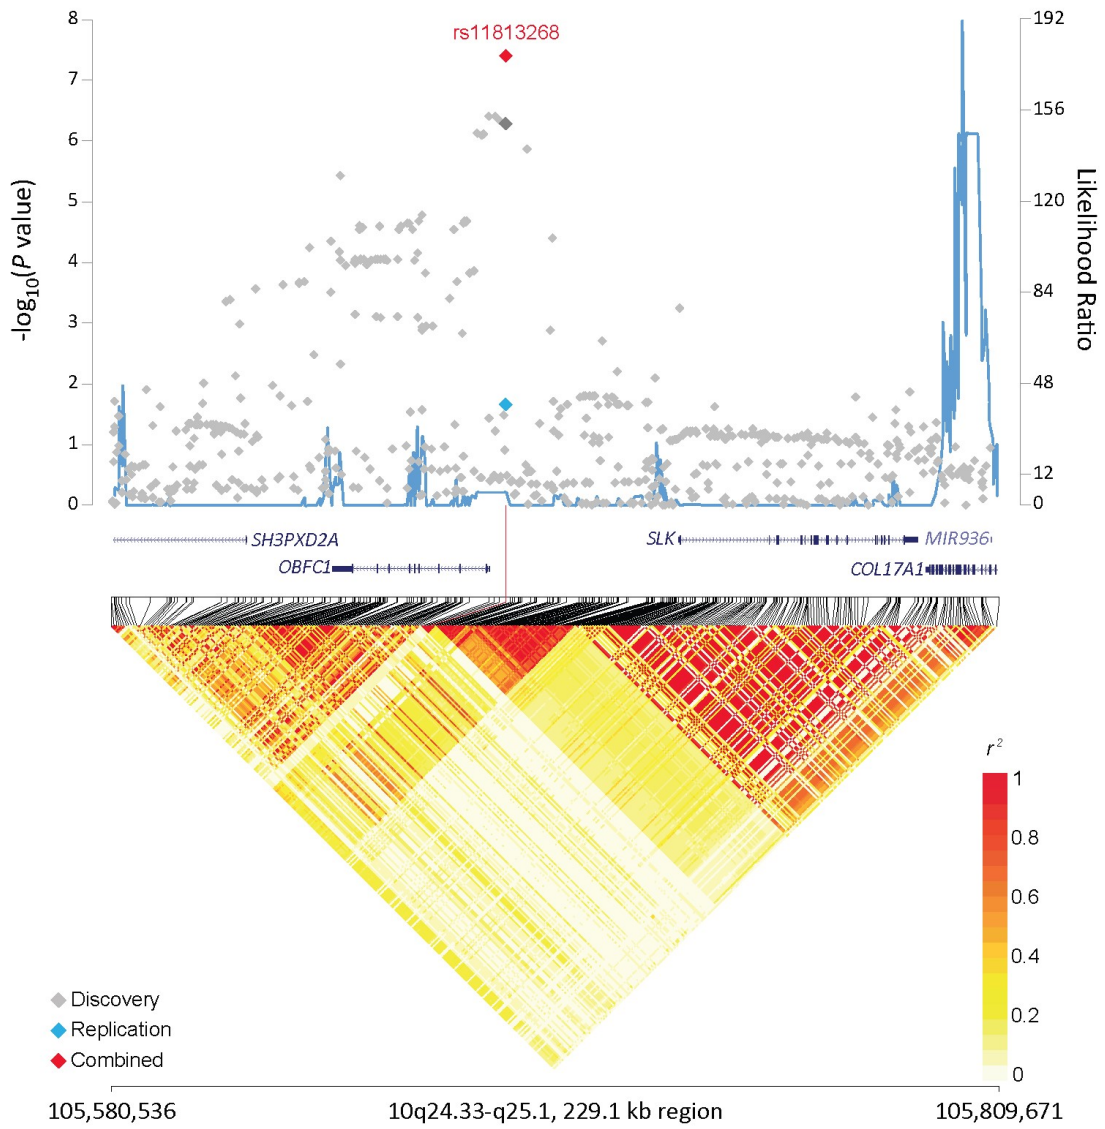

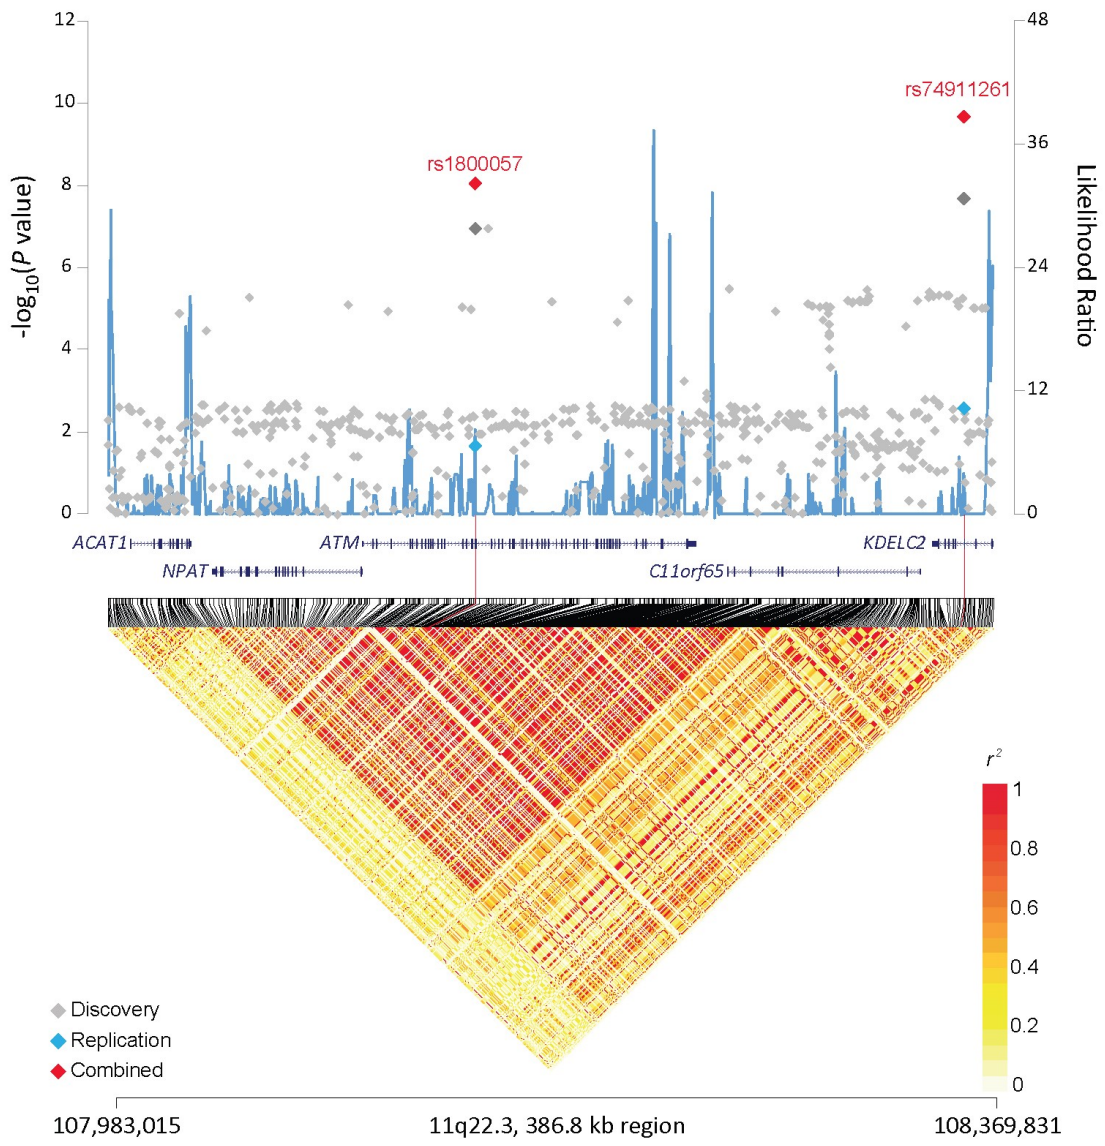



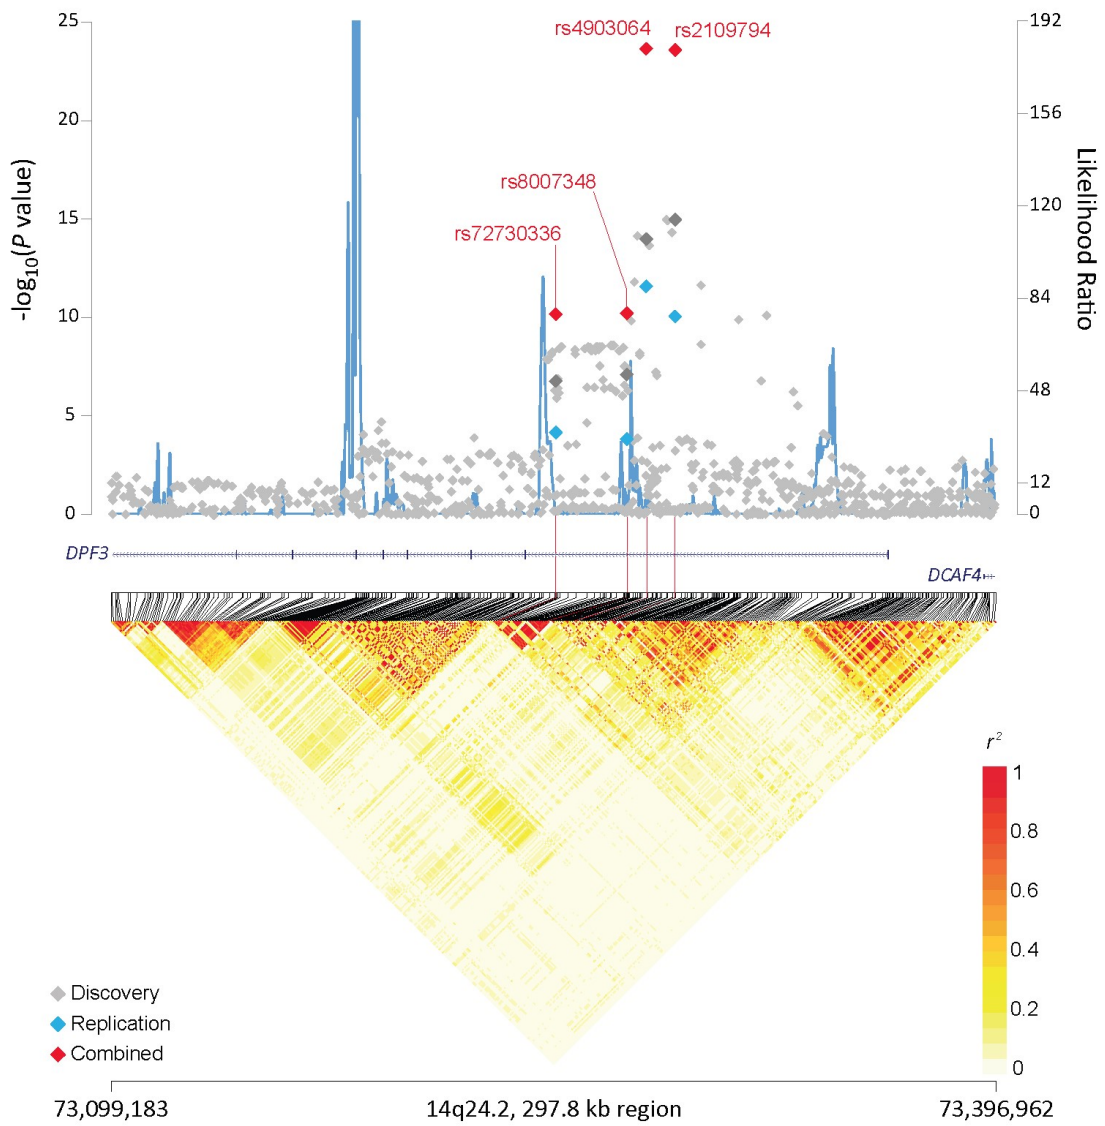

**Supplementary Figure 4. SNP analyses stratified by sex, body mass index (BMI; <25, 25-29, 30+ kg/m<sup>2</sup>), smoking status (never, former, current), and history of diagnosed hypertension**

| RSID       | Position        | Heterogeneity P-value |              |         |         | Notes                                                                 |
|------------|-----------------|-----------------------|--------------|---------|---------|-----------------------------------------------------------------------|
|            |                 | BMI                   | Hypertension | Sex     | Smoking |                                                                       |
| rs4381241  | chr1:50907438   | 0.1260                | 0.2971       | 0.9800  | 0.4365  |                                                                       |
| rs13376700 | chr1:51477643   | 0.1441                | 0.8296       | 0.5867  | 0.7499  |                                                                       |
| rs6706003  | chr2:46563392   | 0.7553                | 0.5484       | 0.4456  | 0.9480  |                                                                       |
| rs6755594  | chr2:46589295   | 0.0072                | 0.5257       | 0.3656  | 0.4870  |                                                                       |
| rs72851889 | chr2:144694129  | 0.4763                | 0.0759       | 0.9594  | 0.7222  |                                                                       |
| rs72855540 | chr2:144990548  | 0.6065                | 0.1736       | 0.3559  | 0.7988  |                                                                       |
| rs67311347 | chr3:40533243   | 0.9734                | 0.9460       | 0.2067  | 0.4066  |                                                                       |
| rs2203002  | chr3:141796239  | 0.6793                | 0.3010       | 0.5532  | 0.8355  |                                                                       |
| rs10936602 | chr3:169536637  | 0.0577                | 0.6883       | 0.0866  | 0.2242  |                                                                       |
| rs234043   | chr3:172313367  | 0.4390                | 0.3124       | 0.9282  | 0.2813  |                                                                       |
| rs7697932  | chr4:101005318  | 0.7494                | 0.0033       | 0.4040  | 0.0074  |                                                                       |
| rs17050872 | chr4:131097748  | 0.5047                | 0.8624       | 0.4159  | 0.5546  |                                                                       |
| rs76912165 | chr5:92965344   | 0.0322                | 0.8506       | 0.1022  | 0.5913  |                                                                       |
| rs1266819  | chr6:52094946   | 0.8495                | 0.4585       | 0.0836  | 0.8467  |                                                                       |
| rs59294613 | chr7:124554267  | 0.8329                | 0.3840       | 0.9974  | 0.0082  |                                                                       |
| rs73149977 | chr7:134488864  | 0.8895                | 0.4190       | 0.6981  | 0.0130  |                                                                       |
| rs2889     | chr8:22875909   | 0.2791                | 0.5079       | 0.2006  | 0.4373  |                                                                       |
| rs2241261  | chr8:22876739   | 0.1427                | 0.4912       | 0.5391  | 0.6539  |                                                                       |
| rs7913447  | chr10:73992040  | 0.7282                | 0.8890       | 0.8155  | 0.1781  |                                                                       |
| rs11813268 | chr10:105682296 | 0.8877                | 0.6983       | 0.1433  | 0.2921  |                                                                       |
| rs7774900  | chr11:95830733  | 0.5445                | 0.0733       | 0.8029  | 0.1773  |                                                                       |
| rs1800057  | chr11:108143456 | 0.2800                | 0.6833       | 0.0614  | 0.8114  |                                                                       |
| rs74911261 | chr11:108357137 | 0.2001                | 0.6537       | 0.1407  | 0.5375  |                                                                       |
| rs77736197 | chr12:107623706 | 0.9695                | 0.4229       | 0.5077  | 0.0973  |                                                                       |
| rs72730336 | chr14:73248661  | 0.2424                | 0.7131       | 0.0043  | 0.9807  | Stronger effect in females; some heterogeneity observed among males   |
| rs8007348  | chr14:73272730  | 0.2646                | 0.7935       | 0.0026  | 0.9964  | Stronger effect in females                                            |
| rs4903064  | chr14:73279420  | 0.2630                | 0.8311       | <0.0001 | 0.1338  | Stronger effect in females; some heterogeneity observed among females |
| rs2109794  | chr14:73288855  | 0.2743                | 0.6162       | <0.0001 | 0.2676  | Stronger effect in females                                            |
| rs11637556 | chr15:66728951  | 0.2492                | 0.8158       | 0.9727  | 0.7230  |                                                                       |
| rs4804368  | chr19:7190290   | 0.6837                | 0.1725       | 0.5010  | 0.0194  |                                                                       |

rs4381241

Body Mass Index

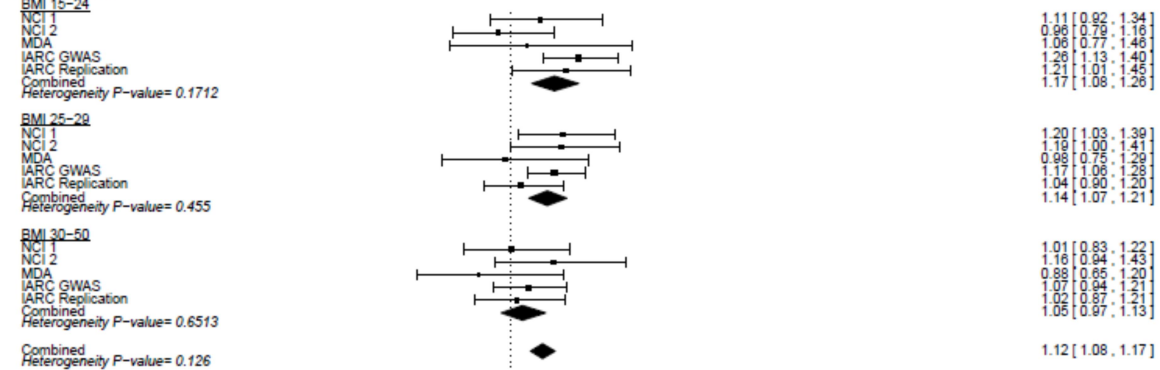

Hypertension

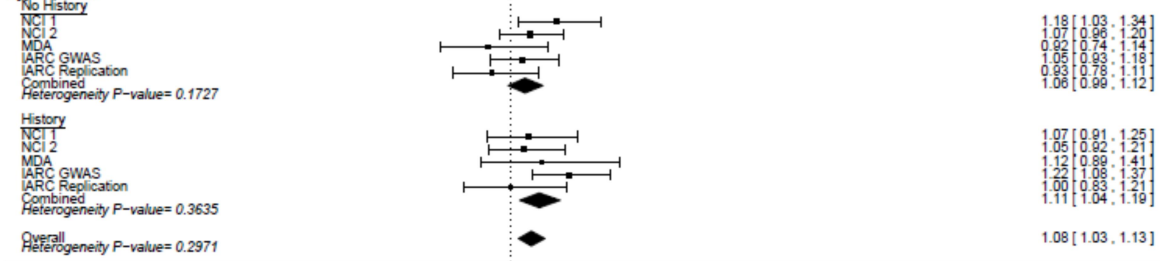

Sex

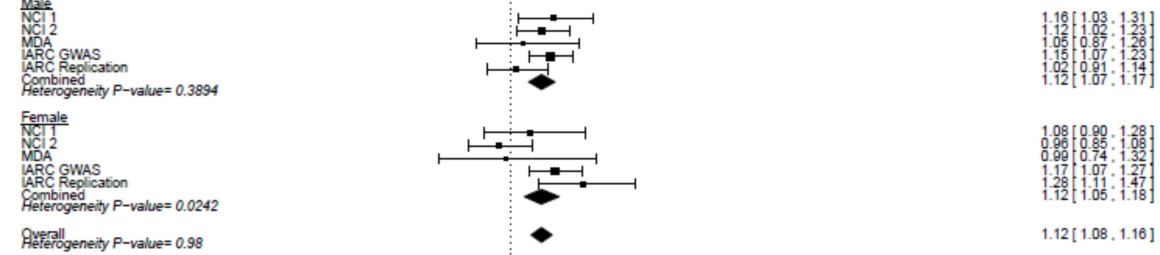

Smoking

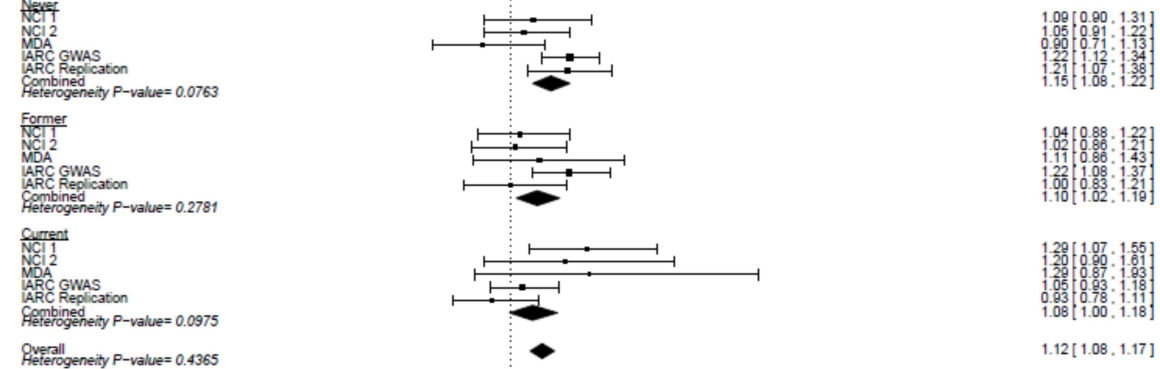

0.50 1.00 1.50 2.00

Odds Ratio

rs13376700

Body Mass Index

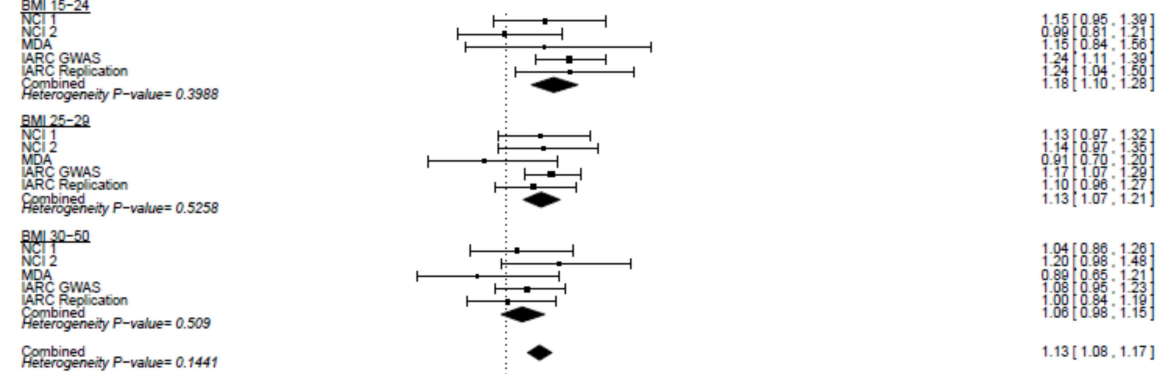

Hypertension

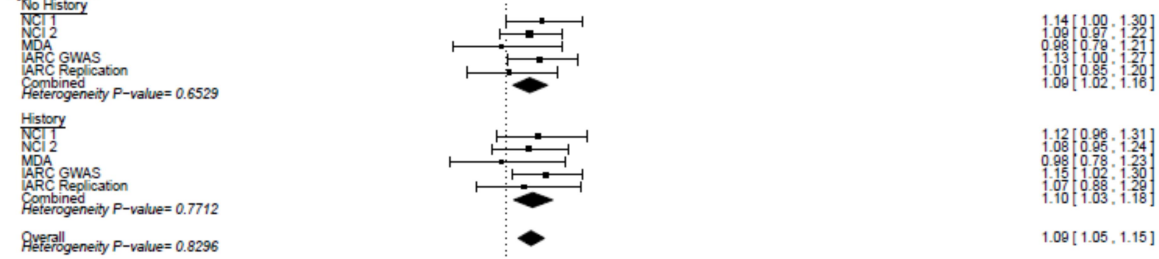

Sex

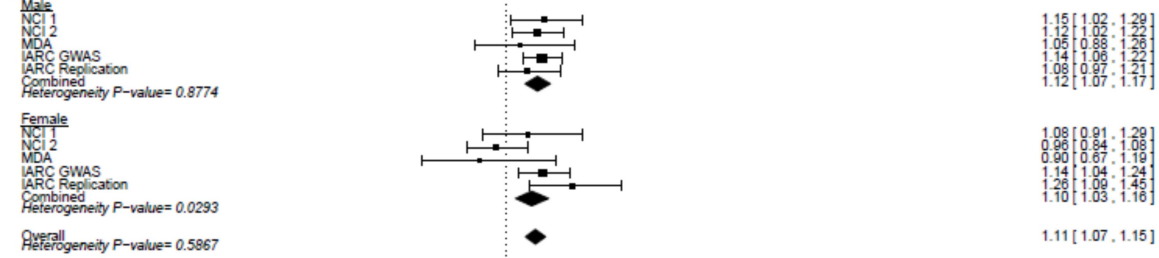

Smoking

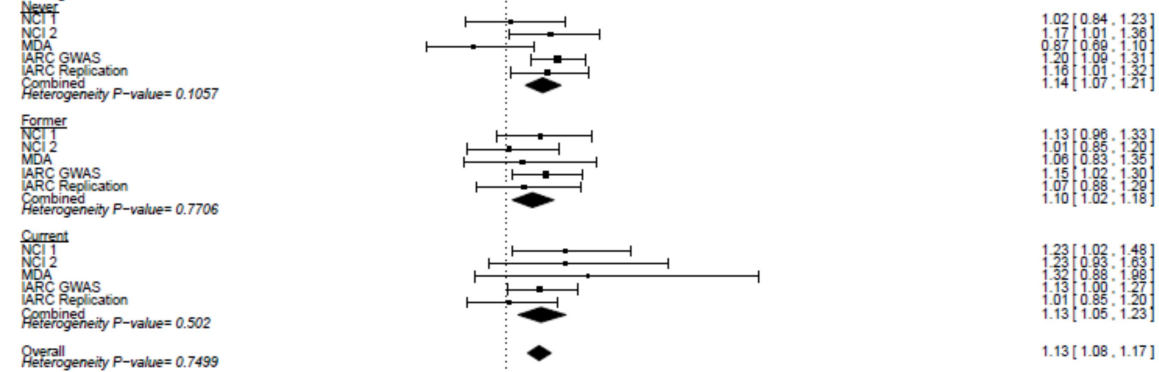

0.50 1.00 1.50 2.00  
Odds Ratio

rs6706003

Body Mass Index

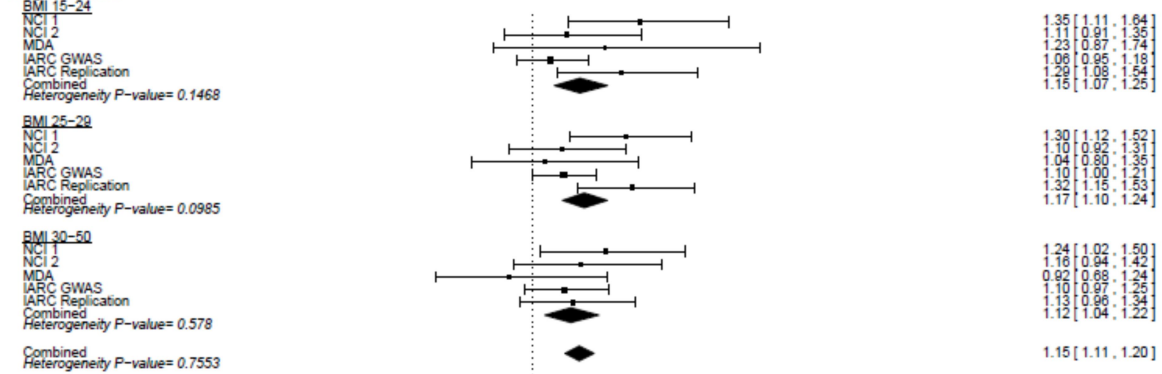

Hypertension

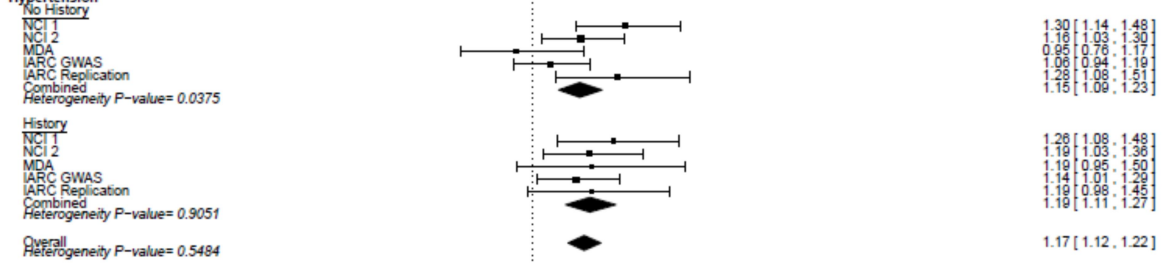

Sex

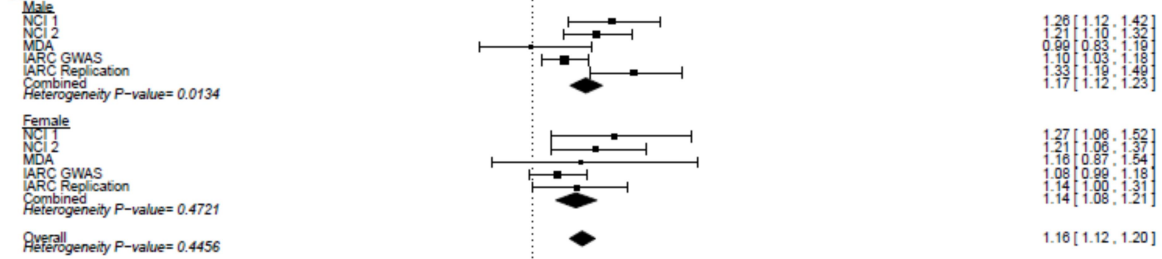

Smoking

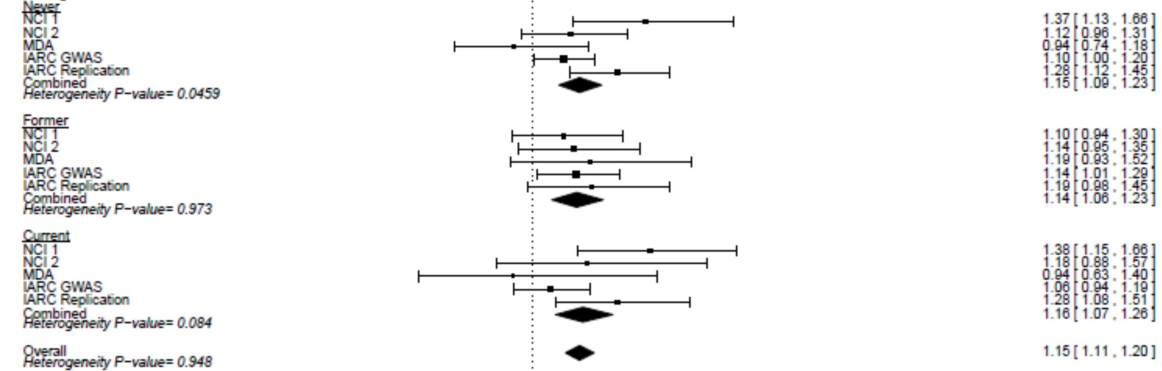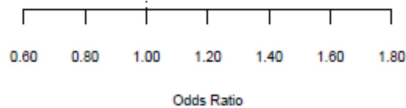

rs6755594

Body Mass Index

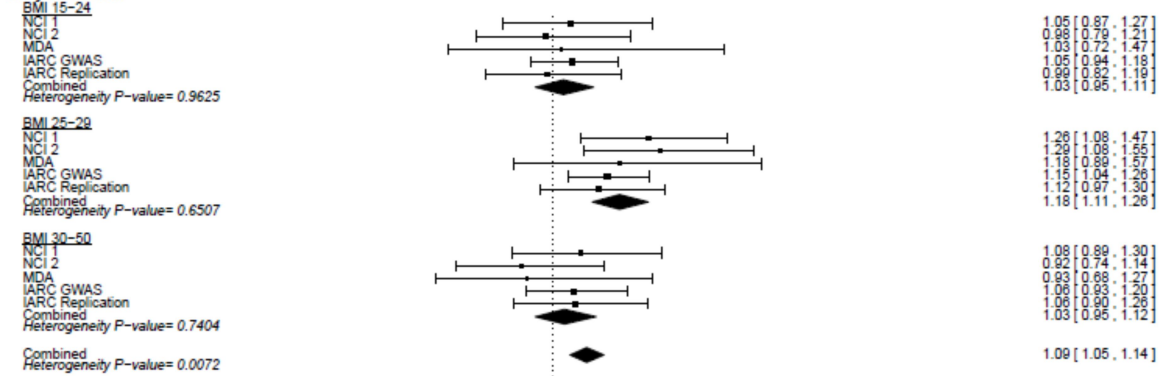

Hypertension

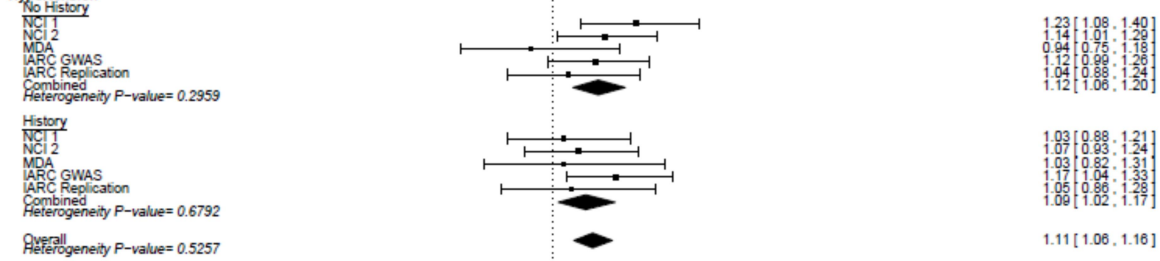

Sex

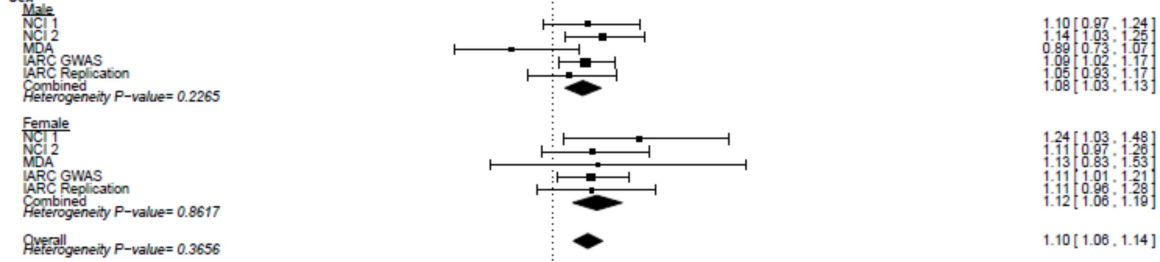

Smoking

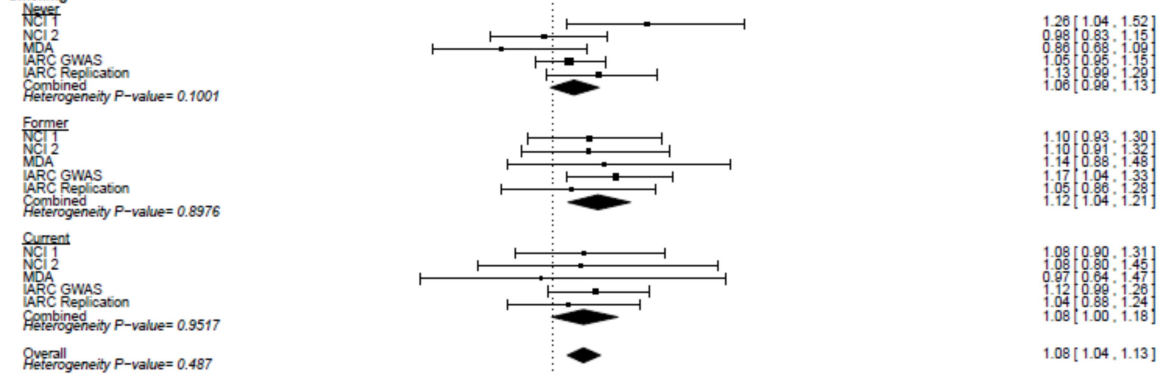

0.60 0.80 1.00 1.20 1.40 1.60  
Odds Ratio

rs72851889

**Body Mass Index**

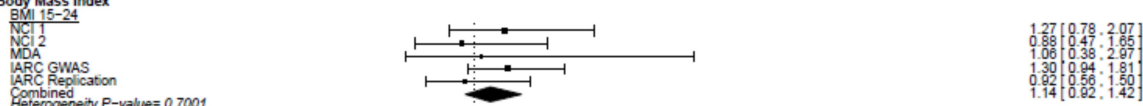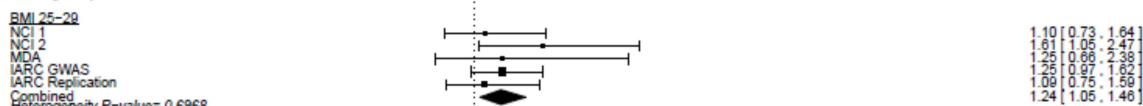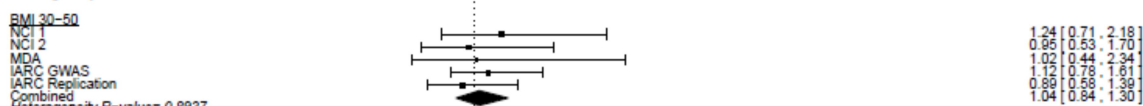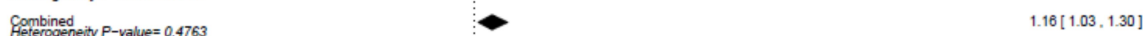

**Hypertension**

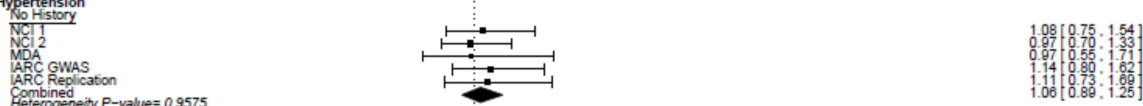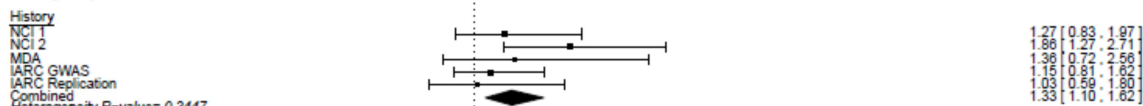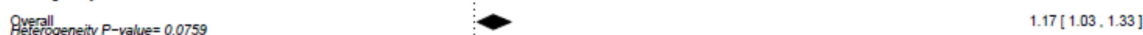

**Sex**

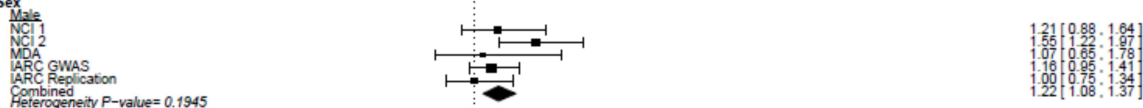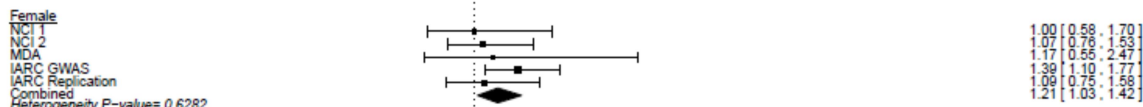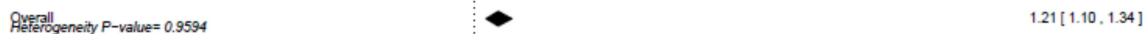

**Smoking**

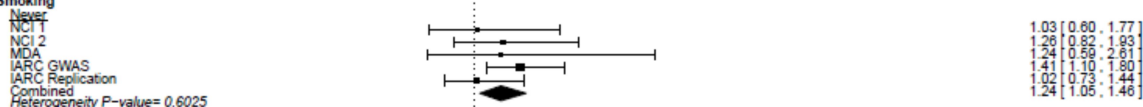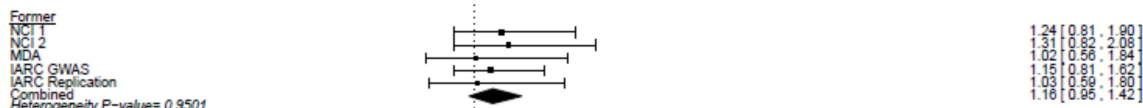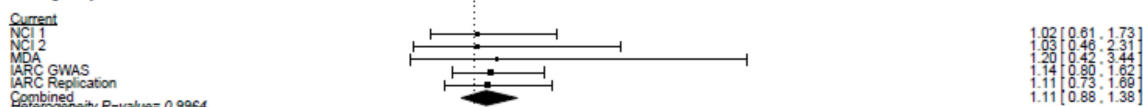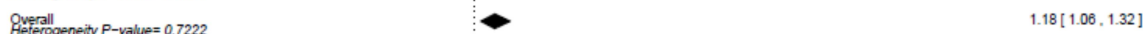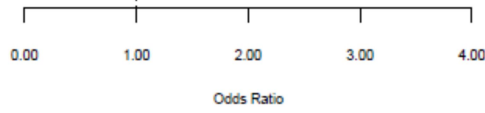

rs7285540

**Body Mass Index**

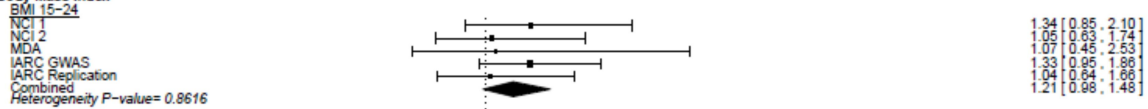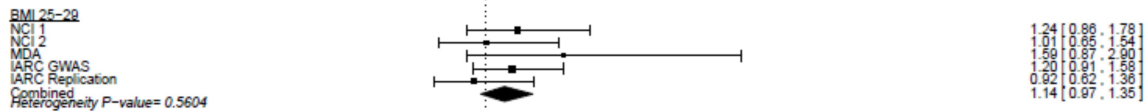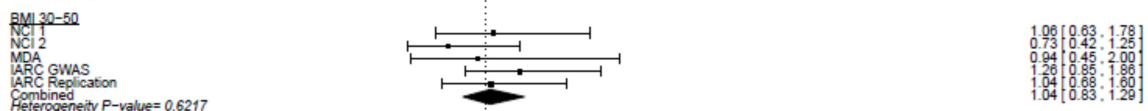

Combined  
Heterogeneity P-value = 0.6065

**Hypertension**

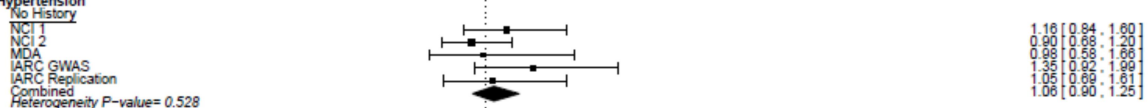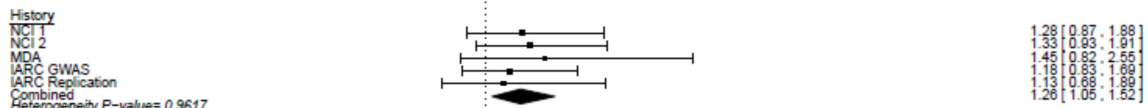

Overall  
Heterogeneity P-value = 0.1736

**Sex**

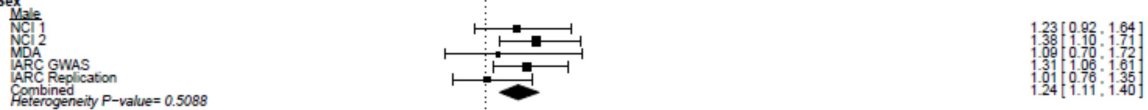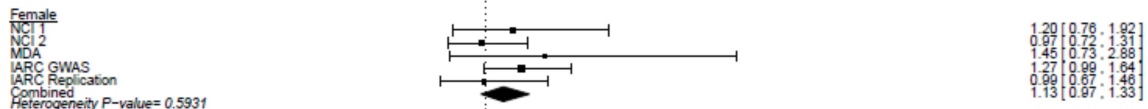

Overall  
Heterogeneity P-value = 0.3559

**Smoking**

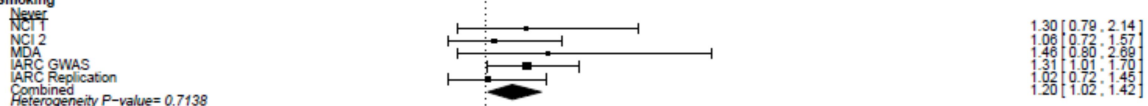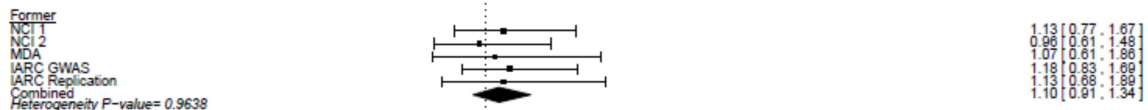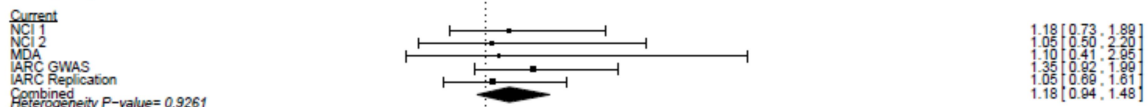

Overall  
Heterogeneity P-value = 0.7988

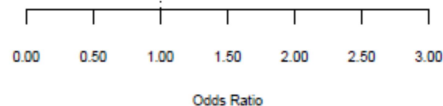



rs67311347

Body Mass Index

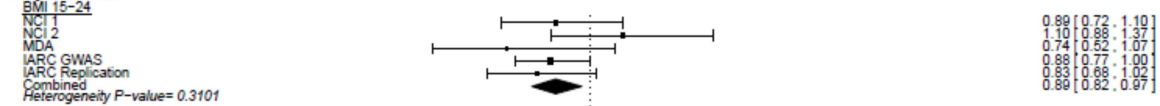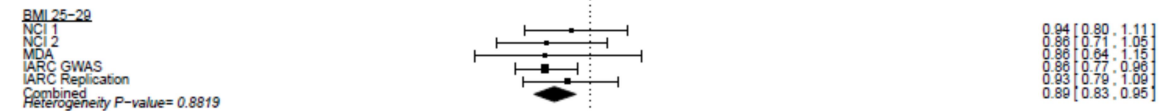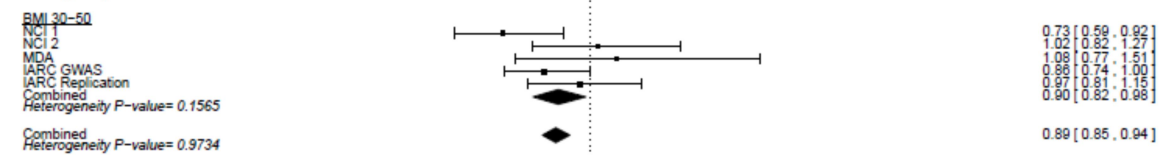

Hypertension

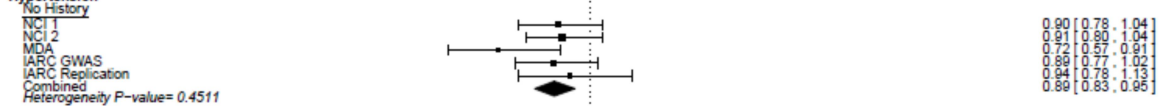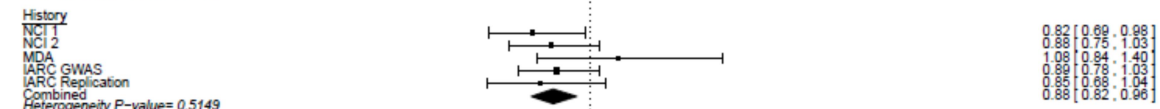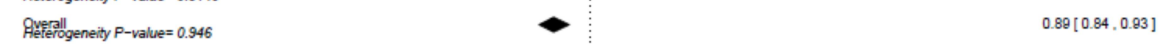

Sex

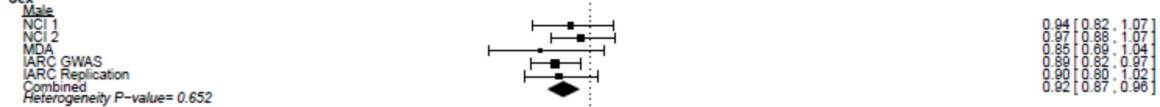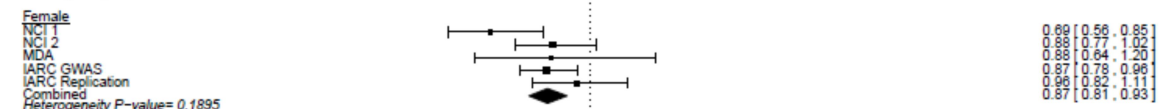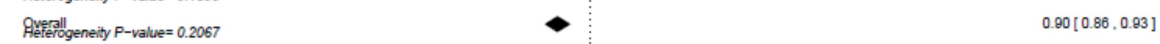

Smoking

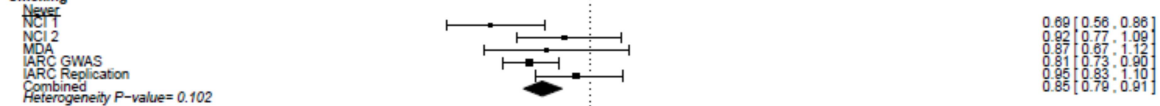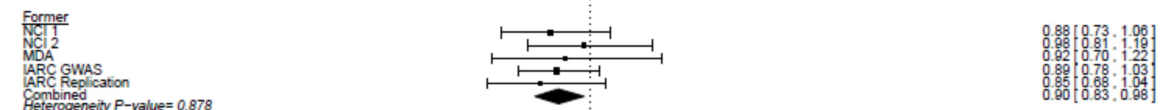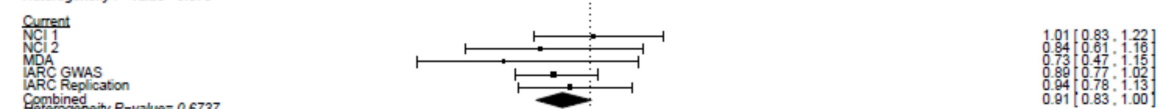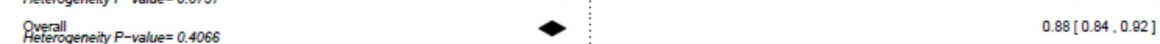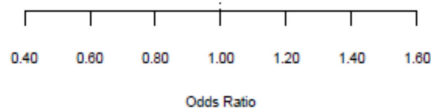

rs2203002

**Body Mass Index**

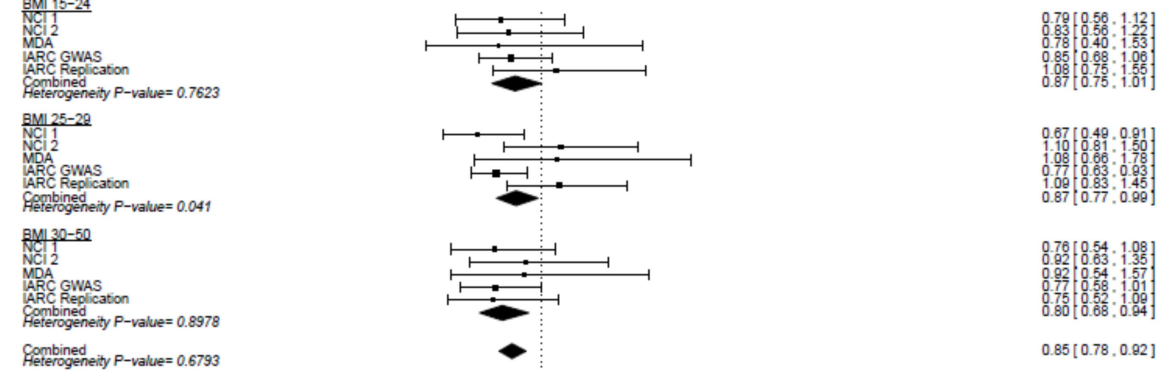

**Hypertension**

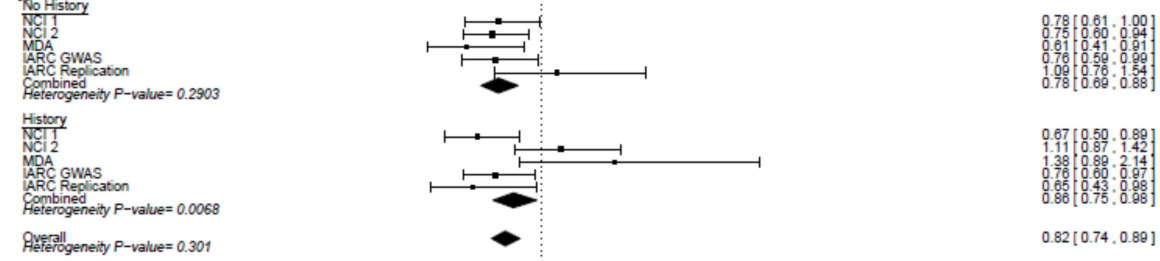

**Sex**

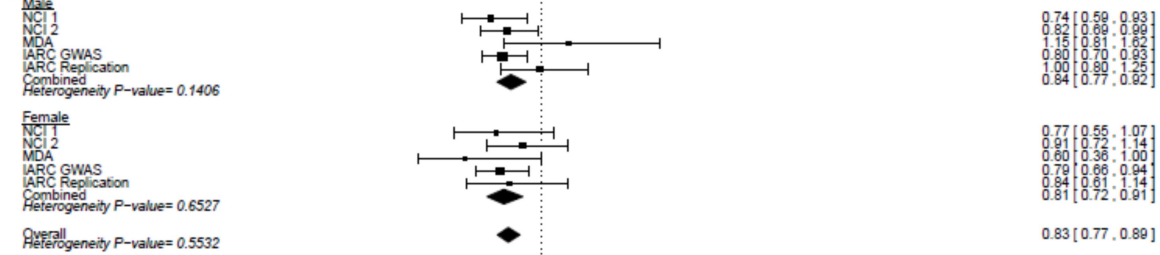

**Smoking**

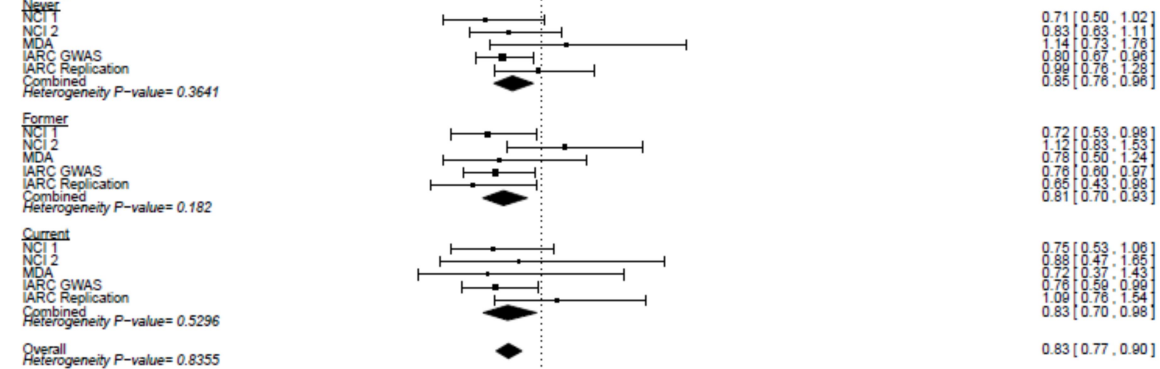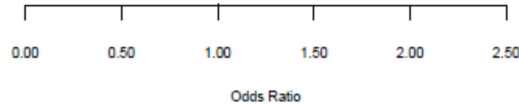

rs10936602

**Body Mass Index**

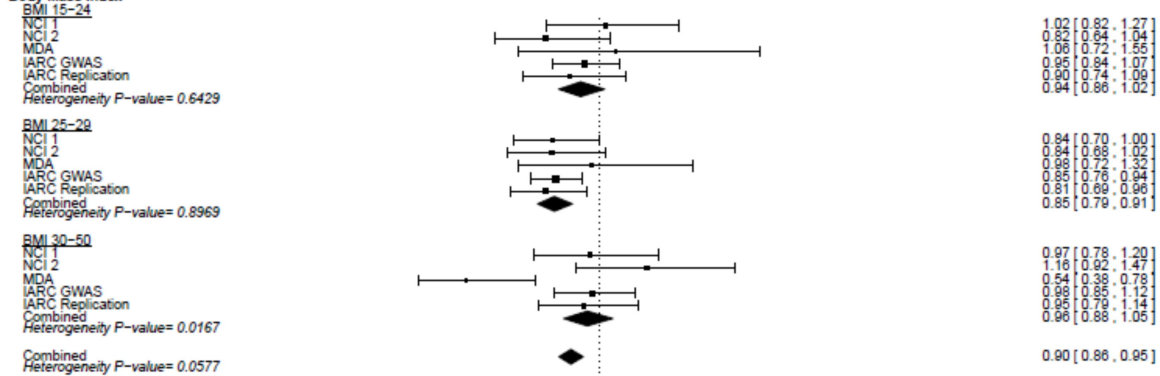

**Hypertension**

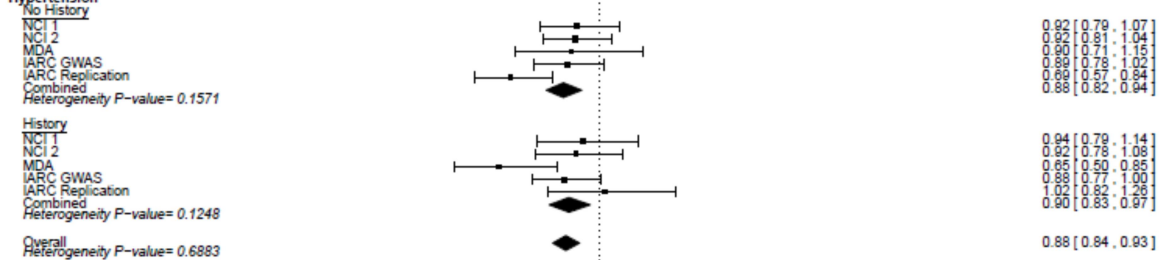

**Sex**

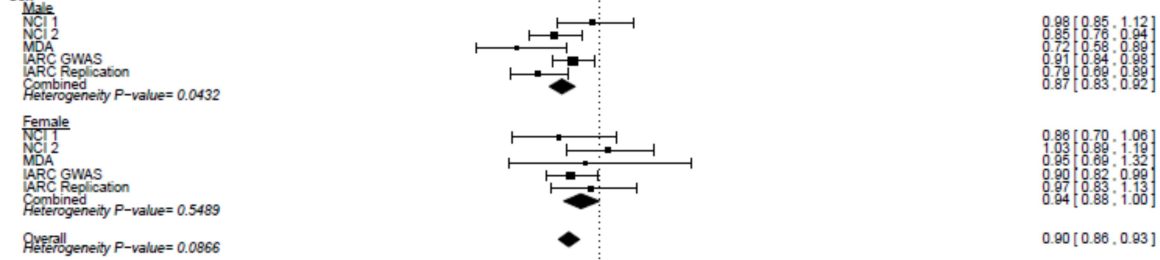

**Smoking**

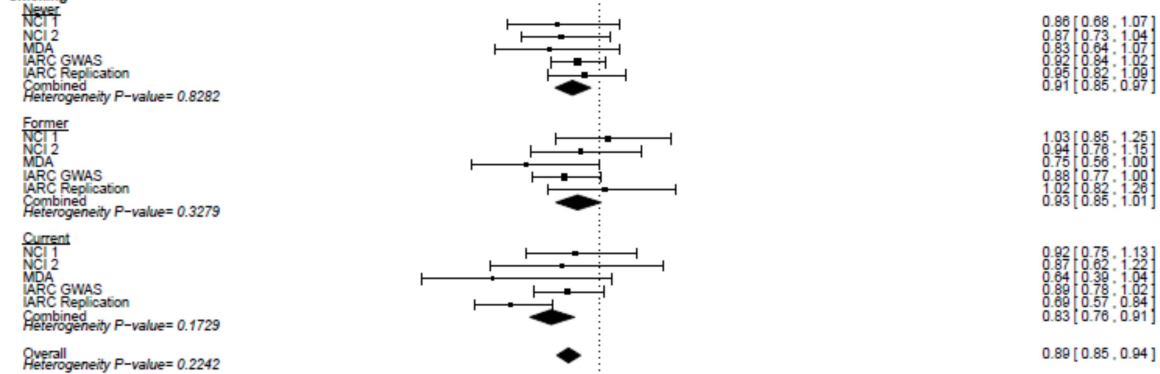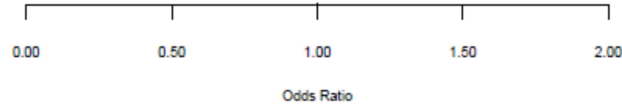

rs234043

**Body Mass Index**

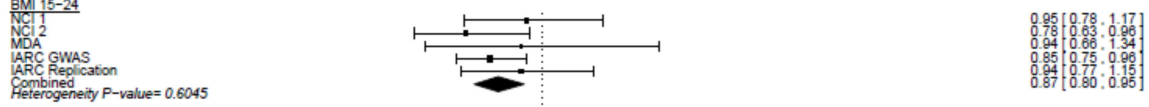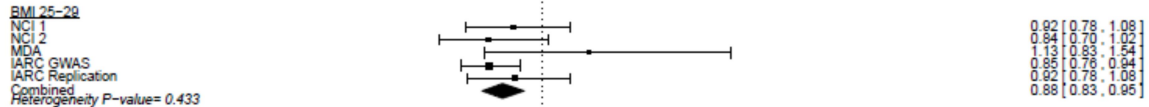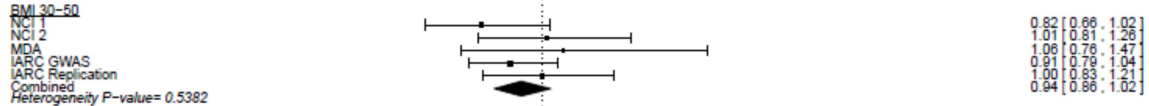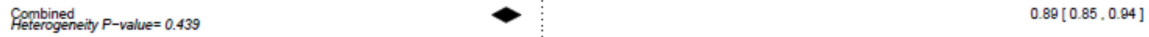

**Hypertension**

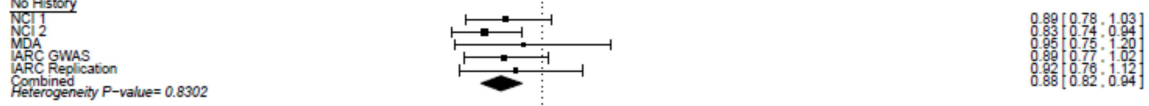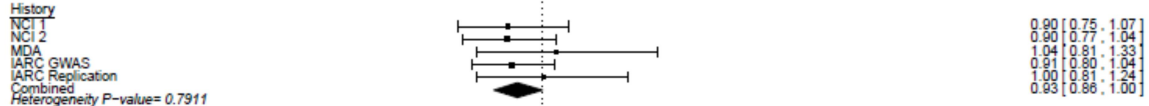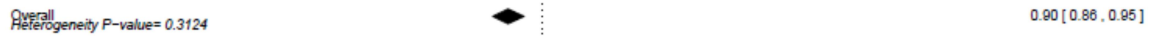

**Sex**

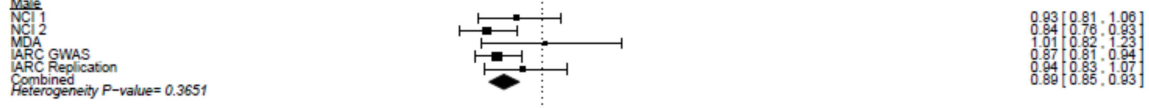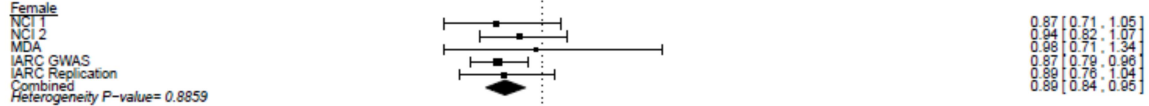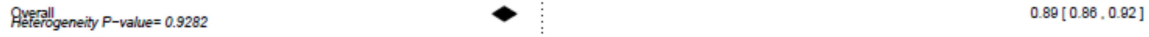

**Smoking**

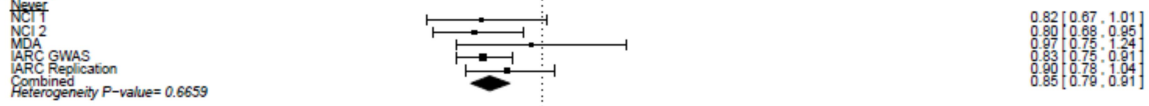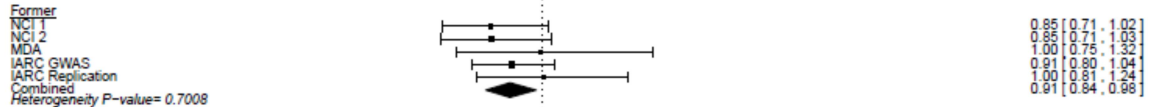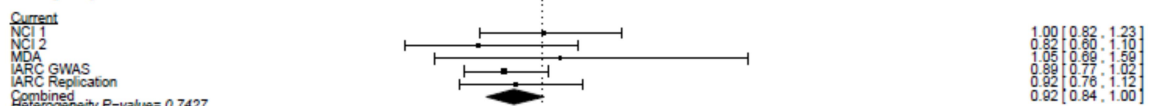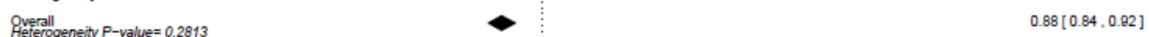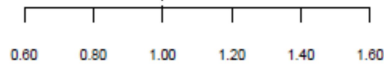

Odds Ratio

rs7697932

Body Mass Index

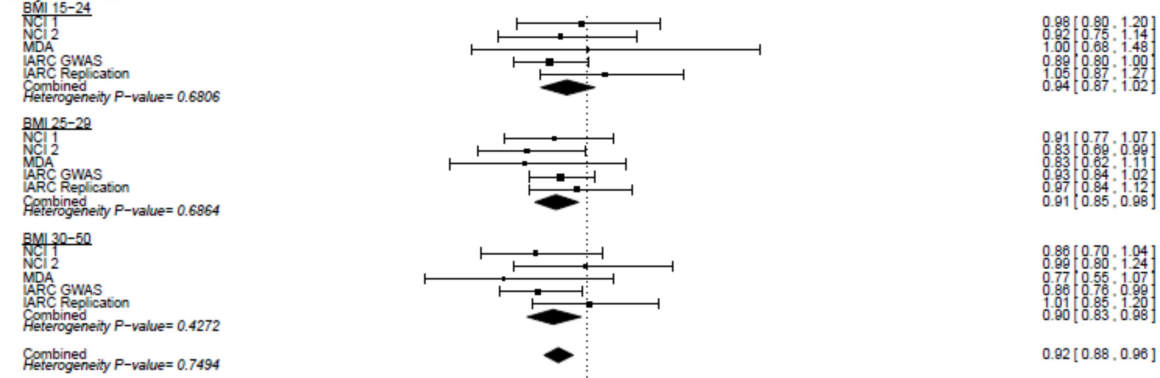

Hypertension

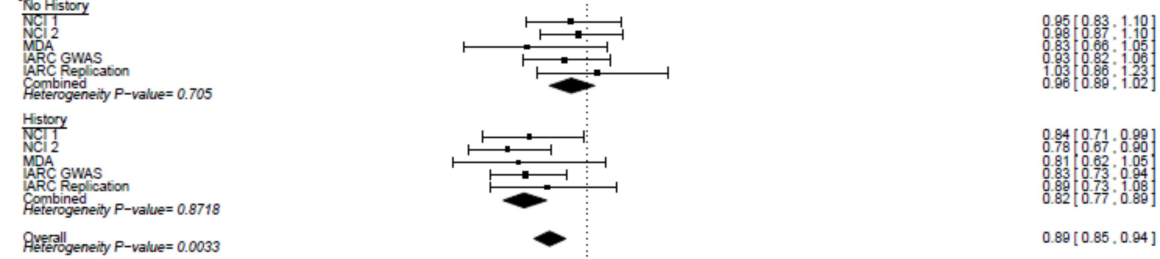

Sex

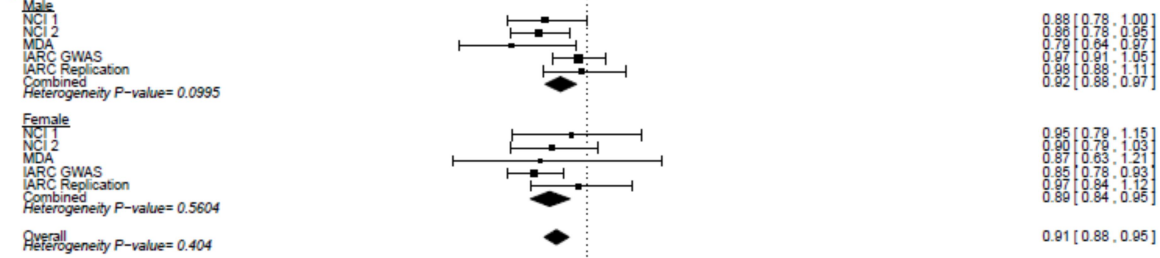

Smoking

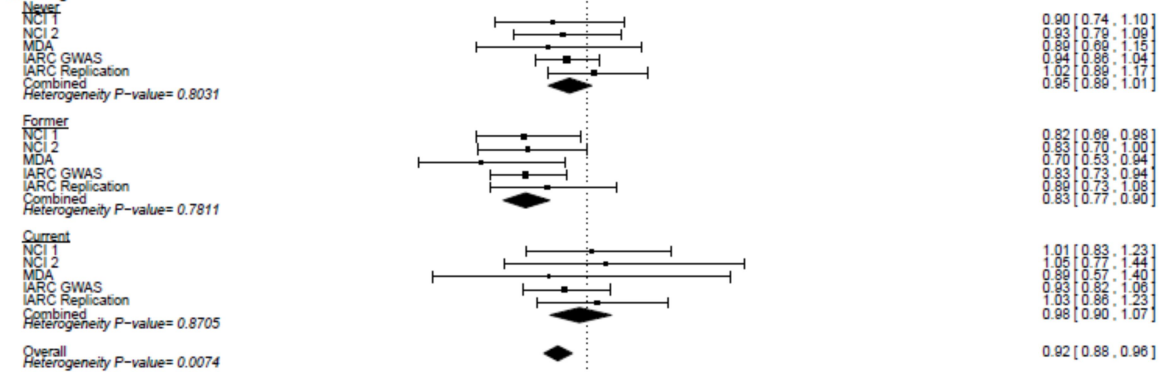

0.40 0.60 0.80 1.00 1.20 1.40 1.60  
Odds Ratio

rs17050872

Body Mass Index

BMI 15-24

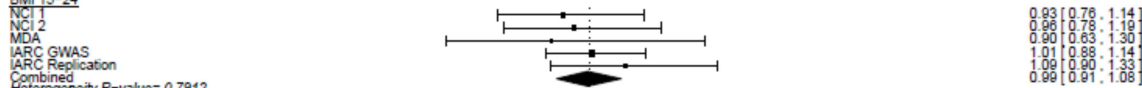

BMI 25-29

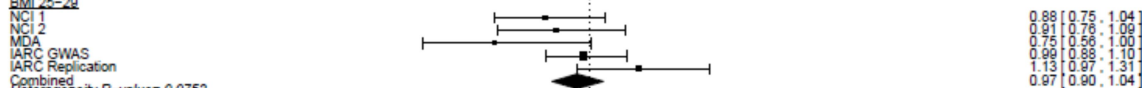

BMI 30-50

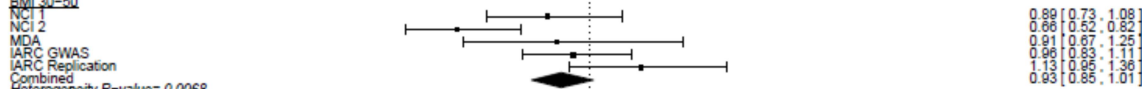

Combined Heterogeneity P-value = 0.5047

Hypertension

No History

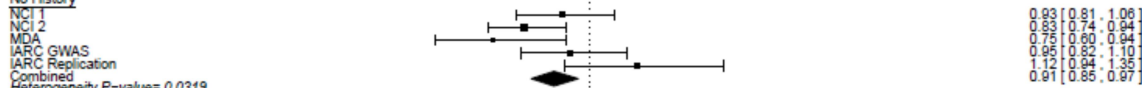

History

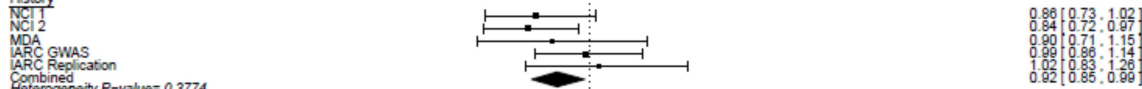

Overall Heterogeneity P-value = 0.8624

Sex

Male

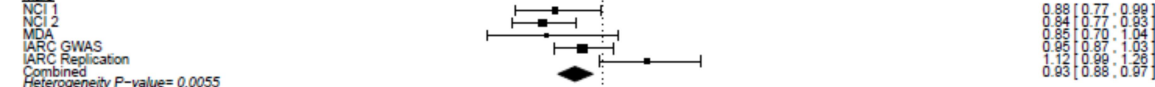

Female

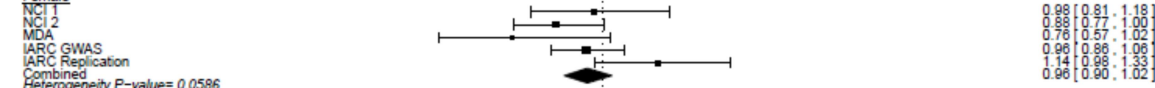

Overall Heterogeneity P-value = 0.4159

Smoking

Never

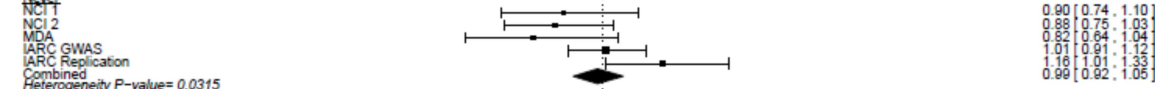

Former

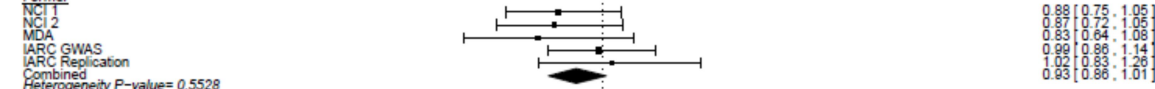

Current

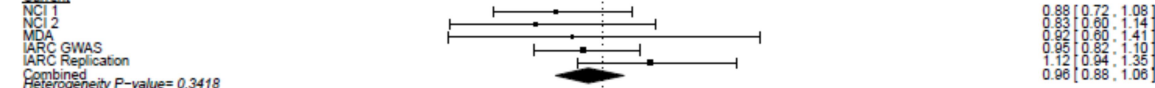

Overall Heterogeneity P-value = 0.5546

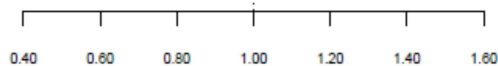

Odds Ratio

rs76912165

**Body Mass Index**

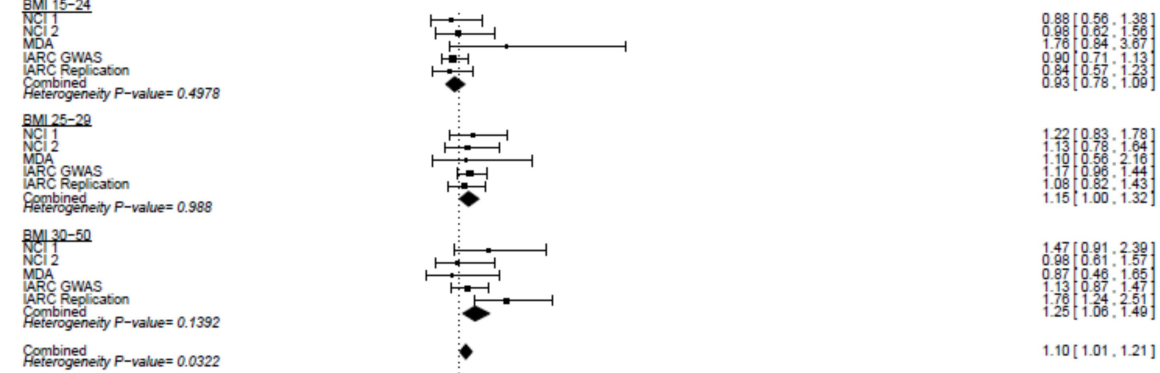

**Hypertension**

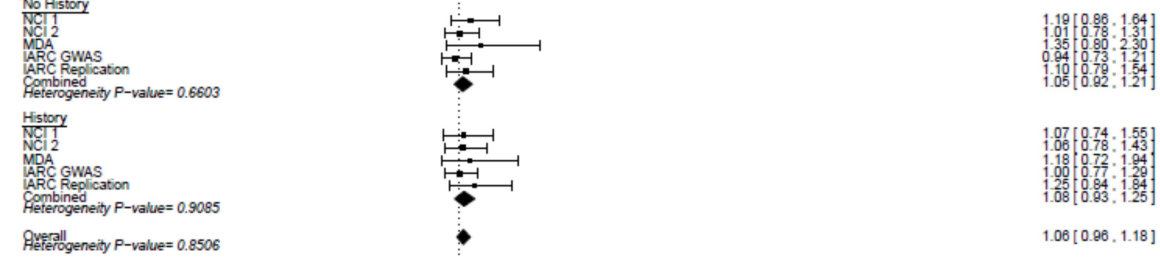

**Sex**

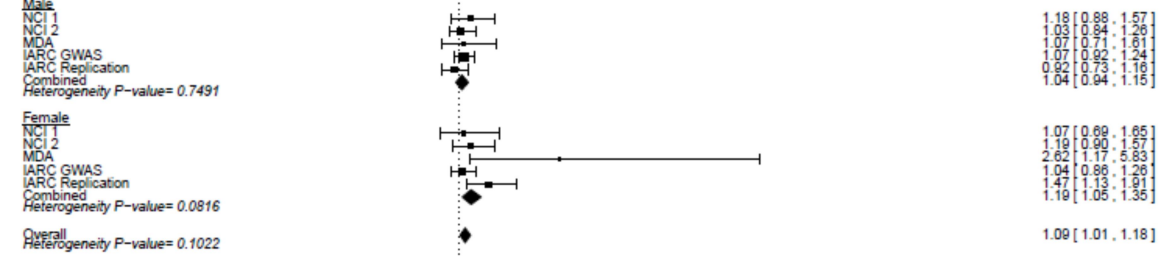

**Smoking**

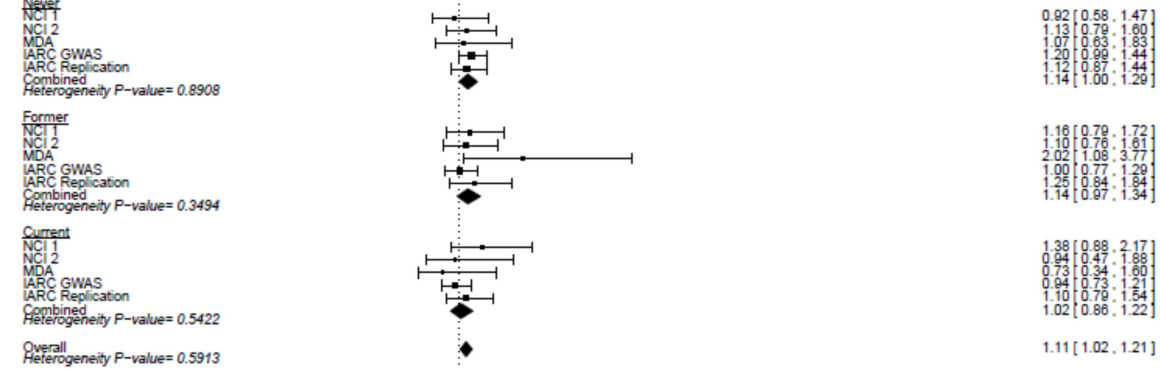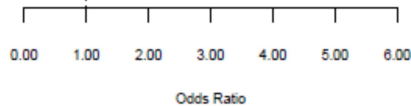

rs1266819

**Body Mass Index**

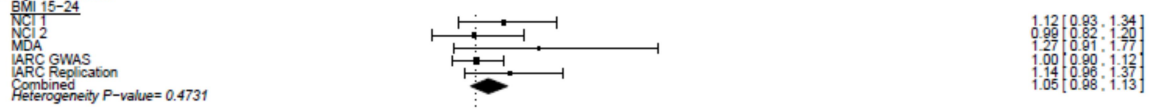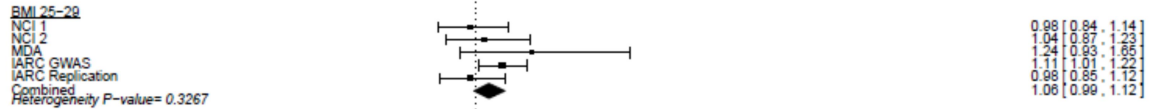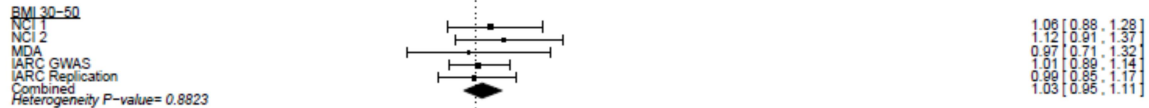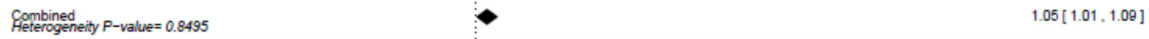

**Hypertension**

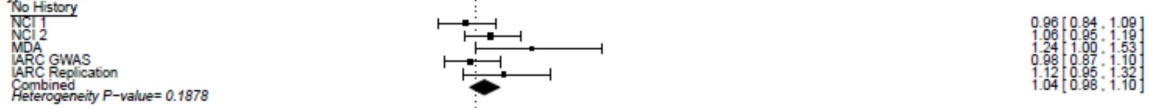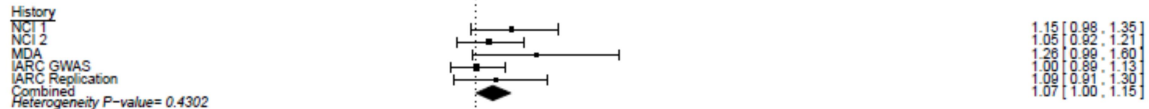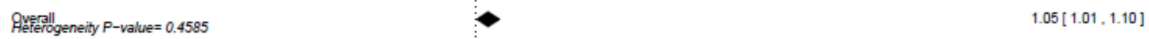

**Sex**

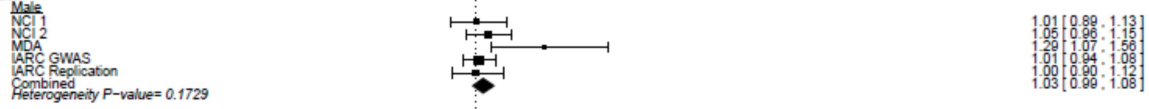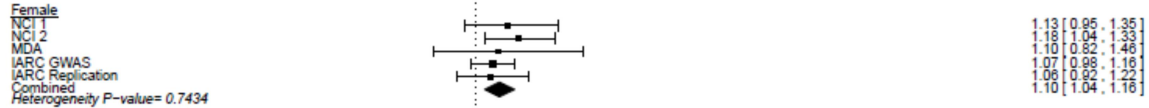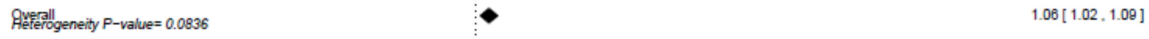

**Smoking**

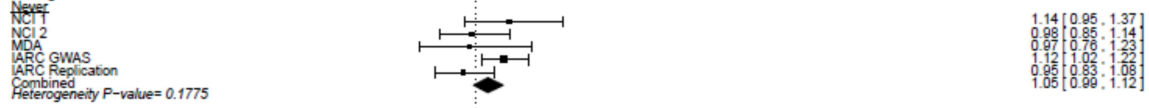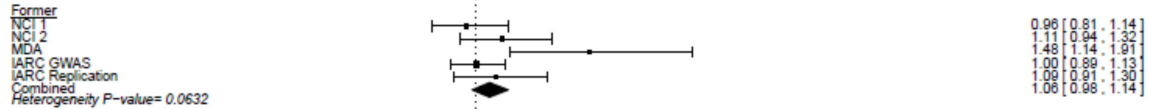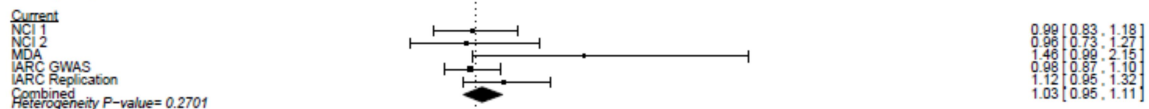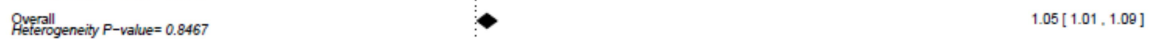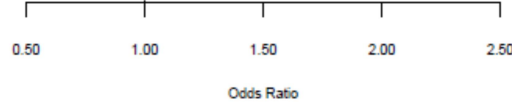



rs59294613

**Body Mass Index**

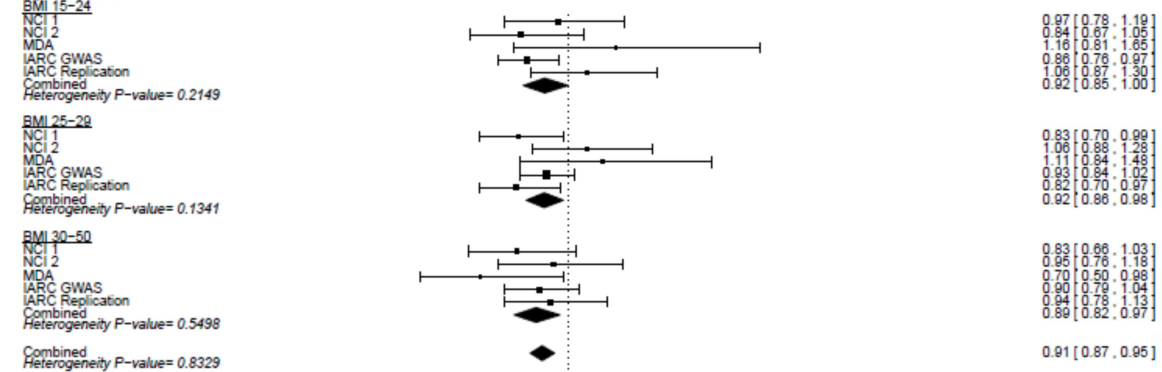

**Hypertension**

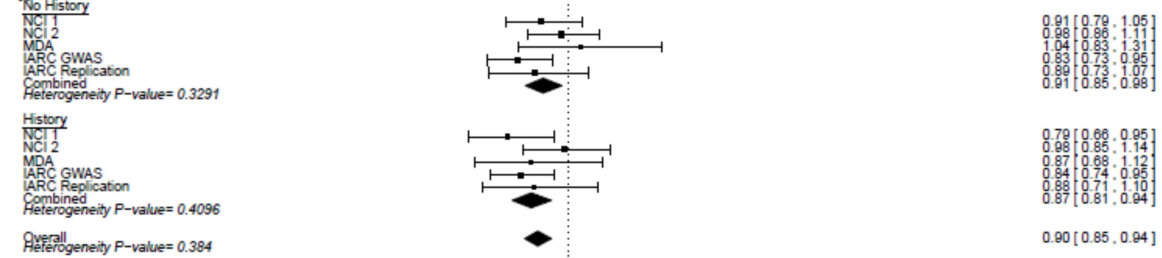

**Sex**

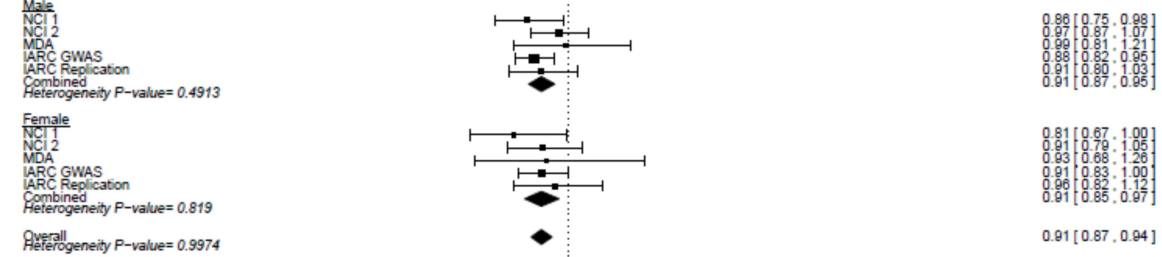

**Smoking**

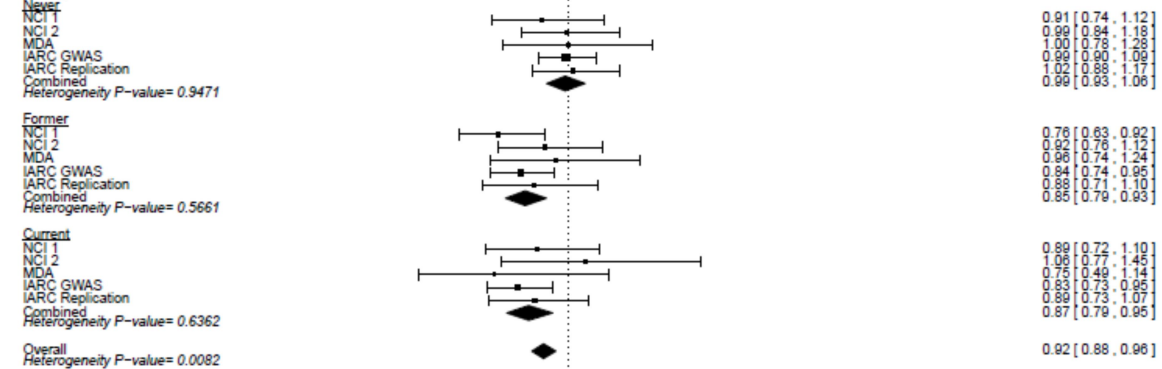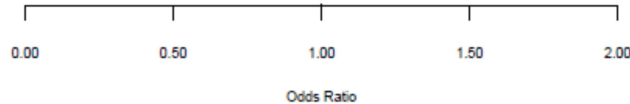

rs73149977

**Body Mass Index**

BMI 15-24

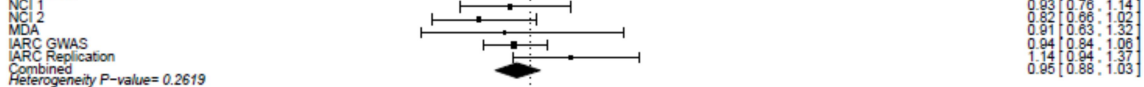

BMI 25-29

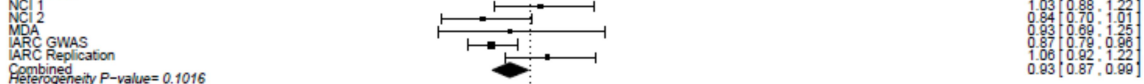

BMI 30-50

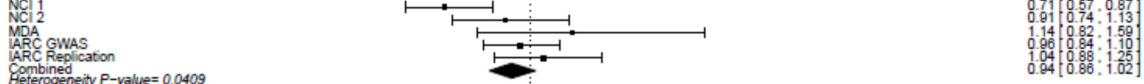

Combined  
Heterogeneity P-value= 0.8895

0.94 [0.90, 0.98]

**Hypertension**

No History

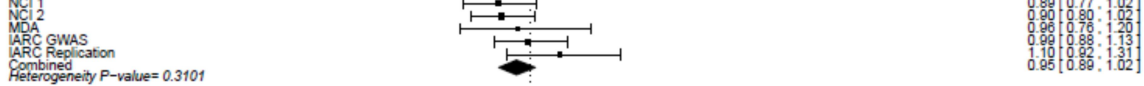

History

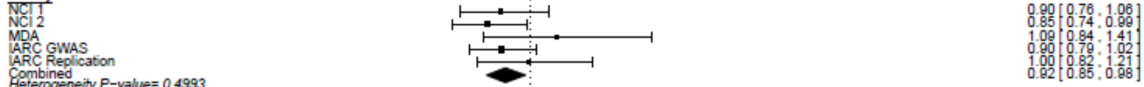

Overall  
Heterogeneity P-value= 0.419

0.94 [0.89, 0.98]

**Sex**

Male

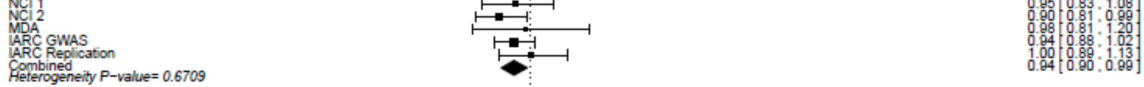

Female

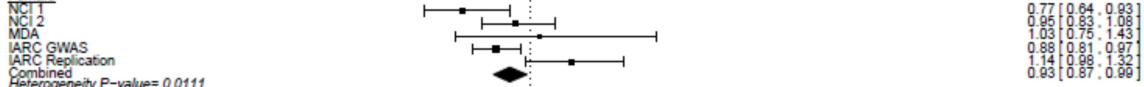

Overall  
Heterogeneity P-value= 0.6981

0.94 [0.90, 0.97]

**Smoking**

Never

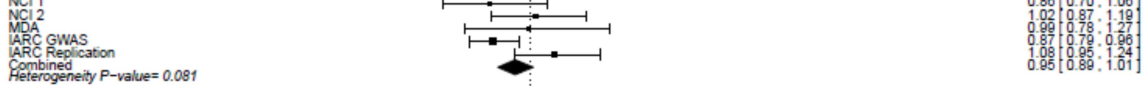

Former

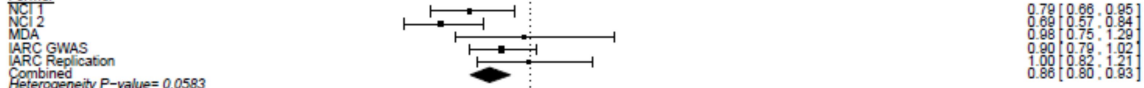

Current

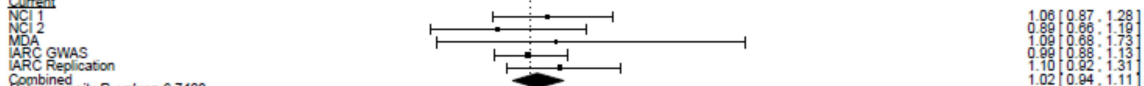

Overall  
Heterogeneity P-value= 0.013

0.94 [0.90, 0.98]

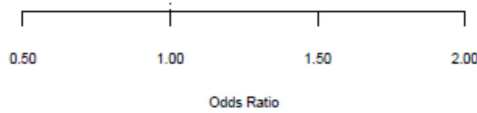

rs2889

**Body Mass Index**

**BMI 15-24**

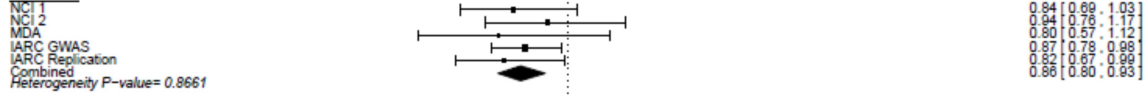

**BMI 25-29**

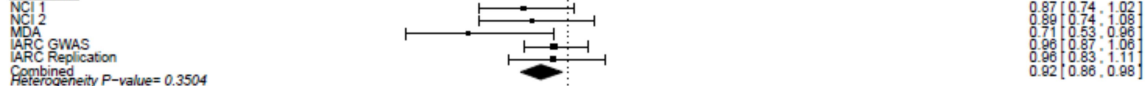

**BMI 30-50**

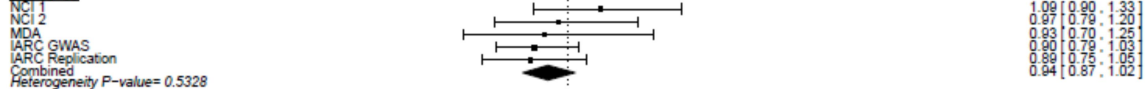

Combined Heterogeneity P-value= 0.2791

**Hypertension**

**No History**

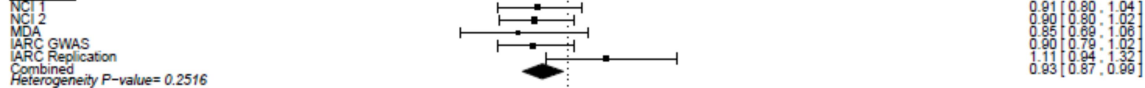

**History**

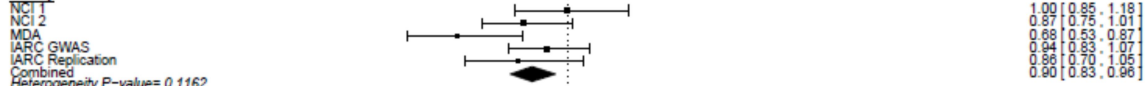

Overall Heterogeneity P-value= 0.5079

**Sex**

**Male**

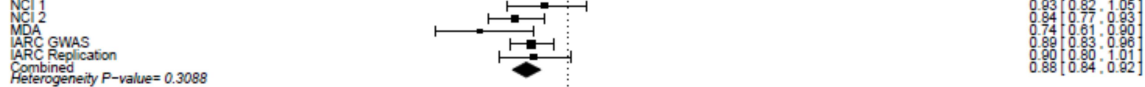

**Female**

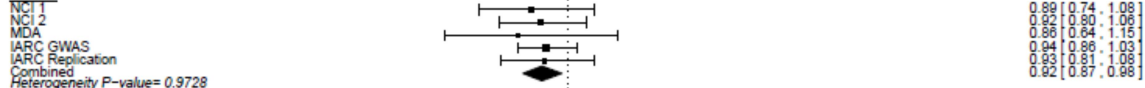

Overall Heterogeneity P-value= 0.2006

**Smoking**

**Never**

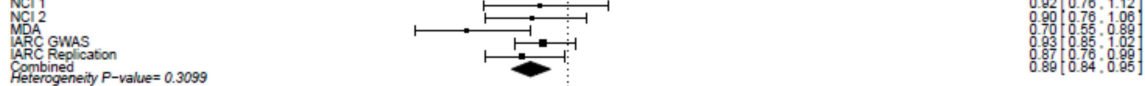

**Former**

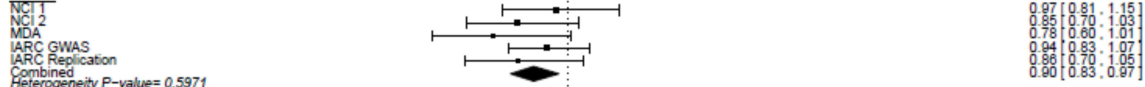

**Current**

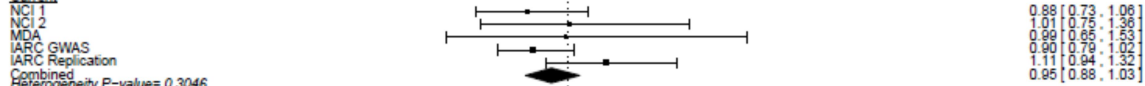

Overall Heterogeneity P-value= 0.4373

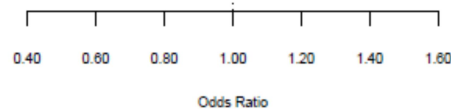

rs2241261

Body Mass Index

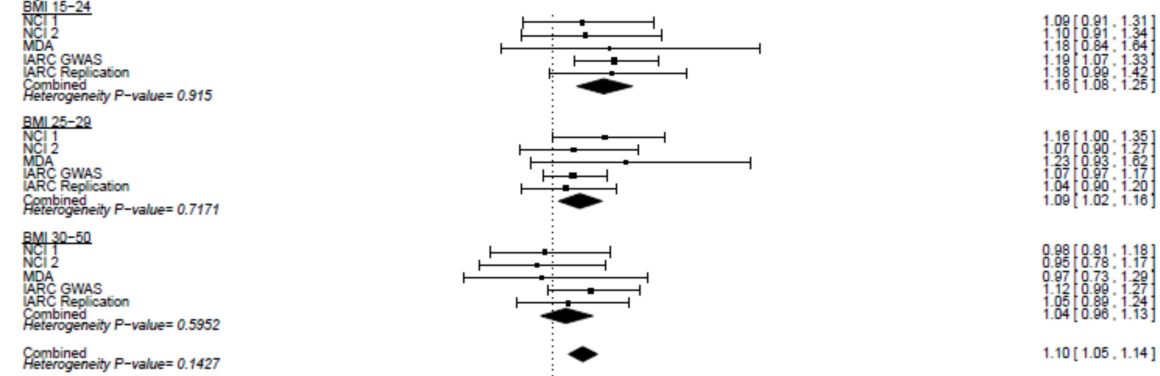

Hypertension

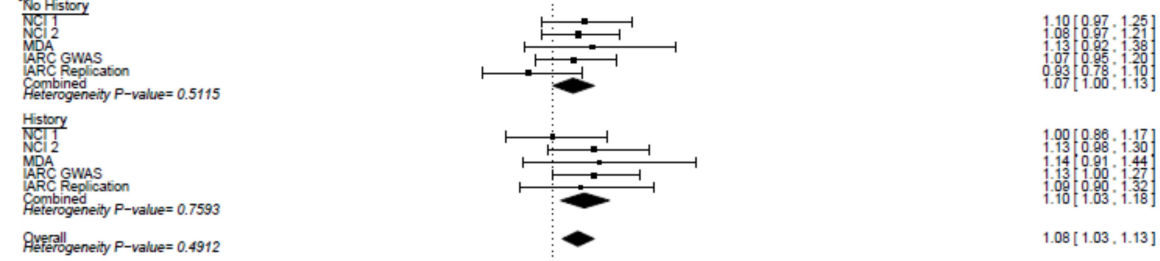

Sex

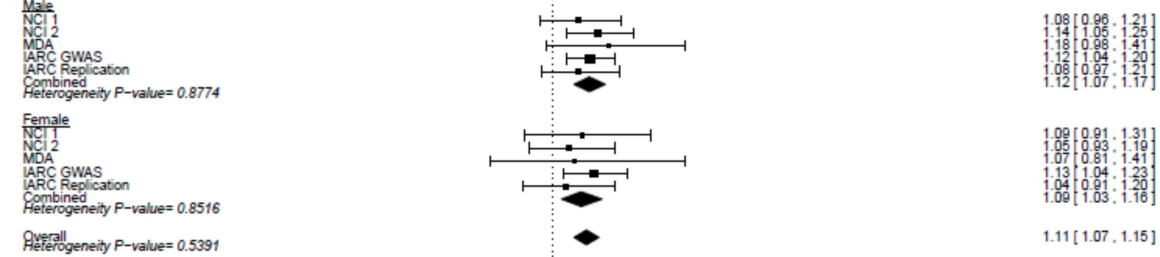

Smoking

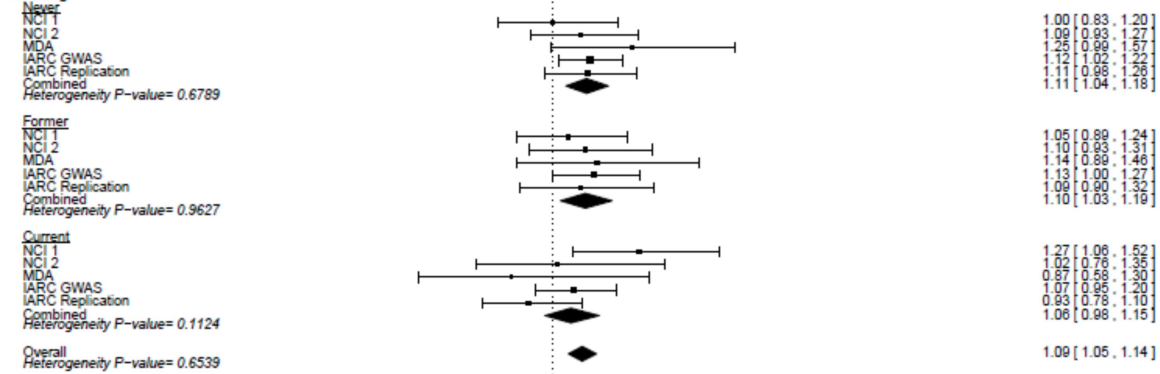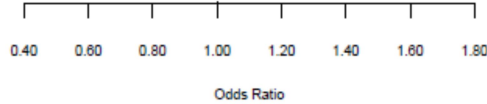

rs7913447

**Body Mass Index**

**BMI 15-24**

|                               |  |                   |
|-------------------------------|--|-------------------|
| NCI 1                         |  | 0.92 [0.76, 1.12] |
| NCI 2                         |  | 1.07 [0.86, 1.31] |
| MDA                           |  | 0.80 [0.56, 1.14] |
| IARC GWAS                     |  | 0.93 [0.83, 1.04] |
| IARC Replication              |  | 0.88 [0.73, 1.06] |
| Combined                      |  | 0.93 [0.86, 1.01] |
| Heterogeneity P-value= 0.6151 |  |                   |

**BMI 25-29**

|                               |  |                   |
|-------------------------------|--|-------------------|
| NCI 1                         |  | 0.92 [0.79, 1.08] |
| NCI 2                         |  | 0.79 [0.66, 0.95] |
| MDA                           |  | 0.75 [0.56, 1.01] |
| IARC GWAS                     |  | 0.95 [0.86, 1.06] |
| IARC Replication              |  | 0.97 [0.84, 1.12] |
| Combined                      |  | 0.93 [0.87, 0.99] |
| Heterogeneity P-value= 0.1704 |  |                   |

**BMI 30-50**

|                               |  |                   |
|-------------------------------|--|-------------------|
| NCI 1                         |  | 0.84 [0.69, 1.03] |
| NCI 2                         |  | 0.84 [0.68, 1.04] |
| MDA                           |  | 0.97 [0.71, 1.32] |
| IARC GWAS                     |  | 0.89 [0.78, 1.02] |
| IARC Replication              |  | 0.95 [0.80, 1.13] |
| Combined                      |  | 0.89 [0.82, 0.97] |
| Heterogeneity P-value= 0.8341 |  |                   |

|                               |  |                   |
|-------------------------------|--|-------------------|
| Combined                      |  | 0.92 [0.88, 0.96] |
| Heterogeneity P-value= 0.7282 |  |                   |

**Hypertension**

**No History**

|                               |  |                   |
|-------------------------------|--|-------------------|
| NCI 1                         |  | 0.88 [0.76, 0.98] |
| NCI 2                         |  | 0.95 [0.81, 1.05] |
| MDA                           |  | 0.81 [0.65, 1.02] |
| IARC GWAS                     |  | 0.97 [0.85, 1.10] |
| IARC Replication              |  | 1.04 [0.87, 1.23] |
| Combined                      |  | 0.92 [0.87, 0.98] |
| Heterogeneity P-value= 0.3192 |  |                   |

**History**

|                               |  |                   |
|-------------------------------|--|-------------------|
| NCI 1                         |  | 0.99 [0.94, 1.17] |
| NCI 2                         |  | 0.90 [0.78, 1.04] |
| MDA                           |  | 0.81 [0.64, 1.03] |
| IARC GWAS                     |  | 0.86 [0.76, 0.97] |
| IARC Replication              |  | 1.07 [0.89, 1.30] |
| Combined                      |  | 0.92 [0.85, 0.99] |
| Heterogeneity P-value= 0.2306 |  |                   |

|                              |  |                   |
|------------------------------|--|-------------------|
| Overall                      |  | 0.92 [0.88, 0.97] |
| Heterogeneity P-value= 0.889 |  |                   |

**Sex**

**Male**

|                              |  |                   |
|------------------------------|--|-------------------|
| NCI 1                        |  | 0.94 [0.83, 1.06] |
| NCI 2                        |  | 0.91 [0.82, 1.00] |
| MDA                          |  | 0.84 [0.69, 1.02] |
| IARC GWAS                    |  | 0.87 [0.77, 1.01] |
| IARC Replication             |  | 0.92 [0.82, 1.02] |
| Combined                     |  | 0.92 [0.88, 0.97] |
| Heterogeneity P-value= 0.837 |  |                   |

**Female**

|                               |  |                   |
|-------------------------------|--|-------------------|
| NCI 1                         |  | 0.88 [0.73, 1.07] |
| NCI 2                         |  | 0.91 [0.80, 1.04] |
| MDA                           |  | 0.74 [0.55, 1.00] |
| IARC GWAS                     |  | 0.95 [0.87, 1.04] |
| IARC Replication              |  | 0.95 [0.85, 1.13] |
| Combined                      |  | 0.93 [0.88, 0.99] |
| Heterogeneity P-value= 0.5173 |  |                   |

|                               |  |                   |
|-------------------------------|--|-------------------|
| Overall                       |  | 0.93 [0.89, 0.96] |
| Heterogeneity P-value= 0.8155 |  |                   |

**Smoking**

**Never**

|                              |  |                   |
|------------------------------|--|-------------------|
| NCI 1                        |  | 0.79 [0.64, 0.95] |
| NCI 2                        |  | 0.87 [0.75, 1.02] |
| MDA                          |  | 0.74 [0.58, 0.94] |
| IARC GWAS                    |  | 0.99 [0.90, 1.09] |
| IARC Replication             |  | 0.87 [0.77, 0.99] |
| Combined                     |  | 0.90 [0.85, 0.96] |
| Heterogeneity P-value= 0.068 |  |                   |

**Former**

|                               |  |                   |
|-------------------------------|--|-------------------|
| NCI 1                         |  | 0.95 [0.90, 1.13] |
| NCI 2                         |  | 0.95 [0.72, 1.04] |
| MDA                           |  | 0.83 [0.64, 1.07] |
| IARC GWAS                     |  | 0.86 [0.76, 0.97] |
| IARC Replication              |  | 1.07 [0.89, 1.30] |
| Combined                      |  | 0.91 [0.84, 0.98] |
| Heterogeneity P-value= 0.3175 |  |                   |

**Current**

|                               |  |                   |
|-------------------------------|--|-------------------|
| NCI 1                         |  | 0.97 [0.81, 1.17] |
| NCI 2                         |  | 0.96 [0.71, 1.29] |
| MDA                           |  | 1.09 [0.70, 1.65] |
| IARC GWAS                     |  | 0.97 [0.85, 1.10] |
| IARC Replication              |  | 1.04 [0.87, 1.23] |
| Combined                      |  | 0.99 [0.91, 1.08] |
| Heterogeneity P-value= 0.9614 |  |                   |

|                               |  |                   |
|-------------------------------|--|-------------------|
| Overall                       |  | 0.92 [0.89, 0.96] |
| Heterogeneity P-value= 0.1781 |  |                   |

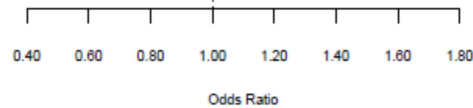

rs11813268

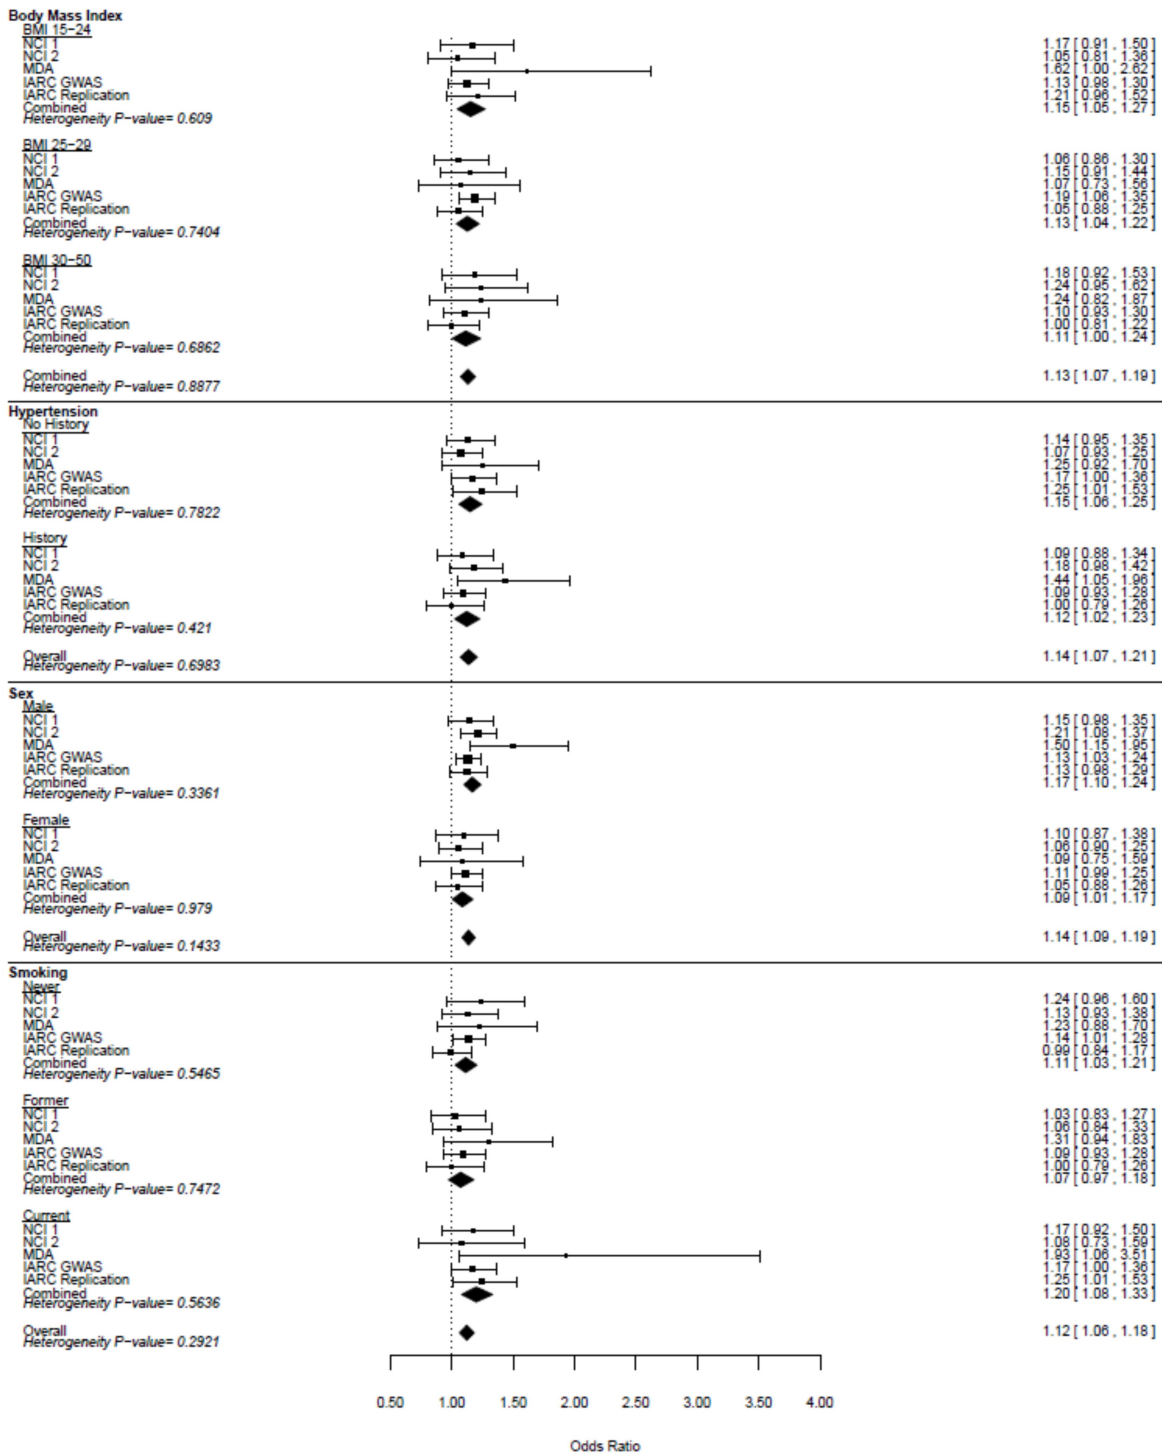

rs7774900

**Body Mass Index**

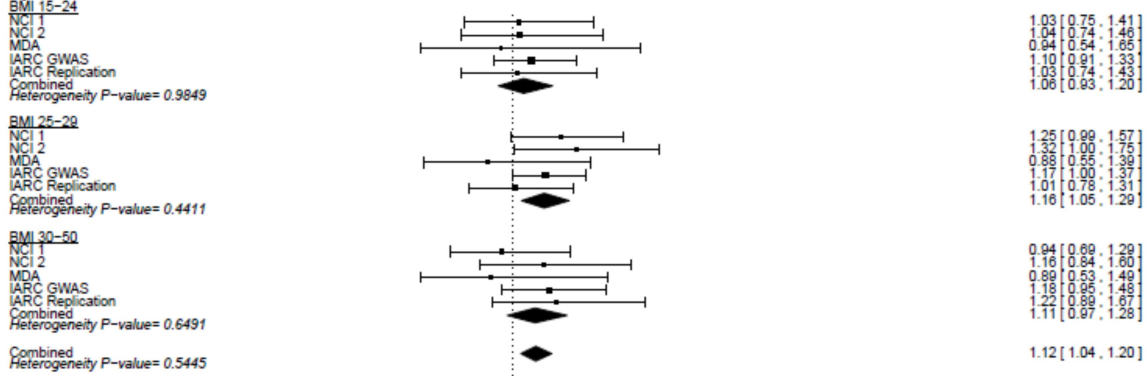

**Hypertension**

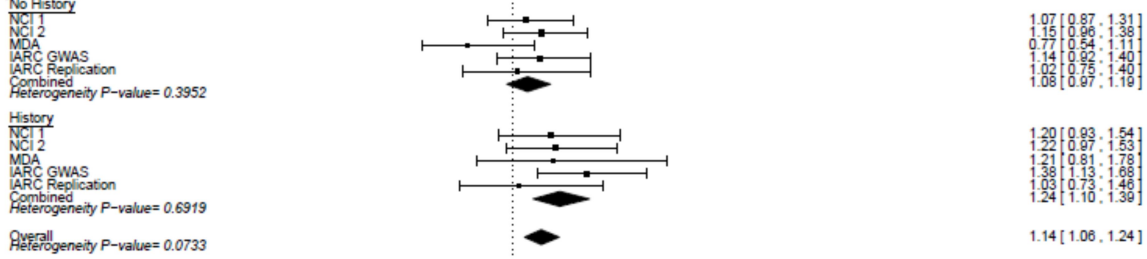

**Sex**

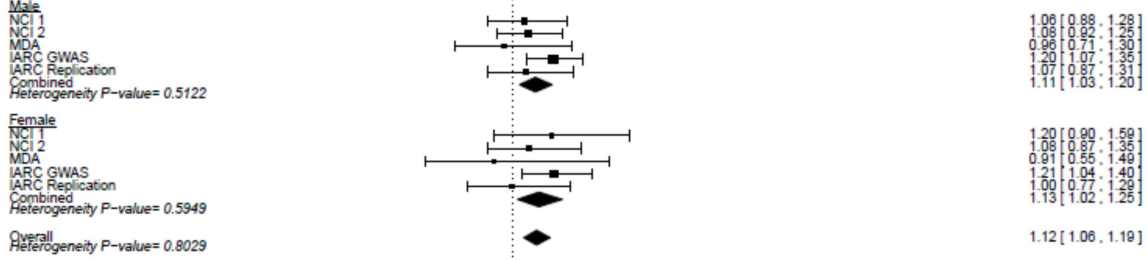

**Smoking**

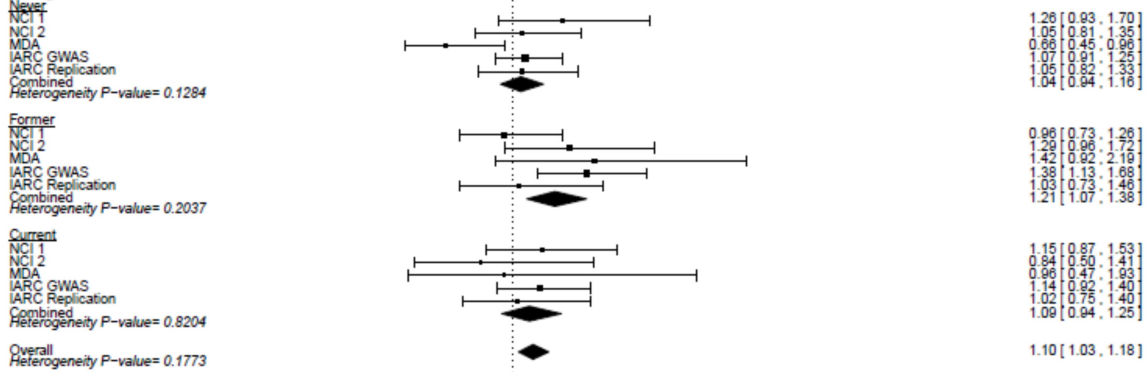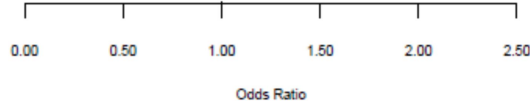

rs1800057

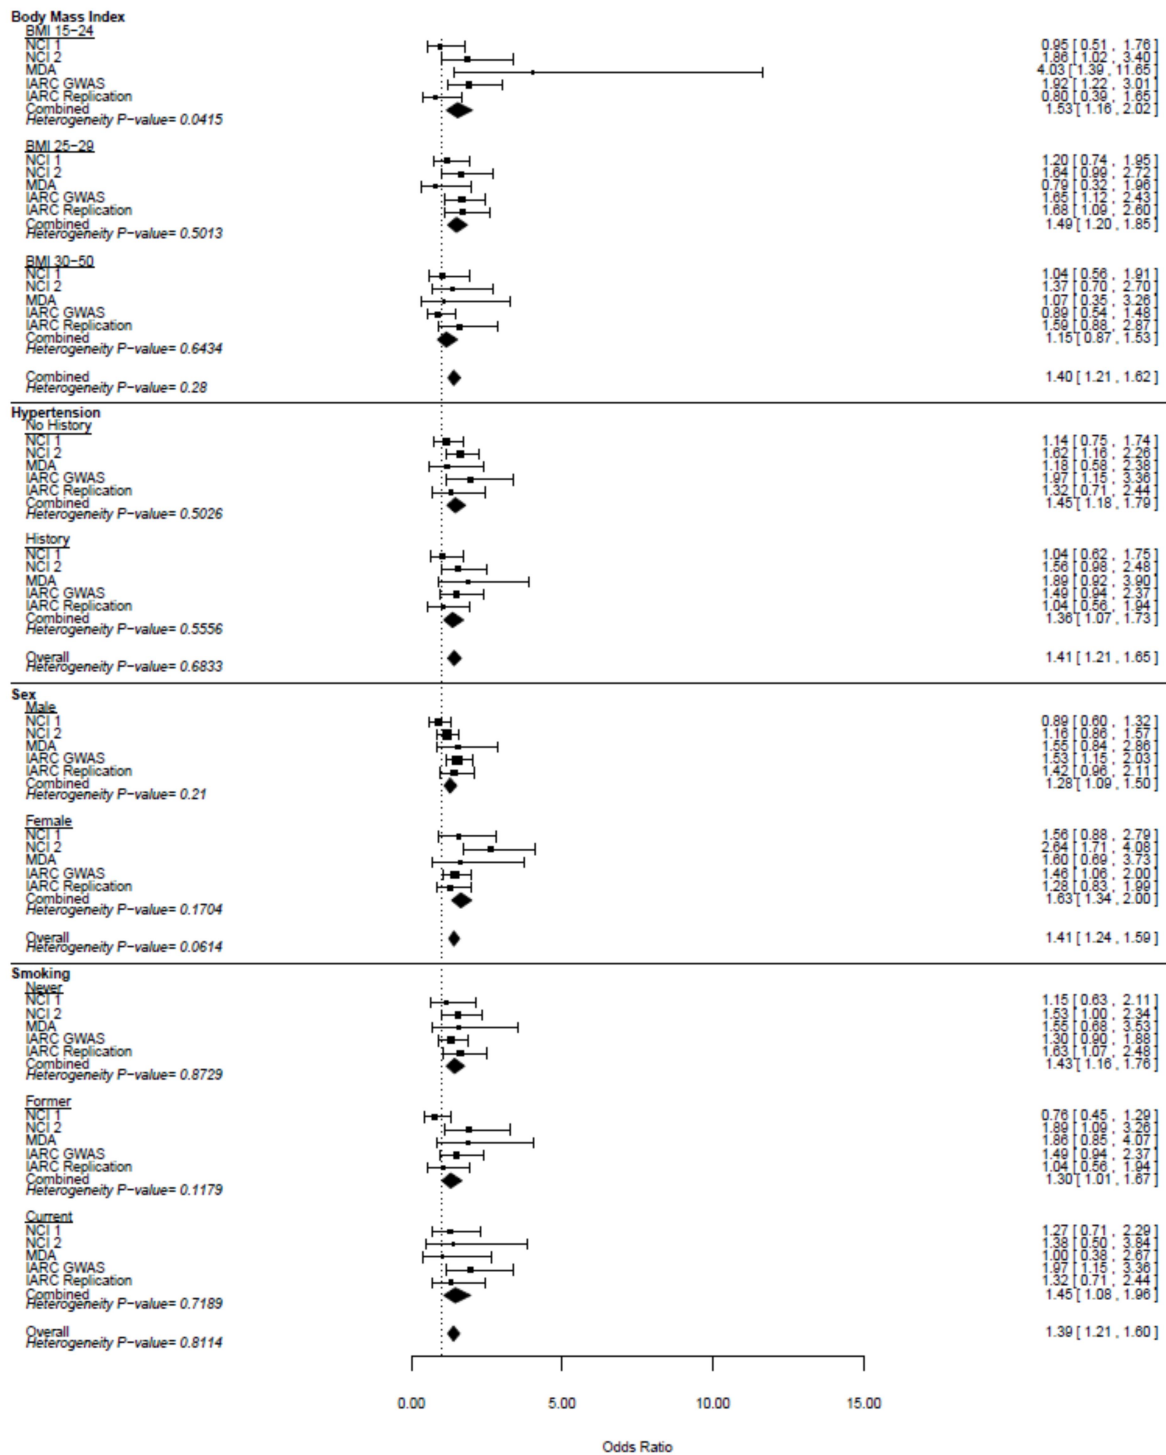



rs74911261

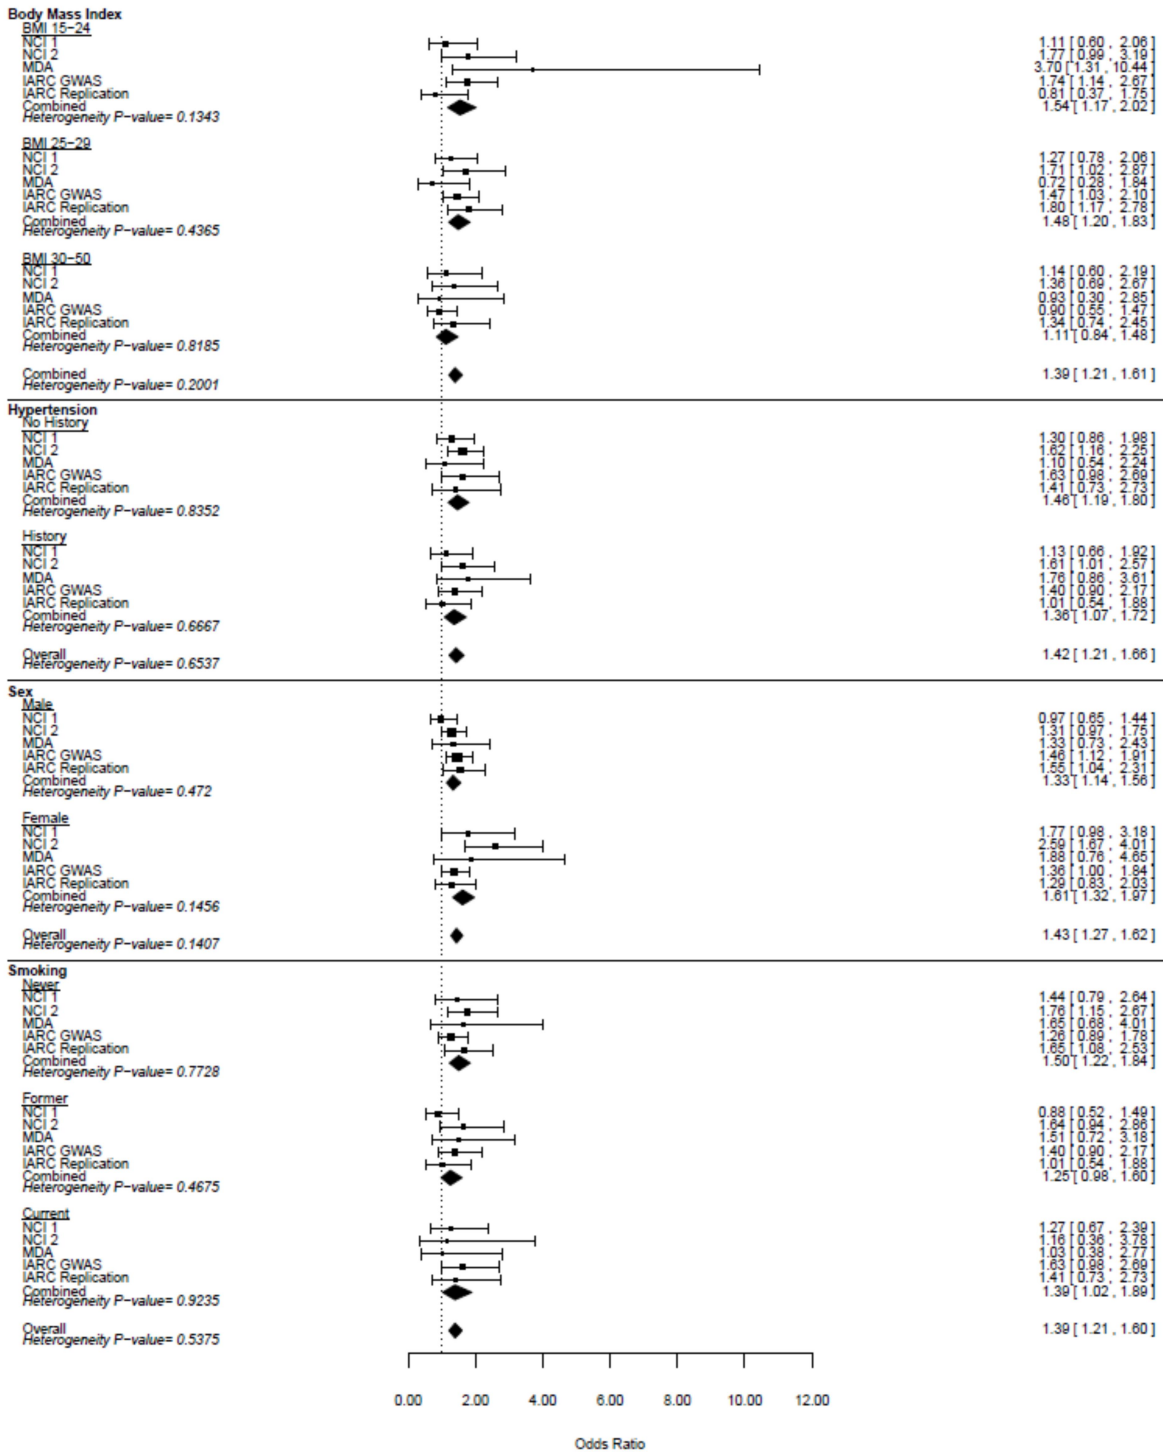

rs77736197

**Body Mass Index**

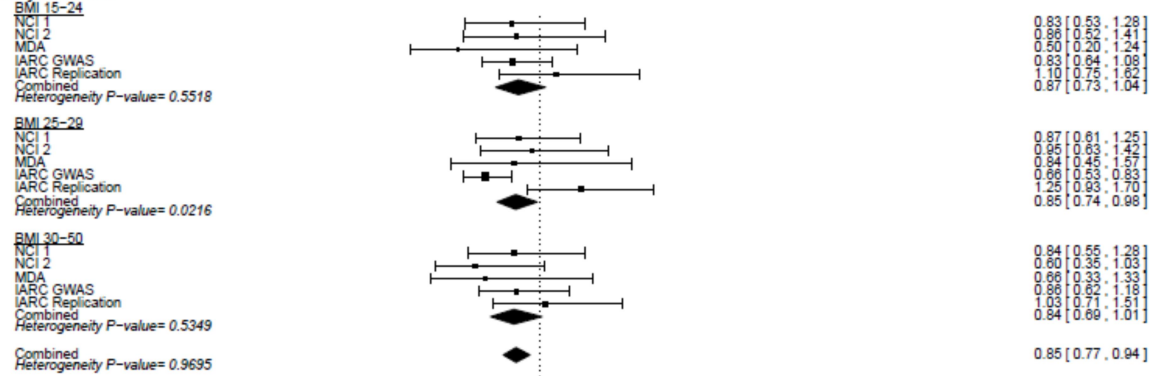

**Hypertension**

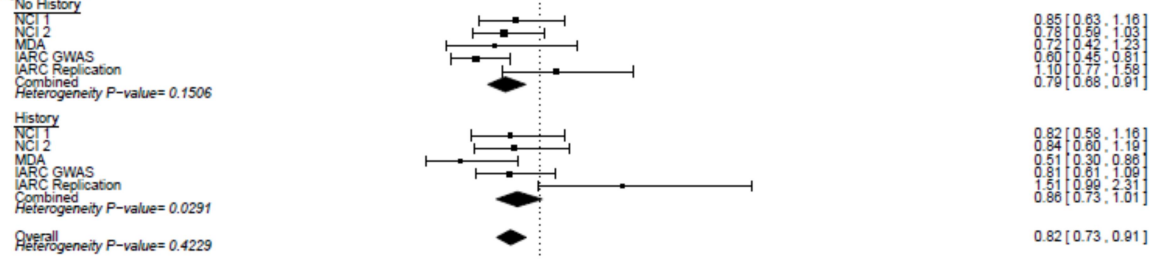

**Sex**

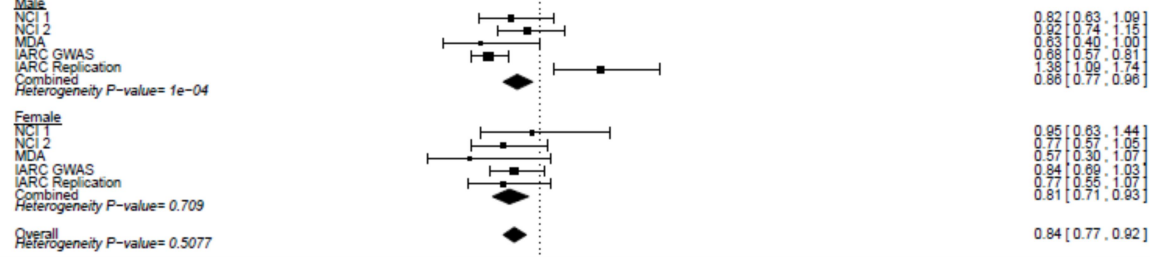

**Smoking**

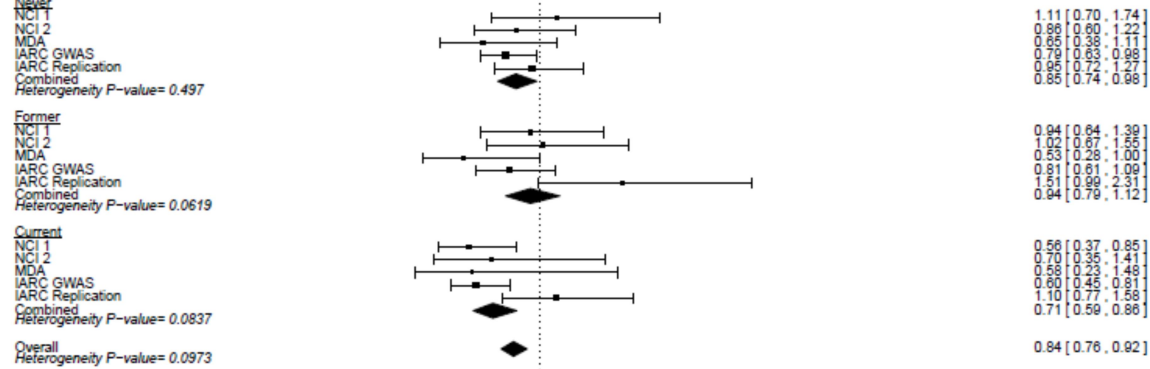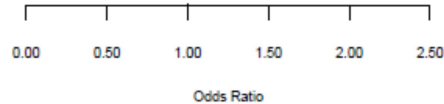

rs72730336

**Body Mass Index**

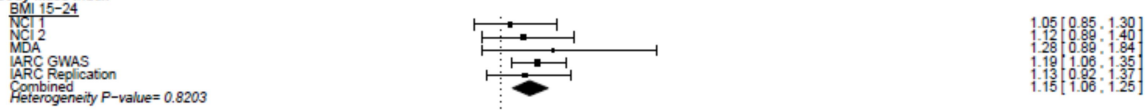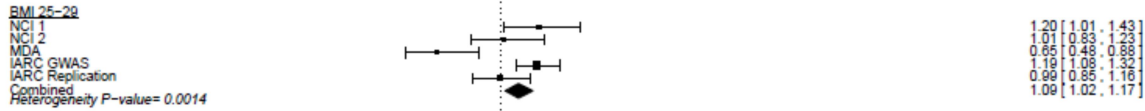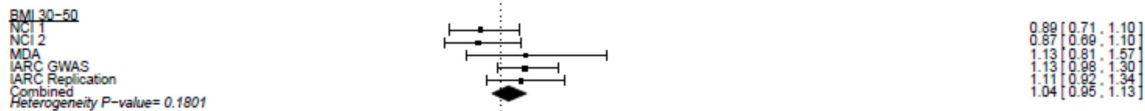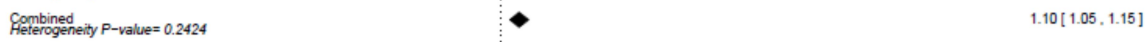

**Hypertension**

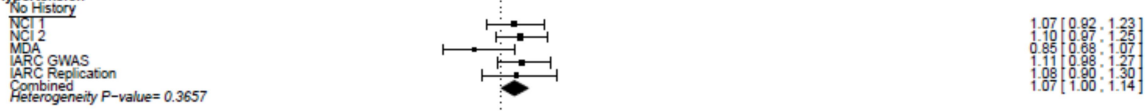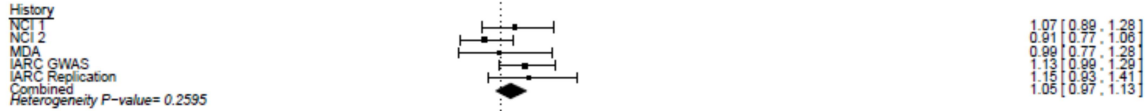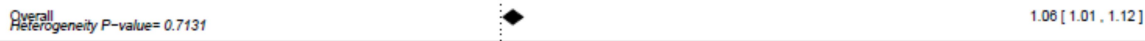

**Sex**

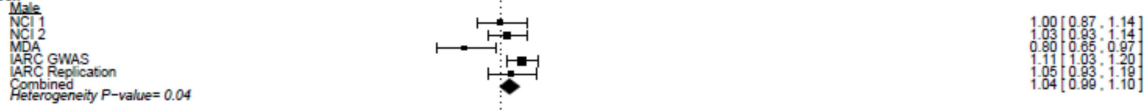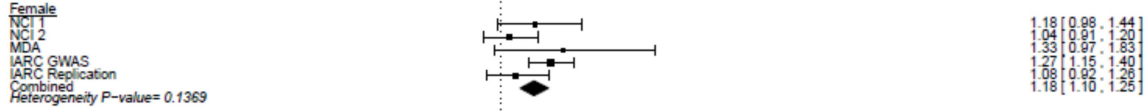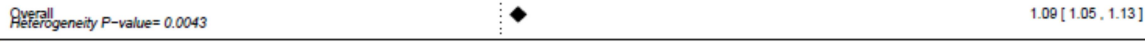

**Smoking**

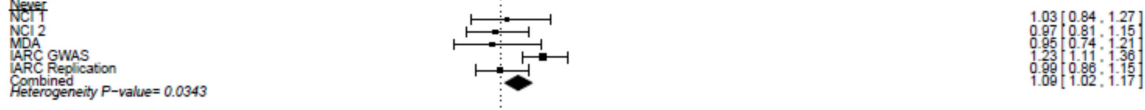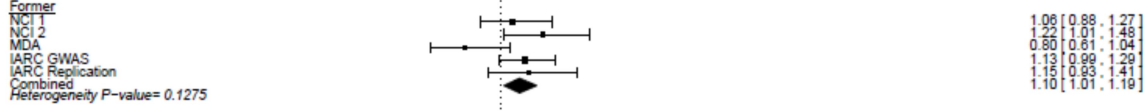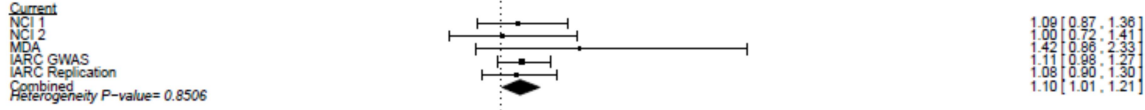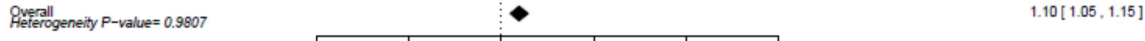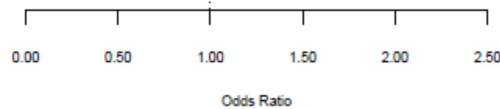

rs8007348

**Body Mass Index**

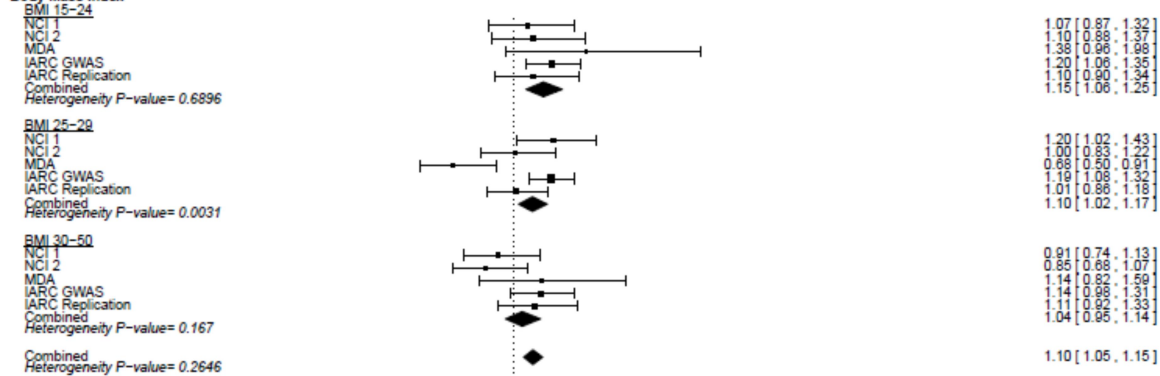

**Hypertension**

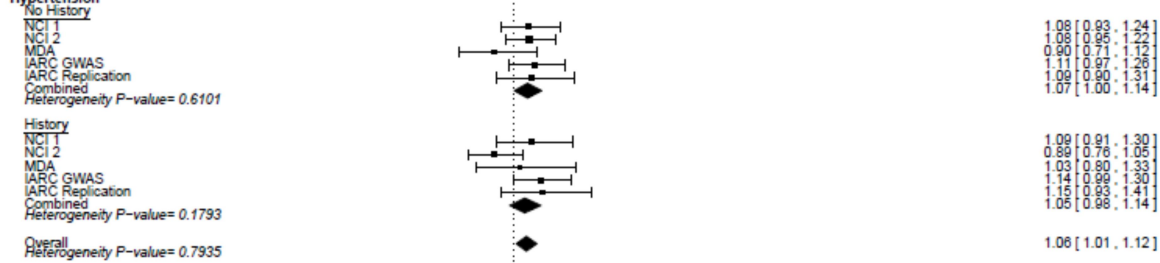

**Sex**

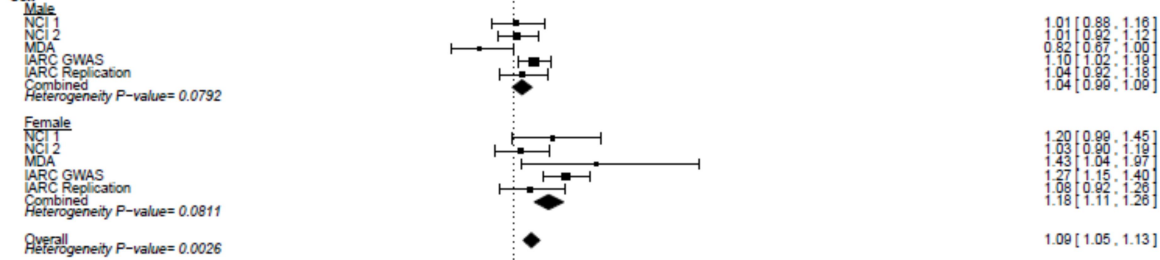

**Smoking**

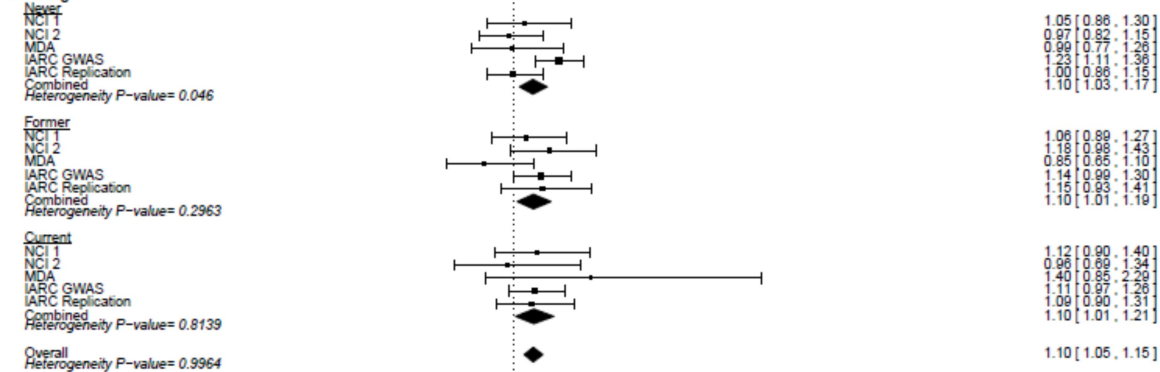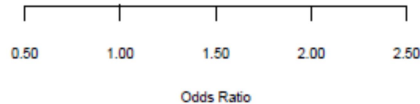

rs4903064

**Body Mass Index**

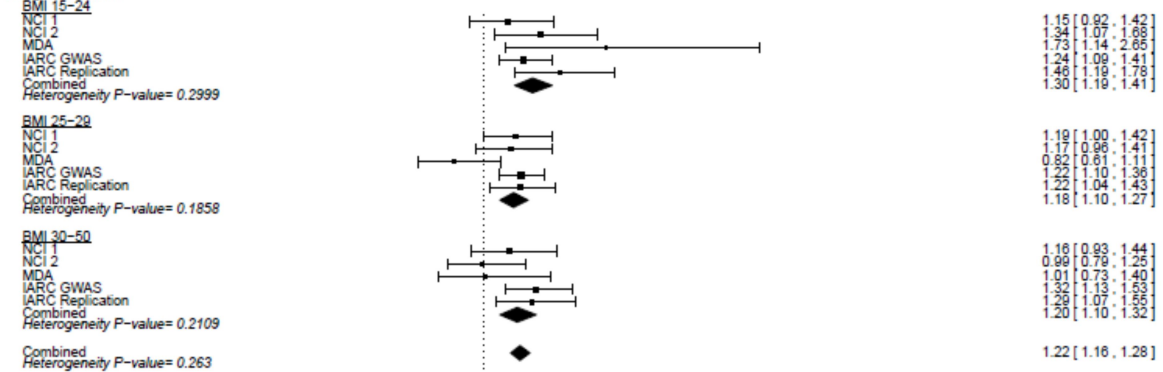

**Hypertension**

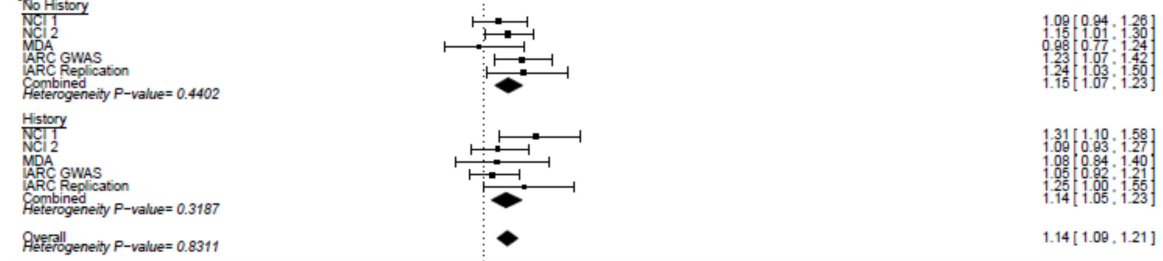

**Sex**

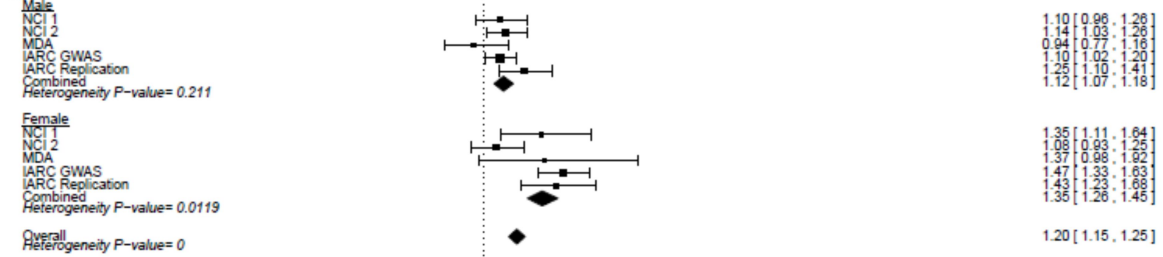

**Smoking**

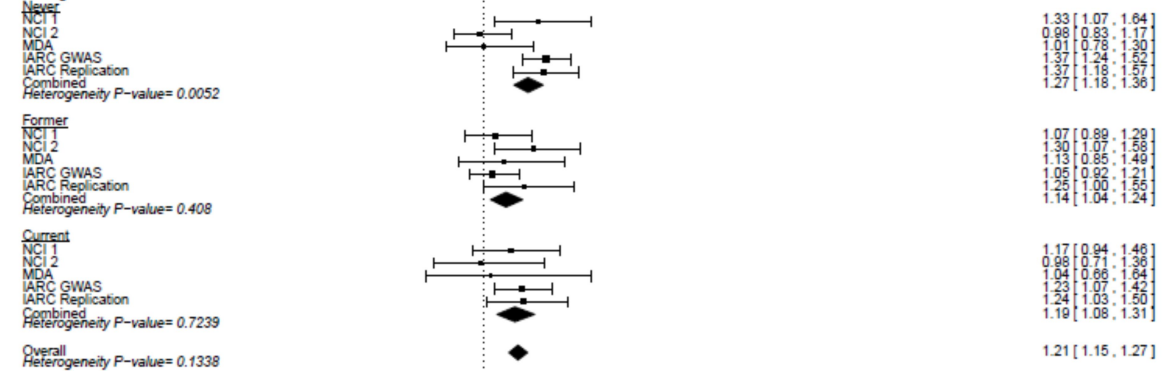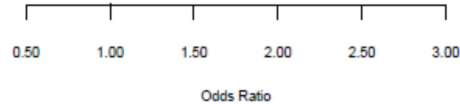

rs2109794

Body Mass Index

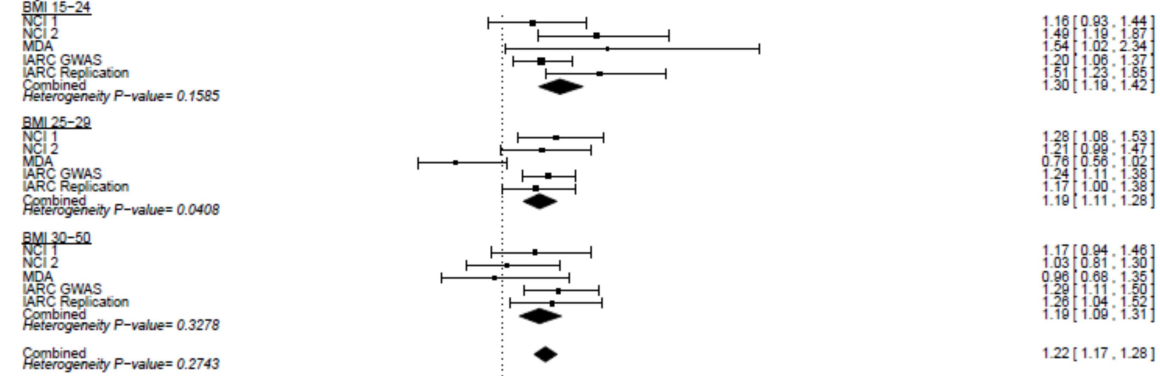

Hypertension

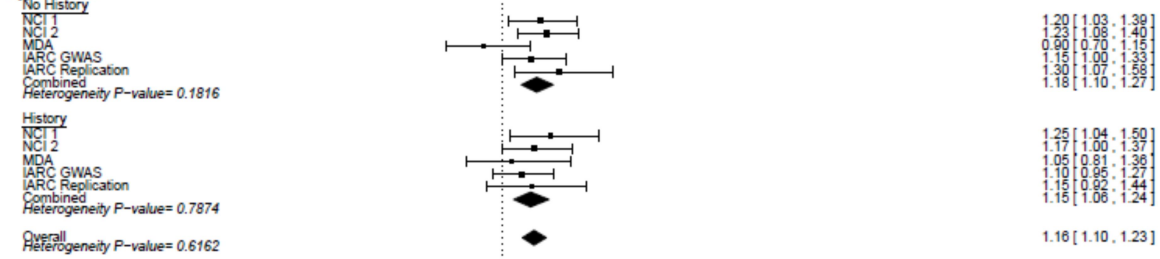

Sex

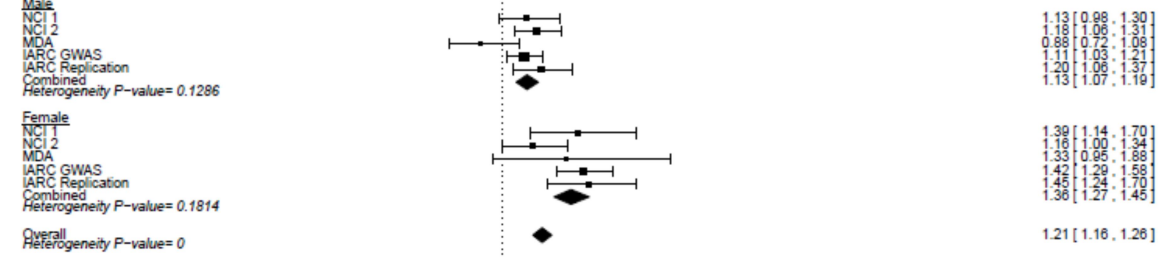

Smoking

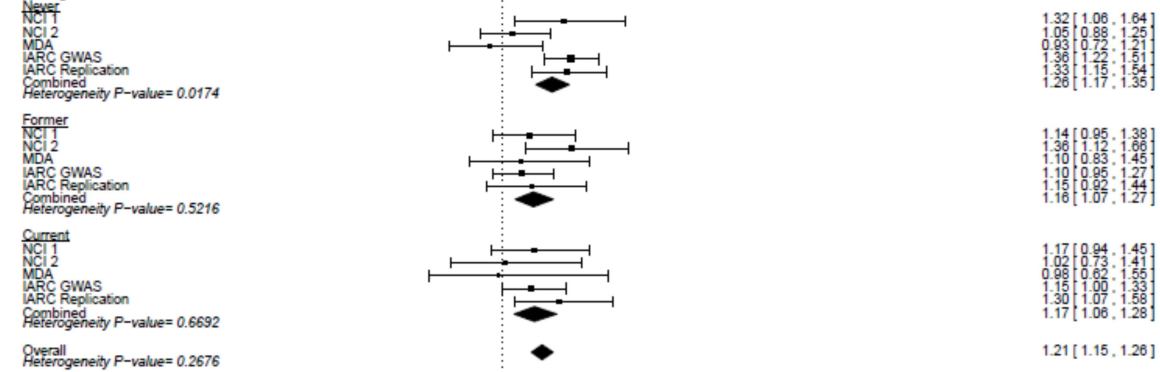

Odds Ratio

rs11637556

**Body Mass Index**

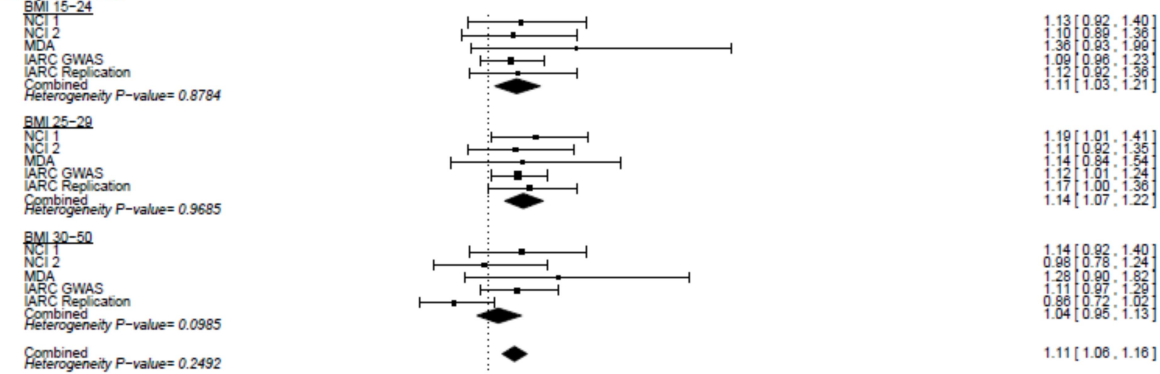

**Hypertension**

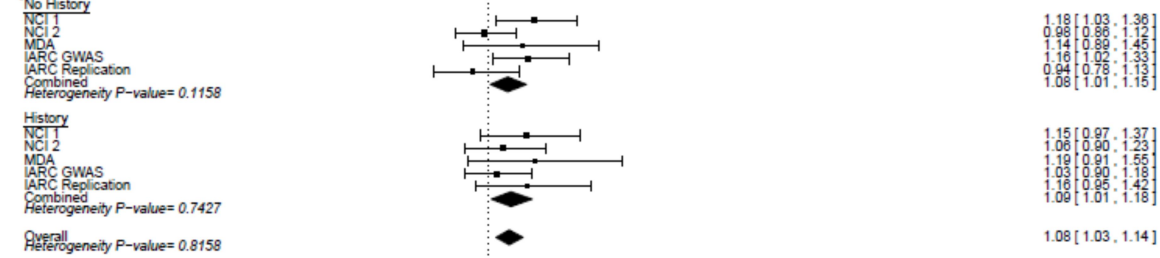

**Sex**

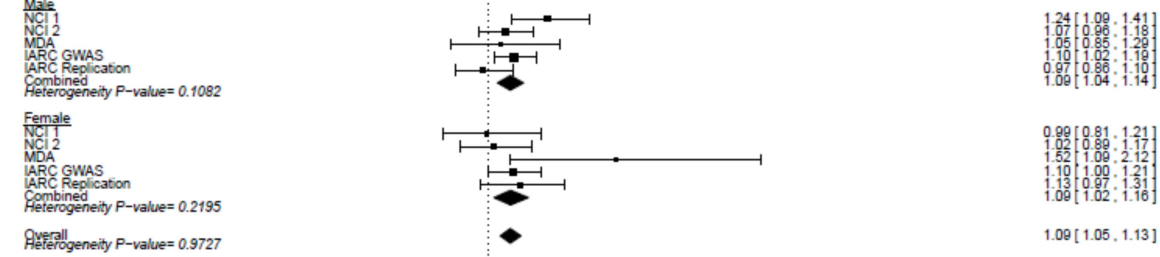

**Smoking**

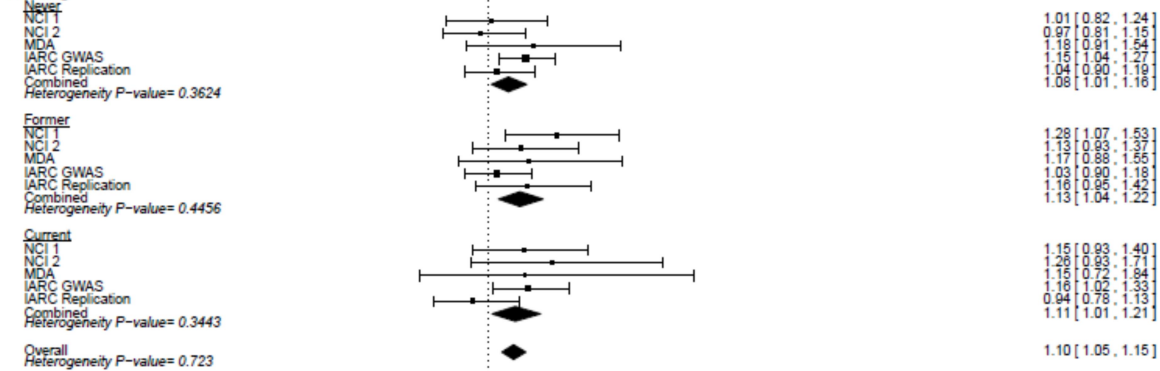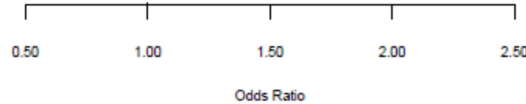

rs4804368

**Body Mass Index**

**BMI 15-24**

|                               |  |                      |
|-------------------------------|--|----------------------|
| NCI 1                         |  | 1.00 [ 0.83 , 1.21 ] |
| NCI 2                         |  | 1.05 [ 0.86 , 1.29 ] |
| MDA                           |  | 0.71 [ 0.50 , 1.01 ] |
| IARC GWAS                     |  | 0.95 [ 0.85 , 1.06 ] |
| IARC Replication              |  | 0.95 [ 0.79 , 1.15 ] |
| Combined                      |  | 0.95 [ 0.89 , 1.04 ] |
| Heterogeneity P-value= 0.4388 |  |                      |

**BMI 25-29**

|                               |  |                      |
|-------------------------------|--|----------------------|
| NCI 1                         |  | 0.94 [ 0.80 , 1.11 ] |
| NCI 2                         |  | 1.00 [ 0.84 , 1.19 ] |
| MDA                           |  | 0.84 [ 0.63 , 1.10 ] |
| IARC GWAS                     |  | 0.92 [ 0.84 , 1.02 ] |
| IARC Replication              |  | 0.95 [ 0.82 , 1.10 ] |
| Combined                      |  | 0.94 [ 0.89 , 1.00 ] |
| Heterogeneity P-value= 0.8541 |  |                      |

**BMI 30-60**

|                               |  |                      |
|-------------------------------|--|----------------------|
| NCI 1                         |  | 0.99 [ 0.81 , 1.20 ] |
| NCI 2                         |  | 0.91 [ 0.74 , 1.12 ] |
| MDA                           |  | 0.80 [ 0.59 , 1.09 ] |
| IARC GWAS                     |  | 0.87 [ 0.77 , 0.99 ] |
| IARC Replication              |  | 0.98 [ 0.83 , 1.17 ] |
| Combined                      |  | 0.92 [ 0.84 , 0.99 ] |
| Heterogeneity P-value= 0.6653 |  |                      |

|                               |  |                      |
|-------------------------------|--|----------------------|
| Combined                      |  | 0.94 [ 0.90 , 0.98 ] |
| Heterogeneity P-value= 0.6837 |  |                      |

**Hypertension**

**No History**

|                               |  |                      |
|-------------------------------|--|----------------------|
| NCI 1                         |  | 0.92 [ 0.81 , 1.05 ] |
| NCI 2                         |  | 0.90 [ 0.80 , 1.01 ] |
| MDA                           |  | 0.79 [ 0.63 , 0.98 ] |
| IARC GWAS                     |  | 0.89 [ 0.79 , 1.00 ] |
| IARC Replication              |  | 0.91 [ 0.77 , 1.09 ] |
| Combined                      |  | 0.89 [ 0.84 , 0.95 ] |
| Heterogeneity P-value= 0.8024 |  |                      |

**History**

|                               |  |                      |
|-------------------------------|--|----------------------|
| NCI 1                         |  | 1.05 [ 0.89 , 1.24 ] |
| NCI 2                         |  | 0.98 [ 0.85 , 1.13 ] |
| MDA                           |  | 0.76 [ 0.60 , 0.97 ] |
| IARC GWAS                     |  | 0.93 [ 0.82 , 1.05 ] |
| IARC Replication              |  | 0.97 [ 0.86 , 1.08 ] |
| Combined                      |  | 0.95 [ 0.89 , 1.02 ] |
| Heterogeneity P-value= 0.2994 |  |                      |

|                               |  |                      |
|-------------------------------|--|----------------------|
| Overall                       |  | 0.92 [ 0.88 , 0.96 ] |
| Heterogeneity P-value= 0.1725 |  |                      |

**Sex**

**Male**

|                               |  |                      |
|-------------------------------|--|----------------------|
| NCI 1                         |  | 0.95 [ 0.84 , 1.08 ] |
| NCI 2                         |  | 0.91 [ 0.83 , 0.99 ] |
| MDA                           |  | 0.78 [ 0.64 , 0.94 ] |
| IARC GWAS                     |  | 0.88 [ 0.82 , 0.94 ] |
| IARC Replication              |  | 1.05 [ 0.94 , 1.18 ] |
| Combined                      |  | 0.91 [ 0.87 , 0.95 ] |
| Heterogeneity P-value= 0.0362 |  |                      |

**Female**

|                               |  |                      |
|-------------------------------|--|----------------------|
| NCI 1                         |  | 1.05 [ 0.87 , 1.26 ] |
| NCI 2                         |  | 0.91 [ 0.80 , 1.03 ] |
| MDA                           |  | 0.79 [ 0.59 , 1.06 ] |
| IARC GWAS                     |  | 0.97 [ 0.89 , 1.06 ] |
| IARC Replication              |  | 0.87 [ 0.75 , 1.00 ] |
| Combined                      |  | 0.94 [ 0.89 , 0.99 ] |
| Heterogeneity P-value= 0.3433 |  |                      |

|                              |  |                      |
|------------------------------|--|----------------------|
| Overall                      |  | 0.92 [ 0.89 , 0.95 ] |
| Heterogeneity P-value= 0.501 |  |                      |

**Smoking**

**Never**

|                               |  |                      |
|-------------------------------|--|----------------------|
| NCI 1                         |  | 0.99 [ 0.82 , 1.20 ] |
| NCI 2                         |  | 0.87 [ 0.75 , 1.02 ] |
| MDA                           |  | 0.77 [ 0.60 , 0.98 ] |
| IARC GWAS                     |  | 0.94 [ 0.86 , 1.03 ] |
| IARC Replication              |  | 0.98 [ 0.86 , 1.12 ] |
| Combined                      |  | 0.93 [ 0.88 , 0.99 ] |
| Heterogeneity P-value= 0.3931 |  |                      |

**Former**

|                               |  |                      |
|-------------------------------|--|----------------------|
| NCI 1                         |  | 1.20 [ 1.01 , 1.42 ] |
| NCI 2                         |  | 1.08 [ 0.90 , 1.29 ] |
| MDA                           |  | 0.87 [ 0.69 , 1.11 ] |
| IARC GWAS                     |  | 0.93 [ 0.82 , 1.05 ] |
| IARC Replication              |  | 0.97 [ 0.86 , 1.08 ] |
| Combined                      |  | 1.00 [ 0.93 , 1.08 ] |
| Heterogeneity P-value= 0.1025 |  |                      |

**Current**

|                              |  |                      |
|------------------------------|--|----------------------|
| NCI 1                        |  | 0.73 [ 0.61 , 0.88 ] |
| NCI 2                        |  | 1.04 [ 0.78 , 1.39 ] |
| MDA                          |  | 0.53 [ 0.34 , 0.84 ] |
| IARC GWAS                    |  | 0.89 [ 0.79 , 1.00 ] |
| IARC Replication             |  | 0.91 [ 0.77 , 1.09 ] |
| Combined                     |  | 0.86 [ 0.79 , 0.93 ] |
| Heterogeneity P-value= 0.048 |  |                      |

|                               |  |                      |
|-------------------------------|--|----------------------|
| Overall                       |  | 0.93 [ 0.90 , 0.97 ] |
| Heterogeneity P-value= 0.0194 |  |                      |

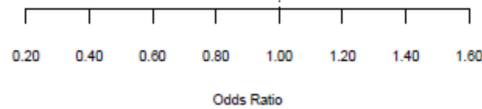



rs714024

Body Mass Index

BMI 15-24

|                               |                     |
|-------------------------------|---------------------|
| NCI 1                         | 1.10 [ 0.90, 1.33 ] |
| NCI 2                         | 0.94 [ 0.76, 1.15 ] |
| MDA                           | 0.95 [ 0.68, 1.33 ] |
| IARC GWAS                     | 1.05 [ 0.94, 1.18 ] |
| IARC Replication              | 0.97 [ 0.91, 1.17 ] |
| Combined                      | 1.02 [ 0.95, 1.10 ] |
| Heterogeneity P-value= 0.7481 |                     |

BMI 25-28

|                               |                     |
|-------------------------------|---------------------|
| NCI 1                         | 1.18 [ 1.00, 1.38 ] |
| NCI 2                         | 1.25 [ 1.02, 1.46 ] |
| MDA                           | 1.23 [ 0.92, 1.64 ] |
| IARC GWAS                     | 0.97 [ 0.88, 1.07 ] |
| IARC Replication              | 1.05 [ 0.91, 1.22 ] |
| Combined                      | 1.06 [ 1.00, 1.14 ] |
| Heterogeneity P-value= 0.0796 |                     |

BMI 30-39

|                               |                     |
|-------------------------------|---------------------|
| NCI 1                         | 0.99 [ 0.82, 1.20 ] |
| NCI 2                         | 1.31 [ 1.06, 1.63 ] |
| MDA                           | 0.97 [ 0.71, 1.33 ] |
| IARC GWAS                     | 1.17 [ 1.02, 1.34 ] |
| IARC Replication              | 0.94 [ 0.80, 1.11 ] |
| Combined                      | 1.06 [ 1.00, 1.17 ] |
| Heterogeneity P-value= 0.0768 |                     |

Combined  
Heterogeneity P-value= 0.5997

Hypertension

No History

|                               |                     |
|-------------------------------|---------------------|
| NCI 1                         | 1.04 [ 0.91, 1.19 ] |
| NCI 2                         | 1.10 [ 0.98, 1.24 ] |
| MDA                           | 1.13 [ 0.90, 1.41 ] |
| IARC GWAS                     | 1.06 [ 0.95, 1.22 ] |
| IARC Replication              | 0.98 [ 0.82, 1.16 ] |
| Combined                      | 1.07 [ 1.00, 1.14 ] |
| Heterogeneity P-value= 0.8036 |                     |

History

|                               |                     |
|-------------------------------|---------------------|
| NCI 1                         | 1.18 [ 1.01, 1.39 ] |
| NCI 2                         | 1.07 [ 0.92, 1.23 ] |
| MDA                           | 1.08 [ 0.85, 1.37 ] |
| IARC GWAS                     | 1.03 [ 0.91, 1.17 ] |
| IARC Replication              | 1.13 [ 0.94, 1.37 ] |
| Combined                      | 1.06 [ 1.01, 1.17 ] |
| Heterogeneity P-value= 0.7231 |                     |

Overall  
Heterogeneity P-value= 0.6901

Sex

Male

|                               |                     |
|-------------------------------|---------------------|
| NCI 1                         | 1.16 [ 1.02, 1.30 ] |
| NCI 2                         | 1.10 [ 1.00, 1.21 ] |
| MDA                           | 1.11 [ 0.91, 1.34 ] |
| IARC GWAS                     | 1.04 [ 0.97, 1.13 ] |
| IARC Replication              | 1.06 [ 0.91, 1.18 ] |
| Combined                      | 1.06 [ 1.03, 1.13 ] |
| Heterogeneity P-value= 0.6862 |                     |

Female

|                               |                     |
|-------------------------------|---------------------|
| NCI 1                         | 1.00 [ 0.83, 1.20 ] |
| NCI 2                         | 1.15 [ 1.01, 1.32 ] |
| MDA                           | 1.12 [ 0.83, 1.51 ] |
| IARC GWAS                     | 1.07 [ 0.98, 1.17 ] |
| IARC Replication              | 0.91 [ 0.79, 1.04 ] |
| Combined                      | 1.05 [ 0.99, 1.11 ] |
| Heterogeneity P-value= 0.1327 |                     |

Overall  
Heterogeneity P-value= 0.4444

Smoking

Never

|                               |                     |
|-------------------------------|---------------------|
| NCI 1                         | 1.17 [ 0.96, 1.41 ] |
| NCI 2                         | 1.11 [ 0.95, 1.31 ] |
| MDA                           | 1.06 [ 0.83, 1.35 ] |
| IARC GWAS                     | 1.04 [ 0.94, 1.14 ] |
| IARC Replication              | 0.99 [ 0.87, 1.13 ] |
| Combined                      | 1.05 [ 0.99, 1.12 ] |
| Heterogeneity P-value= 0.6224 |                     |

Former

|                               |                     |
|-------------------------------|---------------------|
| NCI 1                         | 1.09 [ 0.92, 1.29 ] |
| NCI 2                         | 1.26 [ 1.05, 1.51 ] |
| MDA                           | 1.21 [ 0.93, 1.59 ] |
| IARC GWAS                     | 1.03 [ 0.91, 1.17 ] |
| IARC Replication              | 1.13 [ 0.94, 1.37 ] |
| Combined                      | 1.11 [ 1.03, 1.20 ] |
| Heterogeneity P-value= 0.4496 |                     |

Current

|                               |                     |
|-------------------------------|---------------------|
| NCI 1                         | 1.04 [ 0.87, 1.25 ] |
| NCI 2                         | 0.88 [ 0.66, 1.19 ] |
| MDA                           | 0.82 [ 0.61, 1.09 ] |
| IARC GWAS                     | 1.08 [ 0.95, 1.22 ] |
| IARC Replication              | 0.98 [ 0.82, 1.16 ] |
| Combined                      | 1.02 [ 0.94, 1.11 ] |
| Heterogeneity P-value= 0.7134 |                     |

Overall  
Heterogeneity P-value= 0.331

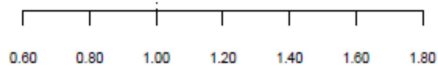

Odds Ratio

## Supplementary Tables.

**Supplementary Table 1. Description of the studies participating in the RCC GWAS meta-analysis.**

| Study Name (Abbreviation)                                                                                   | Design;<br>Location                                      | Study Population                                                                                                                                                                                                                                                                                                                                              | Genotyped Samples |              | Samples Used in Final Analysis |              | Genotyping Array |                         |
|-------------------------------------------------------------------------------------------------------------|----------------------------------------------------------|---------------------------------------------------------------------------------------------------------------------------------------------------------------------------------------------------------------------------------------------------------------------------------------------------------------------------------------------------------------|-------------------|--------------|--------------------------------|--------------|------------------|-------------------------|
|                                                                                                             |                                                          |                                                                                                                                                                                                                                                                                                                                                               | Cases             | Controls     | Cases                          | Controls     | Cases            | Controls                |
| <b>NEW SAMPLES</b>                                                                                          |                                                          |                                                                                                                                                                                                                                                                                                                                                               | <b>5,722</b>      | <b>7,439</b> | <b>5,198</b>                   | <b>7,331</b> |                  |                         |
| <b>IARC-2 scan</b>                                                                                          |                                                          |                                                                                                                                                                                                                                                                                                                                                               |                   |              |                                |              |                  |                         |
| The European Prospective Investigation into Cancer and Nutrition (EPIC)                                     | Prospective cohort<br>10 European countries              | Adults aged 35-74 enrolled between 1992 and 2000 (n=521,468)<br>Incident cancers identified through health insurance records, cancer and pathology registries and active follow-up (subjects and next of skin)<br>Genomic DNA extracted from buffy coat                                                                                                       | 127               | 138          | 127                            | 138          | Omni 5           | Omni 5                  |
| CeRePP                                                                                                      | Case series<br>France                                    | Pathologically confirmed RCC recruited through the CeRePP network.<br>Controls recruited from a systematic urologic screening program, which includes men or women who had no history or symptoms of kidney diseases and with a normal morphologic status of kidneys at ultrasonographic examination.<br>Genomic DNA extracted from blood and saliva samples. | 411               | 429          | 402                            | 422          | Omni 5           | Omni 5                  |
| Umea                                                                                                        | Prospective cohort<br>Sweden                             | Population-based cohort, recruiting since 1985; resident from the Västerbotten county in northern Sweden. Incident cases identified through linkage to national death and cancer registries.<br>Genomic DNA extracted from blood.                                                                                                                             | 306               | 312          | 297                            | 301          | Omni 5           | Omni 5                  |
| Karolinska                                                                                                  | 2 Prospective cohorts<br>Sweden                          | COSM: Cohort of Swedish Men (45,306 men enrolled in 1997) and SMC: Swedish Mammography Cohort (61,433 women enrolled between 1987 and 1990), in central Sweden. Incident cases identified through linkage to national death and cancer registries.<br>Genomic DNA extracted from saliva.                                                                      | 131               | 298          | 131                            | 295          | Omni 5           | Omni 5                  |
| Consortium For the Investigation of Renal Malignancies/ Melbourne Collaborative Cohort Study (ConFIRM/MCCS) | Case-control and cohort studies;<br>Australia            | Incident cases diagnosed in Victoria and Queensland in the period 2011-2014 and aged 18-74 years (ConFIRM), and from within the MCCS when fresh blood collected;<br>Controls selected from healthy participants in the MCCS cohort;<br>Genomic DNA extracted from whole blood (ConFIRM) and buffy coat (MCCS).                                                | 188               | 398          | 184                            | 396          | Omni 5           | Omni 5                  |
| The IARC K2 study                                                                                           | Case-control study<br>4 central/eastern Europe countries | Multicentric study conducted in 2007-2013 in Russia, Czech Republic, Romania, and Serbia. Hospital or population-based controls depending on recruiting centers.                                                                                                                                                                                              | 1,675             | 1,458        | 1,640                          | 1,388        | Omni 5           | Omni 5/<br>Omni Express |
| <b>IARC-2 Scan Total</b>                                                                                    |                                                          |                                                                                                                                                                                                                                                                                                                                                               | <b>2,838</b>      | <b>3,033</b> | <b>2,781</b>                   | <b>2,940</b> |                  |                         |
| <b>NCI-2 Scan:</b>                                                                                          |                                                          |                                                                                                                                                                                                                                                                                                                                                               |                   |              |                                |              |                  |                         |
| Agricultural Health Study (AHS)                                                                             | Prospective cohort;<br>USA (Iowa, North Carolina)        | Private and commercial pesticide applicators and spouses of private applicators, enrolled between 1993 and 1997 (n = 89,655).<br>Incident cancers identified through linkage with state cancer registries.<br>Germline DNA extracted from buccal cell samples.                                                                                                | 78                | -            | 7                              | -            | Omni Express     | -                       |
| Alpha-Tocopherol, Beta-Carotene Cancer Prevention Study (ATBC)                                              | Prospective cohort / randomized trial;<br>Finland        | Male smokers aged 50-69 at entry, enrolled between 1985 and 1988 (n = 29,133).<br>Incident cancers identified through linkage to Finnish Cancer Registry. Germline DNA extracted from whole blood samples.                                                                                                                                                    | 41                | 221*         | 39                             | 221*         | Omni Express     | Omni 2.5                |

|                                                                              |                                                        |                                                                                                                                                                                                                                                         |              |              |              |              |              |              |
|------------------------------------------------------------------------------|--------------------------------------------------------|---------------------------------------------------------------------------------------------------------------------------------------------------------------------------------------------------------------------------------------------------------|--------------|--------------|--------------|--------------|--------------|--------------|
| BioVU                                                                        | Hospital biorepository;<br>USA (Nashville)             | Renal cancer patients treated at Vanderbilt University Medical Center between 2006 and 2012. Controls selected from among patients admitted for non-cancer condition, frequency matched by age and sex.                                                 | 714          | 222          | 629          | 207          | Omni Express | Omni Express |
| American Cancer Society Cancer Prevention Study II Nutrition Cohort (CPS-II) | Prospective cohort;<br>USA                             | Men and women aged 50-74 at entry, enrolled between 1992 and 1993 (n = 184,194). Incident cancers identified from biannual follow-up questionnaires or linkage with state cancer registries. Germline DNA extracted from blood and buccal cell samples. | 85           | 212*         | 70           | 212*         | Omni Express | Omni 2.5     |
| Dana-Farber/Harvard Cancer Center (DFHCC)                                    | Case series;<br>USA (Boston)                           | Patients with localized renal cancer treated at DFHCC between 2002 and 2010. Genomic DNA extracted from blood samples.                                                                                                                                  | 234          | -            | 206          | -            | Omni Express | -            |
| Health Professionals Follow-up Study (HPFS)                                  | Prospective cohort;<br>USA                             | Men in selected health professions, enrolled in 1986 (n = 51,529). Incident cancers identified from follow-up questionnaires and subsequent medical record review. Germline DNA extracted from blood samples.                                           | 50           | 85*          | 38           | 85*          | Omni Express | Omni Express |
| Nurses' Health Study (NHS)                                                   | Prospective cohort;<br>USA                             | Female registered nurses aged 30-55, enrolled in 1976 (n = 121,700). Incident cancers identified by mailed follow-up questionnaire and subsequent medical record review. Germline DNA extracted from blood samples.                                     | 66           | 434*         | 57           | 434*         | Omni Express | Omni Express |
| Physicians Health Study (PHS)                                                | Prospective cohort /<br>randomized trial; USA          | Male physicians aged 50+ enrolled between 1982 and 1984 (n = 22,071). Incident cancers identified by mailed follow-up questionnaire. Germline DNA extracted from blood samples.                                                                         | 27           | -            | 21           | -            | Omni Express | -            |
| Prostate, Lung, Colorectal and Ovarian Cancer Screening Trial (PLCO)         | Prospective cohort /<br>cancer screening trial;<br>USA | Men and women aged 55-74 at entry, enrolled between 1993 and 2001 (n = 155,000). Incident cancers identified from annual questionnaires, with confirmation through medical records. Germline DNA extracted from buffy coat and buccal cell samples.     | 118          | 3,003*       | 93           | 3,003*       | Omni Express | Omni 2.5     |
| Van Andel Research Institute (VARI)                                          | Case series;<br>USA                                    | Renal cancer patients treated at the Spectrum Health Hospital in Grand Rapids, MI, and in hospitals affiliated with the Cooperative Human Tissue Network (CHTN). Germline DNA extracted from adjacent normal kidney tissue.                             | 1,050        | -            | 920          | -            | Omni Express | -            |
| Vitamins and Lifestyle Study (VITAL)                                         | Prospective cohort;<br>USA (Washington State)          | Men and women aged 50-76, enrolled between 2000 and 2002. Incident cancers identified by linkage to the western Washington SEER cancer registry. Germline DNA extracted from buccal cell samples.                                                       | 112          | -            | 91           | -            | Omni Express | -            |
| Women's Health Initiative (WHI)                                              | Prospective cohort /<br>randomized trial;<br>USA       | Women aged 50-79, enrolled between 1993 and 1998. Incident cancers were identified by mailed follow-up questionnaires, and verified by medical records. Genomic DNA extracted from buffy coat samples.                                                  | 300          | 229*         | 239          | 229*         | Omni Express | Omni Express |
| Women's Health Study (WHS)                                                   | Prospective cohort /<br>randomized trial;<br>USA       | Female health professionals aged 45 years or older, enrolled in 1993. Incident cancers identified by mailed follow-up questionnaire. Genomic DNA extracted from blood samples.                                                                          | 9            | -            | 7            | -            | Omni Express | -            |
| <b>NCI-2 Scan Total</b>                                                      |                                                        |                                                                                                                                                                                                                                                         | <b>2,884</b> | <b>4,406</b> | <b>2,417</b> | <b>4,391</b> |              |              |

|                                     |              |               |              |               |
|-------------------------------------|--------------|---------------|--------------|---------------|
| <b>PREVIOUSLY AVAILABLE SAMPLES</b> | <b>6,031</b> | <b>13,436</b> | <b>5,585</b> | <b>13,075</b> |
|-------------------------------------|--------------|---------------|--------------|---------------|

**IARC-1 scan**

|                                                                                               |                                             |                                                                                                                                                                                                                                                    |     |     |     |     |      |      |
|-----------------------------------------------------------------------------------------------|---------------------------------------------|----------------------------------------------------------------------------------------------------------------------------------------------------------------------------------------------------------------------------------------------------|-----|-----|-----|-----|------|------|
| The European Prospective Investigation into Cancer and Nutrition (EPIC) [additional to above] | Prospective cohort<br>10 European countries | Adults aged 35-74 enrolled between 1992 and 2000 (n=521,468). Incident cancers identified through health insurance records, cancer and pathology registries and active follow-up (subjects and next of kin). Genomic DNA extracted from buffy coat | 319 | 434 | 275 | 414 | 610Q | 550K |
|-----------------------------------------------------------------------------------------------|---------------------------------------------|----------------------------------------------------------------------------------------------------------------------------------------------------------------------------------------------------------------------------------------------------|-----|-----|-----|-----|------|------|

|                                                                                            |                                            |                                                                                                                                                                                                                                                                                                                                                                                                                                                |              |              |              |              |      |          |
|--------------------------------------------------------------------------------------------|--------------------------------------------|------------------------------------------------------------------------------------------------------------------------------------------------------------------------------------------------------------------------------------------------------------------------------------------------------------------------------------------------------------------------------------------------------------------------------------------------|--------------|--------------|--------------|--------------|------|----------|
| The Nord-Trøndelag Health (HUNT2) and Tromsø Studies (Tromsø IV)                           | 2 Prospective cohorts<br>Norway            | HUNT2: Adults aged 20+ enrolled between 1995 and 1997 (N=65,285)<br>Tromsø IV: Adults aged 25+ enrolled between 1994-1995 (N=27,158)<br>Cases identified through Norwegian Cancer Registries<br>Genomic DNA extracted from buffy coat                                                                                                                                                                                                          | 145          | 433          | 133          | 388          | 610Q | 317K     |
| The NCI/IARC study in central Europe (CE)                                                  | Case-control study<br>4 European countries | Hospital based study conducted between 1999-2003 (except Poland) 2004-2007 (Poland). Controls matched to lung cancer and included in previous GWAS of lung cancer<br>Genomic DNA extracted from buffy coat and RBC                                                                                                                                                                                                                             | 1,152        | 2,179        | 1,096        | 2,058        | 317K | 317K     |
| Arsenic Health Risk Assessment and Molecular Epidemiology study in Central Europe (ASHRAM) | Case-control study<br>Slovakia and Hungary | Cases recruited in 6 counties between 2002-2004<br>Controls matched to lung cancer and included in previous GWAS of lung cancer<br>Genomic DNA extracted from whole blood                                                                                                                                                                                                                                                                      | 89           | 425          | 84           | 399          | 610Q | 317K     |
| CeRePP<br>[additional to above]                                                            | Case series<br>France                      | Pathologically confirmed RCC involved in PROGENE-CeRePP cohort<br>French controls originally participated in a hospital based case-control study of UADT cancer<br>Genomic DNA extracted from blood                                                                                                                                                                                                                                            | 79           | 166          | 58           | 146          | 610Q | 317K     |
| The Leeds cohort                                                                           | Case series<br>UK                          | RCC from the Leeds cohort recruited between 1998-2007<br>Genomic DNA extracted from blood                                                                                                                                                                                                                                                                                                                                                      | 363          | -            | 348          | -            | 610Q | -        |
| SEARCH Kidney cancer study (SEARCH)                                                        | Case series<br>UK                          | Population based case series including all patients with a kidney cancer aged 70- and diagnosed between 2002-2006<br>Genomic DNA extracted from blood                                                                                                                                                                                                                                                                                          | 187          | -            | 181          | -            | 610Q | -        |
| WTCCC                                                                                      | Controls<br>UK                             | Dataset generated by the Wellcome Trust Sanger Institute in collaboration with the 1958 Birth cohort<br>Genomic DNA extracted from blood                                                                                                                                                                                                                                                                                                       | -            | 1,438        | -            | 1,361        | -    | 550K     |
| Moscow                                                                                     | Case-control study<br>Moscow               | Incident cases were recruited between 2007-2009. Hospital based controls were match and recruited during same period<br>Genomic DNA extracted from blood                                                                                                                                                                                                                                                                                       | 305          | 323          | 263          | 305          | 610Q | 610Q     |
| <b>IARC -I Scan Total</b>                                                                  |                                            |                                                                                                                                                                                                                                                                                                                                                                                                                                                | <b>2,639</b> | <b>5,398</b> | <b>2,438</b> | <b>5,071</b> |      |          |
| <b><u>NCI-I Scan:</u></b>                                                                  |                                            |                                                                                                                                                                                                                                                                                                                                                                                                                                                |              |              |              |              |      |          |
| Alpha-Tocopherol, Beta-Carotene Cancer Prevention Study (ATBC)                             | See above                                  | See above                                                                                                                                                                                                                                                                                                                                                                                                                                      | 177          | 1,288*       | 163          | 1,288*       | 660W | 610K     |
| American Cancer Society Cancer Prevention Study II Nutrition Cohort (CPS-II)               | See above                                  | See above                                                                                                                                                                                                                                                                                                                                                                                                                                      | 226          | 730*         | 202          | 730*         | 660W | 610K     |
| Prostate, Lung, Colorectal and Ovarian Cancer Screening Trial (PLCO)                       | See above                                  | See above                                                                                                                                                                                                                                                                                                                                                                                                                                      | 330          | 845*         | 284          | 845*         | 660W | 550/610K |
| National Cancer Institute U.S. Kidney Cancer Study (USKC)                                  | Case-control;<br>USA (Chicago, Detroit)    | Cases: 1,227 men and women aged 20-79 at diagnoses, identified from Chicago hospital records and Metropolitan Detroit Cancer Surveillance System between 2003 and 2007.<br>Controls: 1,235 men and women recruited from state Department of Motor Vehicle records (ages 30-64) and Medicare beneficiary records (ages 65+), frequency matched to cases on age, race, sex, region.<br>Genomic DNA extracted from blood and buccal cell samples. | 720          | 595          | 662          | 561          | 610K | 610K     |
| <b>NCI-I Scan Total:</b>                                                                   |                                            |                                                                                                                                                                                                                                                                                                                                                                                                                                                | <b>1,453</b> | <b>3,458</b> | <b>1,311</b> | <b>3,424</b> |      |          |

|                                 |                              |                                                                                                                                                                                                                                                                                                                                                                                                                |              |               |            |               |                 |                 |
|---------------------------------|------------------------------|----------------------------------------------------------------------------------------------------------------------------------------------------------------------------------------------------------------------------------------------------------------------------------------------------------------------------------------------------------------------------------------------------------------|--------------|---------------|------------|---------------|-----------------|-----------------|
| <b><u>MD Anderson Scan:</u></b> | Case-control;<br>USA (Texas) | Cases: 894 Caucasian men and women treated for renal cancer at the University of Texas MD Anderson Cancer Center. Controls:556 Caucasian men and women identified through random-digit dialing. Genomic DNA extracted from blood samples.                                                                                                                                                                      | <b>894</b>   | <b>556</b>    | <b>893</b> | <b>556</b>    | 660W            | 660W            |
| <b><u>UK Scan:</u></b>          | Case series;<br>UK           | Cases: adult renal cancer patients identified from UK clinical oncology centers and the Institute of Cancer Research and Royal Marsden NHS Hospitals Trust. Controls: previously genotyped samples from the Wellcome Trust Case Control Consortium 2 1958 birth cohort and UK Blood Service Control Group (WTCC controls included in the IARC-1 scan were excluded). Genomic DNA extracted from blood samples. | <b>1,045</b> | <b>4,024*</b> | <b>944</b> | <b>4,024*</b> | Omni<br>Express | Hap 1.2M<br>Duo |

---

\*Previously scanned controls

**Supplementary Table 2. Meta-analysis results for previously reported RCC GWAS loci**

| SNP         | Locus    | Previously Reported GWAS        |      |             |                         | Current Meta-Analysis |             |                         |                                   |      |
|-------------|----------|---------------------------------|------|-------------|-------------------------|-----------------------|-------------|-------------------------|-----------------------------------|------|
|             |          | Study                           | OR   | (95% CI)    | <i>P</i>                | OR                    | (95% CI)    | <i>P</i>                | <i>P</i> <sub>Heterogeneity</sub> | MAF  |
| rs3845536   | 1q24.1   | Henrion et al. <sup>1</sup>     | 1.21 | (1.13-1.30) | 2.3 x 10 <sup>-8</sup>  | 1.05                  | (1.01-1.09) | 0.0062                  | 3.0 x 10 <sup>-5</sup>            | 0.36 |
| rs7579899   | 2p21     | Purdue et al. <sup>2</sup>      | 1.15 | (1.10-1.21) | 2.3 x 10 <sup>-9</sup>  | 1.15                  | (1.11-1.20) | 5.3 x 10 <sup>-15</sup> | 0.31                              | 0.49 |
| rs11894252  | 2p21     | Purdue et al. <sup>2</sup>      | 1.14 | (1.09-1.20) | 1.8 x 10 <sup>-8</sup>  | 1.16                  | (1.12-1.20) | 2.7 x 10 <sup>-15</sup> | 0.28                              | 0.49 |
| rs12105918  | 2q22.3   | Henrion et al. <sup>3</sup>     | 1.29 | (1.18-1.41) | 1.8 x 10 <sup>-8</sup>  | 1.25                  | (1.16-1.34) | 3.9 x 10 <sup>-9</sup>  | 0.14                              | 0.06 |
| rs35252396* | 8q24     | Gudmundsson et al. <sup>4</sup> | 1.27 | (1.18-1.37) | 5.4 x 10 <sup>-11</sup> | 1.13                  | (1.10-1.18) | 2.8 x 10 <sup>-12</sup> | 0.17                              | 0.44 |
| rs7105934   | 11q13    | Purdue et al. <sup>2</sup>      | 0.69 | (0.62-0.76) | 7.8 x 10 <sup>-14</sup> | 0.70                  | (0.65-0.75) | 4.9 x 10 <sup>-22</sup> | 0.20                              | 0.08 |
| rs718314    | 12p11.23 | Wu et al. <sup>5</sup>          | 1.19 | (1.13-1.26) | 8.9 x 10 <sup>-10</sup> | 1.18                  | (1.14-1.23) | 2.2 x 10 <sup>-16</sup> | 0.45                              | 0.26 |
| rs1049380   | 12p11.23 | Wu et al. <sup>5</sup>          | 1.18 | (1.12-1.25) | 6.1 x 10 <sup>-9</sup>  | 1.15                  | (1.11-1.19) | 2.0 x 10 <sup>-12</sup> | 0.02                              | 0.44 |
| rs4765623   | 12q24    | Purdue et al. <sup>2</sup>      | 1.15 | (1.09-1.20) | 2.6 x 10 <sup>-8</sup>  | 1.14                  | (1.10-1.18) | 2.8 x 10 <sup>-12</sup> | 0.22                              | 0.34 |

ORs computed for minor allele vs. common allele.

\*Current meta-analysis based on rs64070588, in complete LD with rs35252396.

**Supplementary Table 3. Description of the studies included in replication stage.**

| <b>Study Name (Abbreviation)</b> | <b>Design;<br/>Location</b>                                    | <b>Study Population</b>                                                                                                                                                                                            | <b>Genotyped Samples</b> |                 |
|----------------------------------|----------------------------------------------------------------|--------------------------------------------------------------------------------------------------------------------------------------------------------------------------------------------------------------------|--------------------------|-----------------|
|                                  |                                                                |                                                                                                                                                                                                                    | <b>Cases</b>             | <b>Controls</b> |
| IARC Replication                 | Case-control<br>and cohort studies;<br>Europe<br>and Australia | The sample set was composed of additional cases<br>and controls selected from the following studies<br>described in Supp table 1: IARC K2, CE, Umea,<br>and ConFIRM/MCCS                                           | 1,674                    | 4,222           |
| Mayo Clinic (Mayo)               | Case-control;<br>USA                                           | Cases: Caucasian men and women treated<br>for RCC at Mayo.<br>Controls: patients admitted to General Medicine<br>Clinics at Mayo                                                                                   | 909                      | 1,479           |
| MD Anderson (MDA)                | Case-control;<br>Houston, USA                                  | Cases: Caucasian men and women treated<br>for renal cancer at MDA.<br>Controls: Caucasian men and women identified<br>through random-digit dialing.<br>(additional samples to these described in<br>Supp table 1). | 599                      | 600             |

**Supplementary Table 4. Technical validation of top SNPs; concordance rates between genome-wide-scanned or imputed SNPs and Taqman genotyping.**

| SNP                     | IARC-1/2      |                                           | NCI-2         |                                           |
|-------------------------|---------------|-------------------------------------------|---------------|-------------------------------------------|
|                         | % concordance | Pearson correlation coefficient ( $r^2$ ) | % concordance | Pearson correlation coefficient ( $r^2$ ) |
| rs10936602 <sup>a</sup> | 99.6          | 0.995                                     | 100.00        | 1.000                                     |
| rs11637556 <sup>b</sup> | 99.8          | 0.998                                     | 100.00        | 0.999                                     |
| rs11813268 <sup>b</sup> | 97.8          | 0.958                                     | 99.82         | 0.994                                     |
| rs1266819 <sup>b</sup>  | 99.7          | 0.997                                     | 99.82         | 0.996                                     |
| rs13376700 <sup>b</sup> | 99.7          | 0.997                                     | 99.46         | 0.985                                     |
| rs17050872 <sup>a</sup> | 98.3          | 0.979                                     | 100.00        | 1.000                                     |
| rs1800057 <sup>b</sup>  | 98.8          | 0.824                                     | 98.89         | 0.817                                     |
| rs2109794 <sup>b</sup>  | 99.3          | 0.990                                     | 99.81         | 0.989                                     |
| rs2203002 <sup>a</sup>  | 99.3          | 0.971                                     | 99.05         | 0.878                                     |
| rs2241261 <sup>a</sup>  | 99.6          | 0.995                                     |               |                                           |
| rs234043 <sup>a</sup>   | 99.2          | 0.990                                     | 99.82         | 0.996                                     |
| rs2889 <sup>a</sup>     | 99.1          | 0.990                                     | 99.64         | 0.991                                     |
| rs4381241 <sup>a</sup>  | 99.7          | 0.997                                     | 99.82         | 0.991                                     |
| rs4662750 <sup>a</sup>  | 97.0          | 0.967                                     | 97.90         | 0.909                                     |
| rs4804368 <sup>a</sup>  | 99.8          | 0.997                                     | 99.82         | 0.993                                     |
| rs4903064 <sup>a</sup>  | 98.9          | 0.985                                     | 99.05         | 0.948                                     |
| rs59294613 <sup>b</sup> | 99.9          | 0.999                                     | 100.00        | 1.000                                     |
| rs6706003 <sup>b</sup>  | 98.1          | 0.980                                     | 98.23         | 0.944                                     |
| rs67311347 <sup>b</sup> | 98.9          | 0.985                                     | 98.68         | 0.863                                     |
| rs6755594 <sup>b</sup>  | 98.1          | 0.979                                     | 99.26         | 0.967                                     |
| rs714024 <sup>b</sup>   | 98.8          | 0.986                                     | 98.64         | 0.926                                     |
| rs72730336 <sup>b</sup> | 99.8          | 0.997                                     | 99.82         | 0.991                                     |
| rs72851889 <sup>b</sup> | 97.0          | 0.781                                     | 96.29         | 0.591                                     |
| rs72855540 <sup>b</sup> | 99.1          | 0.933                                     | 98.85         | 0.825                                     |
| rs73149977 <sup>a</sup> | 99.4          | 0.992                                     | 99.82         | 0.992                                     |
| rs74911261 <sup>a</sup> | 99.3          | 0.905                                     | 99.63         | 0.899                                     |
| rs76912165 <sup>b</sup> | 96.6          | 0.851                                     | 96.61         | 0.491                                     |
| rs7697932 <sup>b</sup>  | 99.1          | 0.990                                     | 98.57         | 0.906                                     |
| rs77736197 <sup>a</sup> | 99.7          | 0.985                                     | 99.25         | 0.895                                     |
| rs77774900 <sup>a</sup> | 99.0          | 0.970                                     | 99.42         | 0.906                                     |
| rs7913447 <sup>b</sup>  | 98.3          | 0.980                                     | 98.85         | 0.941                                     |
| rs8007348 <sup>b</sup>  | 99.8          | 0.997                                     | 100.00        | 1.000                                     |

<sup>a</sup>Imputed or genotyped across scans; <sup>b</sup>imputed across all scans.



**Supplementary Table 5. Associations with 13-SNP RCC polygenic risk score (PRS): overall, and by histology, age at onset and stage**

| Analysis                                    | OR   | 95% CI      | P         |
|---------------------------------------------|------|-------------|-----------|
| <b>All RCC</b>                              |      |             |           |
| Across PRS deciles                          |      |             |           |
| 1                                           | 1.00 |             |           |
| 2                                           | 1.34 | (1.16-1.54) | 3.60E-05  |
| 3                                           | 1.41 | (1.23-1.62) | 8.30E-07  |
| 4                                           | 1.56 | (1.36-1.79) | 1.00E-10  |
| 5                                           | 1.71 | (1.50-1.96) | 1.98E-15  |
| 6                                           | 1.93 | (1.69-2.20) | 8.40E-23  |
| 7                                           | 1.93 | (1.69-2.20) | 7.20E-23  |
| 8                                           | 2.11 | (1.85-2.40) | 1.20E-29  |
| 9                                           | 2.52 | (2.22-2.86) | 8.40E-46  |
| 10                                          | 3.24 | (2.86-3.67) | 1.20E-76  |
| Continuous (per PRS unit increase)          | 2.85 | (2.62-3.11) | 2.30E-125 |
| By histology (per PRS unit increase)        |      |             |           |
| Clear cell RCC vs. controls                 | 3.24 | (2.91-3.62) | 3.40E-100 |
| Papillary RCC vs. controls                  | 1.83 | (1.44-2.32) | 5.30E-07  |
| Chromophobe RCC vs. controls                | 2.34 | (1.58-3.46) | 2.40E-05  |
| By RCC age at onset (per PRS unit increase) |      |             |           |
| <60 vs. 60+                                 | 1.01 | (0.88-1.15) | 9.10E-01  |
| By stage (per PRS unit increase)            |      |             |           |
| 2 vs. 1                                     | 0.92 | (0.63-1.36) | 6.90E-01  |
| 3 vs. 1                                     | 1.24 | (0.91-1.70) | 1.80E-01  |
| 4 vs. 1                                     | 1.36 | (0.97-1.93) | 8.00E-02  |

## **Supplementary Note**

### **Additional acknowledgement:**

#### **AHS**

This research was supported by the Intramural Research Program of the NIH, National Cancer Institute, Division of Cancer Epidemiology and Genetics (Z01CP010119).

#### **ATBC**

The ATBC Study was supported by funding provided by the Intramural Research Program of the NCI, NIH, and through U.S. Public Health Service contracts (N01-CN-45165, N01-RC-45035 and N01-RC-37004) from the NCI.

#### **BioVU**

The dataset used in the analyses described were obtained from the Vanderbilt University Medical Center resource BioVU, which is supported by institutional funding, the 1S10RR025141-01 instrumentation award, and by the Vanderbilt CTSA grant UL1 TR000445 from NCATS/NIH. Sample processing and phenotyping algorithm development was supported by institutional funding for TLE.

#### **Center 'Bioengineering' of the Russian Academy of Sciences/Kurchatov Scientific Center**

The work conducted for this study was supported by the grant Russian Scientific Fund 14-14-01202.

#### **Centre National de Genotypage, France**

We thank Jean Guillaume Garnier and Delphine Bacq-Daian for their work on the IARC-2 scan.

## **ConFIRM/MCCS**

The ConFIRM study, also known as CARES, was supported by the Victorian Cancer Agency (PTCB08\_05), the Australian National Health and Medical Research Council (Project Grant 1011626). We acknowledge the contribution of Professor Graham Giles in supporting this work and of Ms Olive Schmid and Ms Jennifer Walsh for the project management.

The Melbourne Collaborative Cohort Study (MCCS) recruitment was funded by VicHealth and Cancer Council Victoria. The MCCS was further supported by Australian NHMRC grants 209057, 251553 and 504711 and by infrastructure provided by Cancer Council Victoria.

## **CPS-II**

The Cancer Prevention Study II Nutrition Cohort is supported by the American Cancer Society. The authors thank all of the men and women in the Cancer Prevention Study II Nutrition Cohort for their many years of dedicated participation in the study.

## **Health Professionals Follow-up Study (HPFS) and Nurses' Health Study (NHS)**

The HPFS is supported by National Institutes of Health, National Cancer Institute grant UM1 CA167552. The NHS is supported by National Institutes of Health, National Cancer Institute grants UM1 CA186107 and P01 CA87969. We would like to thank the following state cancer registries for their help: AL, AZ, AR, CA, CO, CT, DE, FL, GA, ID, IL, IN, IA, KY, LA, ME, MD, MA, MI, NE, NH, NJ, NY, NC, ND, OH, OK, OR, PA, RI, SC, TN, TX, VA, WA, WY.

The authors assume full responsibility for analyses and interpretation of these data.

## **K2 study**

This study was supported by the EU FP7 under grant agreement number 241669 (the CAGEKID project). In Czech Republic, this work was also supported by MH CZ—DRO (MMCI, 00209805) and by the project MEYS – NPS I – LO1413, Czech Republic.

### **Leeds Cohort**

The infrastructure support from Cancer Research UK as part of the Leeds Centre and Experimental Cancer Medicine Centre funding is gratefully acknowledged together with the Leeds Multidisciplinary Research Tissue Bank, all patients who consented to take part in the research studies and the staff of the Urology and Oncology Departments in Leeds Teaching Hospitals Trust.

### **Mayo Clinic**

This study was partially supported by National Institutes of Health: R21CA176422 (JEEP) and R01CA134466 (ASP). The authors acknowledge the Mayo Clinic Comprehensive Cancer Center Biospecimens Accessioning and Processing Shared Resource and the Pathology Research Core Shared Resource.

### **MD Anderson**

This work was supported in part by the NIH (grant R01 CA170298) and the Center for Translational and Public Health Genomics, Duncan Family Institute for Cancer Prevention and Risk Assessment, The University of Texas MD Anderson Cancer Center.

### **NCI/IARC RCC Study in Central Europe (CE)**

This project was supported by the Intramural Research Program of the NIH and the National Cancer Institute.

### **Physicians' Health Study (PHS)**

This study was supported by grants CA 097193, CA 34944, CA 40360, HL 26490, and HL 34595 from the National Institutes of Health, Bethesda, MD.

## **PLCO**

This research was supported by the Intramural Research Program of the National Cancer Institute and by contracts from the Division of Cancer Prevention, National Cancer Institute, NIH, DHHS.

## **SEARCH**

This study is funded by Cancer Research UK (C490/A16651).

## **UK GWAS**

We acknowledge support from the Medical Research Council (MRC), Cancer Research UK, an educational grant from Bayer and NHS funding for the Royal Marsden Biomedical Research Centre and Cambridge University Health Partners. JL is supported by the NIHR RM/CR Biomedical Research Centre for Cancer.

## **US Kidney Cancer Study**

The NCI United States Kidney Cancer Study was supported by the Intramural Research Program of the National Institutes of Health and the National Cancer Institute under the following

contracts: N02-CP-10128 (Westat, Inc.), N02-CP-11004 (Wayne State University), and N02-CP-11161 (University of Illinois at Chicago).

## **Van Andel Research Institute (VARI)**

The authors would like to thank Dr. Kyle Furge for his role in this project as well as Drs. Anthony Avallone, John Ludlow and Philip Wise for contributing samples for this project.

## **Women's Health Initiative (WHI)**

The WHI program is funded by the National Heart, Lung, and Blood Institute, National Institutes of Health, U.S. Department of Health and Human Services through contracts

HHSN268201100046C, HHSN268201100001C, HHSN268201100002C,  
HHSN268201100003C, HHSN268201100004C, and HHSN271201100004C. For a list of all the  
investigators who have contributed to WHI science, please visit:  
<https://www.whi.org/researchers/Documents%20%20Write%20a%20Paper/WHI%20Investigator%20Long%20List.pdf>.

**Women's Health Study (WHS)**

The study is supported by grants CA-047988, HL-043851, HL-080467, HL-099355, and UM1  
CA182913 from the National Institutes of Health, Bethesda, MD.

## Supplementary References

1. Henrion, M.Y. *et al.* Common variation at 1q24.1 (ALDH9A1) is a potential risk factor for renal cancer. *PLoS One* **10**, e0122589 (2015).
2. Purdue, M.P. *et al.* Genome-wide association study of renal cell carcinoma identifies two susceptibility loci on 2p21 and 11q13.3. *Nat Genet* **43**, 60-5 (2011).
3. Henrion, M. *et al.* Common variation at 2q22.3 (ZEB2) influences the risk of renal cancer. *Hum Mol Genet* **22**, 825-31 (2013).
4. Gudmundsson, J. *et al.* A common variant at 8q24.21 is associated with renal cell cancer. *Nat Commun* **4**, 2776 (2013).
5. Wu, X. *et al.* A genome-wide association study identifies a novel susceptibility locus for renal cell carcinoma on 12p11.23. *Hum Mol Genet* **21**, 456-62 (2012).
